# Supplementary material for: Insights into Diversity and Imputed Metabolic Potential of Bacterial Communities in the Continental Shelf of Agatti Island
Source: PLoS One. 2015 Jun 11;10(6):e0129864. doi: 10.1371/journal.pone.0129864 (PMC4465901; doi:10.1371/journal.pone.0129864)
Supplement: S3 Table — The table consists of results of the imputed metagenomic predictions along with the OTU ID’s and KEGG annotations. (XLSX) [file pone.0129864.s004.xlsx]

## Sheet: Sheet1
#OTU ID	KEGG_Description	SG01	SG02	SG05	SG10	SG15	SG20	SG25	SG30	SG35	SG40
K12466	(+)-trans-carveol dehydrogenase [EC:1.1.1.275]	9	29	12	286	328	23	96	95	146	15
K06044	(1->4)-alpha-D-glucan 1-alpha-D-glucosylmutase [EC:5.4.99.15]	82788	8408	55057	12958	6409	57674	2960	3696	2982	314
K14448	(2S)-methylsuccinyl-CoA dehydrogenase	19	1058	862	6675	3119	2577	8269	8668	13872	731
K14451	(3S)-malyl-CoA thioesterase	11	12	44	42	1572	9	5822	6109	12626	657
K03526	(E)-4-hydroxy-3-methylbut-2-enyl-diphosphate synthase [EC:1.17.7.1]	84664	140576	82485	122668	94130	69378	71414	27778	53633	37719
K12985	(galactosyl)LPS 1,2-glucosyltransferase [EC:2.4.1.-]	0	0	0	0	8	0	0	0	0	1
K12984	(heptosyl)LPS beta-1,4-glucosyltransferase [EC:2.4.1.-]	16	14	148	50	2631	66	2615	1925	7095	32322
K05884	(R)-2-hydroxyacid dehydrogenase [EC:1.1.1.272]	2	989	6	7	73	58	51	64	20	5
K00004	(R,R)-butanediol dehydrogenase / diacetyl reductase [EC:1.1.1.4 1.1.1.303]	27	14745	5168	2085	963	52030	62	43	73	40
K03366	(R,R)-butanediol dehydrogenase / diacetyl reductase [EC:1.1.1.4 1.1.1.303]	267	3048	7425	4393	6777	11561	11155	8155	9267	525
K11517	(S)-2-hydroxy-acid oxidase [EC:1.1.3.15]	0	0	0	1	17	0	2	1	0	0
K07056	;16S rRNA (cytidine1402-2'-O)-methyltransferase [EC:2.1.1.198]	85469	229145	99362	142141	146178	79157	79054	37223	76061	42435
K01471	;6-aminohexanoate-cyclic-dimer hydrolase [EC:3.5.2.12]	4	1087	41	6193	1474	192	38	46	39	4
K07213	;copper chaperone	83503	136601	55975	102716	78706	34048	6288	9145	13194	2758
K06982	;pantoate kinase [EC:2.7.1.169]	0	0	0	0	0	0	16	150	28	19
K06967	;tRNA (adenine-N(1)-)-methyltransferase [EC:2.1.1.36]	680	790	43575	245	5065	39335	25044	4904	4883	19627
K07055	;tRNA wybutosine-synthesizing protein 2 [EC:2.1.1.-]	1	0	1	2	18	236	88	100	578	2
K00645	[acyl-carrier-protein] S-malonyltransferase [EC:2.3.1.39]	84706	141958	82917	126155	98055	76519	73848	31722	60114	39489
K01910	[citrate (pro-3S)-lyase] ligase [EC:6.2.1.22]	47	99	3916	82	1820	1641	1417	1114	2716	13504
K00990	[protein-PII] uridylyltransferase [EC:2.7.7.59]	83124	128503	56833	111915	81274	37058	48064	22016	42055	36207
K03715	1,2-diacylglycerol 3-beta-galactosyltransferase [EC:2.4.1.46]	49	2	42	75	780	3	24	76	47	8
K03429	1,2-diacylglycerol 3-glucosyltransferase [EC:2.4.1.157]	835	540	3482	421	21544	10318	343	610	517	74
K13677	1,2-diacylglycerol-3-glucose alpha-1,2-glucosyltransferase [EC:2.4.1.208]	0	0	0	0	6	0	0	0	0	0
K08967	1,2-dihydroxy-3-keto-5-methylthiopentene dioxygenase [EC:1.13.11.53 1.13.11.54]	165543	2212	87336	5431	19434	58228	522	3245	2496	739
K14583	1,2-dihydroxynaphthalene dioxygenase [EC:1.13.11.56]	5	11	547	2613	745	2396	29	216	22	8
K00086	1,3-propanediol dehydrogenase [EC:1.1.1.202]	239	438	35	51	198	56	75	237	82	12
K00700	1,4-alpha-glucan branching enzyme [EC:2.4.1.18]	84141	60272	69868	109427	86564	75331	35484	18276	32720	37953
K02548	1,4-dihydroxy-2-naphthoate octaprenyltransferase [EC:2.5.1.74];1,4-dihydroxy-2-naphthoate octaprenyltransferase [EC:2.5.1.74 2.5.1.-];1,4-dihydroxy-2-naphthoate octaprenyltransferase [EC:2.5.1.-]	85103	23866	53431	16214	27733	65251	22745	27685	72423	74892
K12073	1,4-dihydroxy-2-naphthoyl-CoA thioesterase [EC:3.1.2.-];1,4-dihydroxy-2-naphthoyl-CoA hydrolase [EC:3.1.2.28]	2	0	6	60	945	14	95	25	14	6
K11785	1,4-dihydroxy-6-naphthoate synthase [EC:1.14.-.-]	0	2	78	5	6	616	1	1	1	1
K12986	1,5-rhamnosyltransferase [EC:2.4.1.-]	0	0	0	0	1	0	0	0	0	0
K05783	1,6-dihydroxycyclohexa-2,4-diene-1-carboxylate dehydrogenase [EC:1.3.1.25]	31	1125	43813	666	2023	35186	436	1678	1480	1703
K00071	11beta-hydroxysteroid dehydrogenase [EC:1.1.1.146]	0	0	0	0	4	0	0	0	0	0
K05369	15,16-dihydrobiliverdin:ferredoxin oxidoreductase [EC:1.3.7.2]	0	0	0	2	142	0	3	2	2	2
K02528	16S rRNA (adenine1518-N6/adenine1519-N6)-dimethyltransferase [EC:2.1.1.182];dimethyladenosine transferase [EC:2.1.1.-]	84738	140883	83116	124164	97862	77904	75550	31307	60099	39496
K02860	16S rRNA processing protein RimM	84734	140866	83011	124101	97626	77893	75385	31124	59774	39500
K00655	1-acyl-sn-glycerol-3-phosphate acyltransferase [EC:2.3.1.51]	251742	278833	200895	237468	189232	195169	121755	53073	103378	48284
K01062	1-alkyl-2-acetylglycerophosphocholine esterase [EC:3.1.1.47]	1	8	3	46	414	322	1	1	1	0
K01505	1-aminocyclopropane-1-carboxylate deaminase [EC:3.5.99.7]	82774	1939	44247	9818	8817	32952	2455	8378	19938	2259
K00099	1-deoxy-D-xylulose-5-phosphate reductoisomerase [EC:1.1.1.267]	84626	101566	82273	39196	69011	69294	71195	27172	53253	37677
K01662	1-deoxy-D-xylulose-5-phosphate synthase [EC:2.2.1.7]	84241	140912	82654	126241	95248	69789	73797	31534	60528	39511
K11948	1-hydroxy-2-naphthoate dioxygenase [EC:1.13.11.38]	2	1	1	0	2	2	2	1	23	0
K01771	1-phosphatidylinositol phosphodiesterase [EC:4.6.1.13]	4	199	61	10	54	529	24	7	18	10
K00882	1-phosphofructokinase [EC:2.7.1.56]	83330	1790	64992	8838	8369	99807	26573	9487	11249	23573
K13921	1-propanol dehydrogenase	0	3	137	35	535	53	0	2	0	2
K00294	1-pyrroline-5-carboxylate dehydrogenase [EC:1.5.1.12]	767	5026	4514	10550	7388	1603	3617	6028	16163	2906
K00596	2,2-dialkylglycine decarboxylase (pyruvate) [EC:4.1.1.64]	2	30	33	529	15	199	42	252	26	3
K00674	2,3,4,5-tetrahydropyridine-2-carboxylate N-succinyltransferase [EC:2.3.1.117]	83717	135797	81797	117138	91136	77950	51745	25857	57279	38708
K01119	2',3'-cyclic-nucleotide 2'-phosphodiesterase [EC:3.1.4.16]	387	8990	8214	6830	13509	11989	32595	15579	29587	49719
K01121	2',3'-cyclic-nucleotide 3'-phosphodiesterase [EC:3.1.4.37]	0	0	1	1	4	0	0	0	1	0
K00216	2,3-dihydro-2,3-dihydroxybenzoate dehydrogenase [EC:1.3.1.28]	25	1026	285	993	2600	370	2734	2863	5711	33860
K10620	2,3-dihydroxy-2,3-dihydro-p-cumate dehydrogenase [EC:1.3.1.58]	0	0	0	4	2	0	0	2	0	0
K05711	2,3-dihydroxy-2,3-dihydrophenylpropionate dehydrogenase [EC:1.3.1.87];2,3-dihydroxy-2,3-dihydrophenylpropionate dehydrogenase [EC:1.3.1.-]	16	116	804	840	711	2910	418	907	546	1519
K14333	2,3-dihydroxybenzoate decarboxylase [EC:4.1.1.46]	19	32942	783	78497	24407	2589	2390	1439	1532	53
K02312	2,3-dihydroxybenzoate-AMP ligase [EC:2.7.7.58]	27	294	11320	1092	1753	1404	1294	893	2338	11990
K14751	2,3-dihydroxyethylbenzene 1,2-dioxygenase [EC:1.13.11.-]	6	204	527	380	593	2403	13	186	15	7
K10621	2,3-dihydroxy-p-cumate-3,4-dioxygenase [EC:1.13.11.-]	0	0	0	4	2	0	0	0	0	0
K05713	2,3-dihydroxyphenylpropionate 1,2-dioxygenase [EC:1.13.11.16]	5	152	179	323	552	255	2774	2198	1805	1543
K08965	2,3-diketo-5-methylthiopentyl-1-phosphate enolase [EC:3.1.3.77]	27	422	24	6	56	15	13	10	9	2
K10676	2,4-dichlorophenol 6-monooxygenase [EC:1.14.13.20]	5	320	1164	2034	726	234	18	26	8	3
K00219	2,4-dienoyl-CoA reductase (NADPH2) [EC:1.3.1.34]	82833	1269	47272	7918	28733	62363	10359	14127	35718	36899
K05913	2,4'-dihydroxyacetophenone dioxygenase [EC:1.13.11.41]	5	9	17222	344	304	13426	9	55	16	6
K02510	2,4-dihydroxyhept-2-ene-1,7-dioic acid aldolase [EC:4.1.2.-]	517	173640	57852	194755	86269	55436	5246	8917	14645	6969
K14654	2,5-diamino-6-(ribosylamino)-4(3H)-pyrimidinone 5'-phosphate reductase [EC:1.1.1.302]	0	0	0	0	4	0	5	24	18	0
K05885	2,5-diketo-D-gluconate reductase [EC:1.1.1.274]	49	772	5821	9486	1613	3503	264	1709	468	40
K06221	2,5-diketo-D-gluconate reductase A [EC:1.1.1.274]	27	521	14553	2287	4092	28115	2479	1967	1425	75
K06222	2,5-diketo-D-gluconate reductase B [EC:1.1.1.274]	41	1368	50353	1265	3129	37587	1484	1851	3468	16109
K10222	2,6-dioxo-6-phenylhexa-3-enoate hydrolase [EC:3.7.1.8]	5	81	526	384	538	2404	13	186	15	7
K00561	23S rRNA (adenine2085-N6)-dimethyltransferase [EC:2.1.1.184];rRNA (adenine-N6-)-methyltransferase [EC:2.1.1.48]	10	13	2484	6	159	1149	1	1	2	1
K00563	23S rRNA (guanine745-N1)-methyltransferase [EC:2.1.1.187];rRNA (guanine-N1-)-methyltransferase [EC:2.1.1.51]	82990	713	48374	392	4900	43158	5685	5971	10708	34384
K06182	23S rRNA pseudouridine2604 synthase [EC:5.4.99.21];ribosomal large subunit pseudouridine synthase F [EC:5.4.99.12]	82848	89064	54972	17320	76557	33482	5599	7130	15391	36029
K06179	23S rRNA pseudouridine955/2504/2580 synthase [EC:5.4.99.24];ribosomal large subunit pseudouridine synthase C [EC:5.4.99.12]	83605	130609	56557	111341	83055	35606	12082	14679	35889	36055
K01975	2'-5' RNA ligase [EC:6.5.1.-]	83411	163069	34255	188770	85483	43347	11296	14282	26762	14913
K06694	26S proteasome non-ATPase regulatory subunit 10	1	2	6354	13	253	3730	2	2	2	1
K08070	2-alkenal reductase [EC:1.3.1.74]	83319	1545	4337	9888	10001	3028	44639	8535	10889	17671
K13941	2-amino-4-hydroxy-6-hydroxymethyldihydropteridine diphosphokinase / dihydropteroate synthase [EC:2.7.6.3 2.5.1.15]	0	0	0	0	0	0	2	0	4	0
K00950	2-amino-4-hydroxy-6-hydroxymethyldihydropteridine pyrophosphokinase [EC:2.7.6.3];2-amino-4-hydroxy-6-hydroxymethyldihydropteridine diphosphokinase [EC:2.7.6.3]	166836	143139	116054	123525	99346	102355	53986	31911	74634	72405
K05825	2-aminoadipate transaminase [EC:2.6.1.-]	24	0	0	0	4	0	0	0	0	0
K08295	2-aminobenzoate-CoA ligase [EC:6.2.1.32]	18	35356	1800	94618	47785	1762	6394	4967	8059	278
K11084	2-aminoethylphosphonate transport system ATP-binding protein	0	102	175	1602	991	303	4	8	3	2
K11083	2-aminoethylphosphonate transport system permease protein	0	102	174	1602	991	303	2	5	3	2
K11082	2-aminoethylphosphonate transport system permease protein	0	102	175	1602	889	303	4	8	3	2
K11081	2-aminoethylphosphonate transport system substrate-binding protein	0	102	175	1602	991	303	4	8	3	2
K09469	2-aminoethylphosphonate-pyruvate transaminase	0	0	0	0	1	0	0	0	0	0
K03430	2-aminoethylphosphonate-pyruvate transaminase [EC:2.6.1.37]	236	32711	36835	80766	25580	27031	2939	2036	7343	33903
K13659	2-beta-glucuronyltransferase [EC:2.4.1.264]	0	4	2	44	405	223	1	0	1	0
K08686	2-chlorobenzoate 1,2-dioxygenase [EC:1.14.12.13]	14	15	14435	716	1021	13021	14	179	37	10
K01770	2-C-methyl-D-erythritol 2,4-cyclodiphosphate synthase [EC:4.6.1.12]	84467	89228	67090	26328	63276	62905	28968	14358	34831	36204
K12506	2-C-methyl-D-erythritol 4-phosphate cytidylyltransferase / 2-C-methyl-D-erythritol 2,4-cyclodiphosphate synthase [EC:2.7.7.60 4.6.1.12]	444	102683	29303	192549	62022	9358	85449	25540	33412	2623
K00991	2-C-methyl-D-erythritol 4-phosphate cytidylyltransferase [EC:2.7.7.60]	84465	89238	64615	26327	63420	61896	30350	16734	40342	36302
K00883	2-dehydro-3-deoxygalactonokinase [EC:2.7.1.58]	46	50597	27640	89620	53463	19471	7089	8901	17287	6830
K01630	2-dehydro-3-deoxyglucarate aldolase [EC:4.1.2.20]	371	1418	169	3130	5657	79	149	549	516	591
K00874	2-dehydro-3-deoxygluconokinase [EC:2.7.1.45]	2078	142614	120077	99435	68580	56310	15519	19009	37197	80415
K12660	2-dehydro-3-deoxy-L-rhamnonate aldolase [EC:4.1.2.-]	0	3	137	34	526	53	0	2	0	3
K01631	2-dehydro-3-deoxyphosphogalactonate aldolase [EC:4.1.2.21]	44	48659	28716	88818	53083	20543	4773	5237	7435	6329
K01625	2-dehydro-3-deoxyphosphogluconate aldolase / 4-hydroxy-2-oxoglutarate aldolase [EC:4.1.2.14 4.1.3.16]	168792	206495	187091	212679	180875	87961	46438	52242	121976	210008
K01627	2-dehydro-3-deoxyphosphooctonate aldolase (KDO 8-P synthase) [EC:2.5.1.55]	83835	139247	61058	117514	88094	35459	49363	25164	56799	39079
K00077	2-dehydropantoate 2-reductase [EC:1.1.1.169]	167554	209960	133739	123535	107179	88237	46337	20478	38080	37665
K00065	2-deoxy-D-gluconate 3-dehydrogenase [EC:1.1.1.125]	328	20471	30122	21405	11873	10948	9150	8567	12836	13537
K10797	2-enoate reductase [EC:1.3.1.31]	26	30	3164	8	238	437	107	80	32	14
K01560	2-haloacid dehalogenase [EC:3.8.1.2]	82956	184210	58808	204968	90964	40637	13178	16344	29046	3922
K08966	2-hydroxy-3-keto-5-methylthiopentenyl-1-phosphate phosphatase [EC:3.1.3.77]	3	424	37	8	86	101	23	84	144	6
K00042	2-hydroxy-3-oxopropionate reductase [EC:1.1.1.60]	83474	170080	69615	186758	103381	60286	4759	4346	4769	1051
K05714	2-hydroxy-6-ketonona-2,4-dienedioic acid hydrolase [EC:3.7.1.-]	19	227	1897	860	1125	3365	2812	2566	1913	1558
K10702	2-hydroxy-6-oxohepta-2,4-dienoate hydroxylase [EC:3.7.1.-]	0	15	1	2	0	1	0	2	0	0
K05977	2'-hydroxybiphenyl-2-sulfinate desulfinase [EC:3.13.1.3]	8	14	13800	58	166	10908	12	10	10	11
K14584	2-hydroxychromene-2-carboxylate isomerase [EC:5.99.1.4]	6	209	606	745	733	2558	47	499	44	8
K07535	2-hydroxycyclohexanecarboxyl-CoA dehydrogenase [EC:1.1.1.-]	6	126	1888	4905	990	1157	2484	2278	1414	42
K00109	2-hydroxyglutarate dehydrogenase [EC:1.1.99.2]	0	83	4	1760	997	0	14	46	33	4
K05281	2'-hydroxyisoflavone reductase [EC:1.3.1.45]	0	241	50	17	229	267	299	436	456	23
K01649	2-isopropylmalate synthase [EC:2.3.3.13]	168001	191633	98094	226987	147338	82409	96376	42097	78570	41135
K02526	2-keto-3-deoxygluconate permease	198	1186	184	98	3702	127	16	121	38	55
K13876	2-keto-3-deoxy-L-arabinonate dehydratase [EC:4.2.1.43]	0	0	0	0	2	0	0	0	0	0
K02554	2-keto-4-pentenoate hydratase [EC:4.2.1.80]	14	4595	2130	2083	2402	3758	834	1398	794	1567
K07536	2-ketocyclohexanecarboxyl-CoA hydrolase [EC:3.1.2.-]	0	28	712	3736	531	801	21	82	12	2
K01720	2-methylcitrate dehydratase [EC:4.2.1.79]	77	79974	72212	18423	30843	58323	559	4752	13012	622
K01659	2-methylcitrate synthase [EC:2.3.3.5]	82849	83186	55310	17330	31380	58362	38418	10865	29173	34868
K03184	2-octaprenyl-3-methyl-6-methoxy-1,4-benzoquinol hydroxylase [EC:1.14.13.-]	25	281	584	592	7468	437	3102	2662	8855	34123
K03185	2-octaprenyl-6-methoxyphenol hydroxylase [EC:1.14.13.-]	82896	176692	54842	202449	94385	34770	15770	19934	47827	36186
K01616	2-oxoglutarate decarboxylase [EC:4.1.1.71]	4	9	140	144	60	300	9	14	29	2
K00164	2-oxoglutarate dehydrogenase E1 component [EC:1.2.4.2]	83278	131427	76944	123677	74356	66332	15824	21527	52705	38434
K00658	2-oxoglutarate dehydrogenase E2 component (dihydrolipoamide succinyltransferase) [EC:2.3.1.61]	83712	146324	75537	127956	81493	65152	19674	26772	65963	41893
K00174	2-oxoglutarate ferredoxin oxidoreductase subunit alpha [EC:1.2.7.3]	2392	50197	11629	86057	35089	4947	83797	20822	21845	2924
K00175	2-oxoglutarate ferredoxin oxidoreductase subunit beta [EC:1.2.7.3]	2398	50197	12433	86113	35229	4947	84273	20992	22151	2952
K00176	2-oxoglutarate ferredoxin oxidoreductase subunit delta [EC:1.2.7.3]	1349	40725	1404	79929	28712	280	58252	11175	7794	1031
K00177	2-oxoglutarate ferredoxin oxidoreductase subunit gamma [EC:1.2.7.3]	1479	40726	2489	80196	28723	461	58653	11566	7817	1490
K02509	2-oxo-hept-3-ene-1,7-dioate hydratase [EC:4.2.1.-]	54	39553	43493	96156	51201	49688	3034	5413	10349	6303
K11381	2-oxoisovalerate dehydrogenase E1 component [EC:1.2.4.4]	1084	47448	5419	94024	42490	259	8251	13614	44742	5658
K00166	2-oxoisovalerate dehydrogenase E1 component, alpha subunit [EC:1.2.4.4]	82900	45901	45255	92217	29158	33845	443	2492	2541	581
K00167	2-oxoisovalerate dehydrogenase E1 component, beta subunit [EC:1.2.4.4]	82800	45924	44971	92217	29162	33835	449	2529	2564	582
K09699	2-oxoisovalerate dehydrogenase E2 component (dihydrolipoyl transacylase) [EC:2.3.1.168]	60	45886	43743	86752	27785	33429	388	2357	2486	544
K00186	2-oxoisovalerate ferredoxin oxidoreductase, alpha subunit [EC:1.2.7.7]	0	0	0	1070	0	0	96	194	298	14
K00187	2-oxoisovalerate ferredoxin oxidoreductase, beta subunit [EC:1.2.7.7]	0	0	0	1070	0	0	96	194	298	14
K05715	2-phosphoglycerate kinase [EC:2.7.2.-]	1	0	17	5598	447	0	1	2	1	2
K14941	2-phospho-L-lactate guanylyltransferase [EC:2.7.7.68]	20	294	11371	2374	2195	2615	2553	2095	1578	72
K05979	2-phosphosulfolactate phosphatase [EC:3.1.3.71]	518	9539	515	13503	6015	1021	2912	3365	1910	102
K10221	2-pyrone-4,6-dicarboxylate lactonase [EC:3.1.1.57]	14	457	1891	2715	17498	3499	2687	1653	2020	1537
K02551	2-succinyl-5-enolpyruvyl-6-hydroxy-3-cyclohexene-1-carboxylate synthase [EC:2.2.1.9]	752	9714	25619	4225	9442	30423	9249	10167	25811	36817
K08680	2-succinyl-6-hydroxy-2,4-cyclohexadiene-1-carboxylate synthase [EC:4.2.99.20]	29	196	3806	2322	2322	1752	3196	3481	8547	33851
K01082	3'(2'), 5'-bisphosphate nucleotidase [EC:3.1.3.7]	0	0	0	0	2	0	20	32	19	1
K05712	3-(3-hydroxy-phenyl)propionate hydroxylase [EC:1.14.13.-];3-(3-hydroxy-phenyl)propionate hydroxylase [EC:1.14.13.127]	81	88994	24434	26824	28379	13820	8683	9046	14830	2541
K05296	3(or 17)beta-hydroxysteroid dehydrogenase [EC:1.1.1.51]	0	0	0	0	12	0	1	0	0	0
K13238	3,2-trans-enoyl-CoA isomerase, mitochondrial [EC:5.3.3.8]	0	3	0	260	56	0	583	1212	385	38
K14652	3,4-dihydroxy 2-butanone 4-phosphate synthase / GTP cyclohydrolase II [EC:4.1.99.12 3.5.4.25]	251398	281581	198872	253060	207909	167310	141594	72691	142044	79743
K02858	3,4-dihydroxy 2-butanone 4-phosphate synthase [EC:4.1.99.12]	83208	95347	59578	14689	12690	63020	42886	12949	22668	53089
K00455	3,4-dihydroxyphenylacetate 2,3-dioxygenase [EC:1.13.11.15]	12	20	27084	1312	2418	19467	684	1675	1634	5795
K01120	3',5'-cyclic-nucleotide phosphodiesterase [EC:3.1.4.17]	5	5305	206	6495	2270	130	111	330	217	24
K08078	3a,7a,12a-trihydroxy-5b-cholest-24-enoyl-CoA hydratase [EC:4.2.1.107]	5	8	525	281	424	2487	11	176	13	6
K00038	3alpha(or 20beta)-hydroxysteroid dehydrogenase [EC:1.1.1.53]	27	821	11927	1513	1583	5136	2660	2237	1449	76
K00037	3-alpha-hydroxysteroid dehydrogenase [EC:1.1.1.50]	10	1032	9358	3685	1359	6280	276	1990	11963	319
K01857	3-carboxy-cis,cis-muconate cycloisomerase [EC:5.5.1.2]	101	123257	64280	101103	53114	58358	6353	8038	13615	6389
K03336	3D-(3,5/4)-trihydroxycyclohexane-1,2-dione hydrolase [EC:3.7.1.-]	85	47602	32906	92286	28503	22327	7044	8546	15333	17134
K08092	3-dehydro-L-gulonate 2-dehydrogenase [EC:1.1.1.130]	191	4	162	39	1947	58	2	101	2	49
K03078	3-dehydro-L-gulonate-6-phosphate decarboxylase [EC:4.1.1.85]	12	15	3308	50	2087	502	2337	1356	4354	32100
K03081	3-dehydro-L-gulonate-6-phosphate decarboxylase [EC:4.1.1.85]	11	21	2609	44	570	2251	11	16	11	7
K13832	3-dehydroquinate dehydratase / shikimate dehydrogenase [EC:4.2.1.10 1.1.1.25]	390	0	3	2141	2988	2	237	598	658	53
K03785	3-dehydroquinate dehydratase I [EC:4.2.1.10]	345	332	3578	720	7642	10756	262	704	861	103
K03786	3-dehydroquinate dehydratase II [EC:4.2.1.10]	84113	148110	118241	124266	93769	95696	52895	29130	59249	40887
K01735	3-dehydroquinate synthase [EC:4.2.3.4]	84595	140670	84679	129809	97142	79293	73508	30814	59804	39038
K09483	3-dehydroshikimate dehydratase [EC:4.2.1.-]	9	9	11	50	34	7	14	7	11	13
K04708	3-dehydrosphinganine reductase [EC:1.1.1.102]	0	0	0	2	35	0	583	1212	384	38
K00568	3-demethylubiquinone-9 3-methyltransferase [EC:2.1.1.- 2.1.1.64]	165822	343607	126929	248114	193003	78996	22955	29511	74701	71126
K13853	3-deoxy-7-phosphoheptulonate synthase / chorismate mutase [EC:2.5.1.54 5.4.99.5]	57	849	190	11230	2114	374	43	200	39	8
K03856	3-deoxy-7-phosphoheptulonate synthase [EC:2.5.1.54]	877	659	3944	5963	7252	1625	22959	9237	15194	732
K01626	3-deoxy-7-phosphoheptulonate synthase [EC:2.5.1.54]	248851	134003	155932	128532	117252	144263	56703	32951	79443	110218
K03270	3-deoxy-D-manno-octulosonate 8-phosphate phosphatase (KDO 8-P phosphatase) [EC:3.1.3.45]	83960	88614	58821	20987	59588	32415	41604	16164	41698	24191
K11211	3-deoxy-D-manno-octulosonic acid kinase [EC:2.7.1.-]	30	1308	78	10899	12421	265	3128	4264	20163	34403
K02527	3-deoxy-D-manno-octulosonic-acid transferase [EC:2.-.-.-]	83837	139250	59308	115022	88197	32388	52689	30136	68706	39713
K00979	3-deoxy-manno-octulosonate cytidylyltransferase (CMP-KDO synthetase) [EC:2.7.7.38]	83832	145297	61043	115779	87750	35684	49059	25700	56984	26972
K13831	3-hexulose-6-phosphate synthase / 6-phospho-3-hexuloisomerase [EC:4.1.2.43 5.3.1.27]	0	0	0	0	6	0	35	121	135	6
K08093	3-hexulose-6-phosphate synthase [EC:4.1.2.43]	83	28	329	416	31355	301	70	159	162	36
K00021	3-hydroxy-3-methylglutaryl-CoA reductase [EC:1.1.1.34];hydroxymethylglutaryl-CoA reductase (NADPH) [EC:1.1.1.34]	7	143	8	17	84	7	2597	2210	7077	21311
K01825	3-hydroxyacyl-CoA dehydrogenase / enoyl-CoA hydratase / 3-hydroxybutyryl-CoA epimerase / enoyl-CoA isomerase [EC:1.1.1.35 4.2.1.17 5.1.2.3 5.3.3.8]	331184	278	153368	1288	16505	112409	17280	29656	104342	138624
K01782	3-hydroxyacyl-CoA dehydrogenase / enoyl-CoA hydratase / 3-hydroxybutyryl-CoA epimerase [EC:1.1.1.35 4.2.1.17 5.1.2.3]	165764	229999	130921	314299	134243	93112	106700	47848	103818	103597
K07516	3-hydroxyacyl-CoA dehydrogenase [EC:1.1.1.35]	238	187458	50145	274195	146806	35129	13922	14598	24106	2734
K00452	3-hydroxyanthranilate 3,4-dioxygenase [EC:1.13.11.6]	29	32521	282	80263	31267	547	2498	6032	18235	2644
K00019	3-hydroxybutyrate dehydrogenase [EC:1.1.1.30]	82893	172607	69827	199048	104185	63713	6643	9064	14953	1399
K15016	3-hydroxybutyryl-CoA dehydratase / 3-hydroxyacyl-CoA dehydrogenase [EC:4.2.1.55 1.1.1.35]	0	12	0	0	0	0	0	0	0	0
K01715	3-hydroxybutyryl-CoA dehydratase [EC:4.2.1.55]	778	2696	18788	23303	21329	3539	26638	10049	18254	3523
K00074	3-hydroxybutyryl-CoA dehydrogenase [EC:1.1.1.157]	84537	226730	111827	146797	98246	114645	74492	32731	58794	7661
K01716	3-hydroxydecanoyl-[acyl-carrier-protein] dehydratase [EC:4.2.1.60]	82813	50877	43022	96305	53240	31105	9570	13226	34801	35401
K11337	3-hydroxyethyl bacteriochlorophyllide a dehydrogenase [EC:1.-.-.-]	8	497	136	3951	1660	9	353	340	329	75
K00020	3-hydroxyisobutyrate dehydrogenase [EC:1.1.1.31]	166079	297800	126673	321236	147853	110134	59603	38573	87579	74937
K15019	3-hydroxypropionyl-coenzyme A dehydratase [EC:4.2.1.116]	0	3	1	1	0	1	0	1	2	0
K00052	3-isopropylmalate dehydrogenase [EC:1.1.1.85]	84620	139396	83229	131625	98412	78519	87239	32886	62080	39567
K01703	3-isopropylmalate/(R)-2-methylmalate dehydratase large subunit [EC:4.2.1.33 4.2.1.35]	169134	360579	200951	287728	226648	175932	130366	60547	121325	79386
K01704	3-isopropylmalate/(R)-2-methylmalate dehydratase small subunit [EC:4.2.1.33 4.2.1.35]	169165	439769	207746	290969	227649	176240	130576	60570	121365	79387
K00606	3-methyl-2-oxobutanoate hydroxymethyltransferase [EC:2.1.2.11]	84201	212542	94940	287486	143230	80409	50460	27718	57661	39291
K01968	3-methylcrotonyl-CoA carboxylase alpha subunit [EC:6.4.1.4]	82859	129576	57755	112840	62342	38600	4622	10269	26392	3103
K01969	3-methylcrotonyl-CoA carboxylase beta subunit [EC:6.4.1.4]	82889	129573	71617	113763	63114	66525	9490	14290	34314	23319
K08693	3'-nucleotidase [EC:3.1.3.6]	23	37996	2653	77893	23605	1140	87	139	84	138
K03182	3-octaprenyl-4-hydroxybenzoate carboxy-lyase UbiD [EC:4.1.1.-]	83238	93183	54646	31708	20874	33070	41892	15485	33121	35556
K03186	3-octaprenyl-4-hydroxybenzoate carboxy-lyase UbiX [EC:4.1.1.-]	83131	99756	68124	32193	22596	45035	42287	16228	34140	35614
K12343	3-oxo-5-alpha-steroid 4-dehydrogenase 1 [EC:1.3.99.5]	0	2	0	0	17	0	1	1	0	0
K01027	3-oxoacid CoA-transferase [EC:2.8.3.5]	0	0	17	1	0	0	0	0	0	0
K01028	3-oxoacid CoA-transferase subunit A [EC:2.8.3.5]	82885	88960	72986	29405	42545	66809	6246	13073	31793	3306
K01029	3-oxoacid CoA-transferase subunit B [EC:2.8.3.5]	82950	90788	73179	29594	44121	66553	61906	18921	33793	15713
K00059	3-oxoacyl-[acyl-carrier protein] reductase [EC:1.1.1.100]	336255	982311	488262	990010	559596	355018	190721	123263	208945	143215
K00647	3-oxoacyl-[acyl-carrier-protein] synthase I [EC:2.3.1.41]	166270	169072	111007	189407	129647	71838	14284	22006	68208	45174
K09458	3-oxoacyl-[acyl-carrier-protein] synthase II [EC:2.3.1.179]	85066	355055	173500	405385	217562	137481	78063	39347	79733	46062
K00648	3-oxoacyl-[acyl-carrier-protein] synthase III [EC:2.3.1.180]	168699	266460	170409	390066	211489	156948	88693	53337	109878	104437
K05553	3-oxoacyl-ACP synthase acyl carrier protein;act minimal PKS acyl carrier protein	0	2	59	4	6	440	1	1	1	1
K05551	3-oxoacyl-ACP synthase I [EC:2.3.1.-];act minimal PKS ketosynthase (KS/KS alpha) [EC:2.3.1.-]	0	1	58	3	2	434	0	0	1	1
K01031	3-oxoadipate CoA-transferase, alpha subunit [EC:2.8.3.6]	80	85821	25369	15849	26267	29299	125	136	233	95
K01032	3-oxoadipate CoA-transferase, beta subunit [EC:2.8.3.6]	82	85903	25371	15873	26284	29301	1630	1859	4911	638
K14727	3-oxoadipate enol-lactonase / 4-carboxymuconolactone decarboxylase [EC:3.1.1.24 4.1.1.44]	17	4349	1483	748	679	2414	66	174	354	159
K01055	3-oxoadipate enol-lactonase [EC:3.1.1.24]	82871	165205	78450	185034	64802	69053	9506	10814	16635	2728
K07823	3-oxoadipyl-CoA thiolase [EC:2.3.1.174]	15	250	39468	2957	6016	29342	49	1318	804	183
K05898	3-oxosteroid 1-dehydrogenase [EC:1.3.99.4]	9	166	1383	1092	399	263	2384	1443	1862	17
K13811	3'-phosphoadenosine 5'-phosphosulfate synthase [EC:2.7.7.4 2.7.1.25]	0	0	0	0	1	0	18	11	16	6
K00800	3-phosphoshikimate 1-carboxyvinyltransferase [EC:2.5.1.19]	84743	140875	96161	124164	98085	87835	73436	31090	59577	39468
K01083	3-phytase [EC:3.1.3.8]	82758	4321	25061	1778	7717	17950	332	728	1012	110
K02372	3R-hydroxymyristoyl ACP dehydrase [EC:4.2.1.-]	84353	143029	68728	126380	95563	48187	71060	28927	59502	39849
K11336	3-vinyl bacteriochlorophyllide hydratase [EC:4.2.1.-]	8	497	136	3951	1660	9	353	340	329	75
K11949	4-(2-carboxyphenyl)-2-oxobut-3-enoate aldolase [EC:4.1.2.34]	3	126	18	37	103	211	11	14	33	0
K10210	4,4'-diaponeurosporene oxidase [EC:1.-.-.-]	6	68	741	3	64	399	1	1	4	1
K10211	4,4'-diaponeurosporenoate glycosyltransferase [EC:2.4.1.-]	6	68	755	4	84	485	4	5	5	1
K04102	4,5-dihydroxyphthalate decarboxylase [EC:4.1.1.55]	6	3799	721	2940	16917	430	2343	1398	1475	28
K01724	4a-hydroxytetrahydrobiopterin dehydratase [EC:4.2.1.96]	82992	128758	55848	115451	97957	37827	14893	19530	43977	37289
K00705	4-alpha-glucanotransferase [EC:2.4.1.25]	83646	6265	48281	16879	32031	69401	9366	10779	14247	34820
K02853	4-alpha-L-fucosyltransferase [EC:2.4.1.-]	2	17	576	71	1941	191	1	6	3	6
K02619	4-amino-4-deoxychorismate lyase [EC:4.1.3.38]	82943	50405	60773	97631	60907	59882	42120	16466	37480	36036
K07264	4-amino-4-deoxy-L-arabinose transferase [EC:2.4.2.43];4-amino-4-deoxy-L-arabinose transferase [EC:2.-.-.-]	20	22	66338	164	2292	49570	49	1215	819	189
K07250	4-aminobutyrate aminotransferase / (S)-3-amino-2-methylpropionate transaminase [EC:2.6.1.19 2.6.1.22]	83096	8207	79088	38052	32498	96379	6653	11565	25049	11597
K13524	4-aminobutyrate aminotransferase / (S)-3-amino-2-methylpropionate transaminase [EC:2.6.1.19 2.6.1.22]	0	0	0	0	4	0	37	22	33	12
K00823	4-aminobutyrate aminotransferase [EC:2.6.1.19]	113	119825	20141	90921	32398	8507	5795	5024	9250	34190
K10219	4-carboxy-2-hydroxymuconate-6-semialdehyde dehydrogenase [EC:1.2.1.45];2-hydroxy-4-carboxymuconate semialdehyde hemiacetal dehydrogenase [EC:1.1.1.312]	13	426	1890	2437	17559	3571	2689	1601	2013	1537
K01607	4-carboxymuconolactone decarboxylase [EC:4.1.1.44]	165832	171764	147583	205115	94346	121840	16827	26068	55946	4179
K01904	4-coumarate--CoA ligase [EC:6.2.1.12]	14	130	11278	1613	622	1099	300	114	184	65
K05797	4-cresol dehydrogenase (hydroxylating) [EC:1.17.99.1]	5	0	1	33	607	0	6	14	187	16
K01815	4-deoxy-L-threo-5-hexosulose-uronate ketol-isomerase [EC:5.3.1.17]	768	22954	15366	4922	6691	2893	870	1702	660	220
K00919	4-diphosphocytidyl-2-C-methyl-D-erythritol kinase [EC:2.7.1.148]	84676	140652	82473	121805	93955	68394	71217	27042	53209	37597
K12254	4-guanidinobutyraldehyde dehydrogenase / NAD-dependent aldehyde dehydrogenase [EC:1.2.1.54 1.2.1.-]	82773	49	77603	298	2095	57771	213	5429	14426	829
K01666	4-hydroxy 2-oxovalerate aldolase [EC:4.1.3.39]	92	921	6497	3613	2967	9701	72645	12769	11141	14964
K03527	4-hydroxy-3-methylbut-2-enyl diphosphate reductase [EC:1.17.1.2]	84664	140708	82567	128143	94278	69070	71286	27262	53363	37719
K10218	4-hydroxy-4-methyl-2-oxoglutarate aldolase [EC:4.1.3.17]	18	11493	2000	5791	19424	4388	5204	2928	3570	1565
K14520	4-hydroxyacetophenone monooxygenase [EC:1.14.13.84]	8	6029	292	1033	227	2323	76	191	431	7
K01612	4-hydroxybenzoate decarboxylase [EC:4.1.1.61]	0	6	0	2	1	0	0	0	0	0
K06125	4-hydroxybenzoate hexaprenyltransferase [EC:2.5.1.-]	0	0	0	8	33	0	28	188	5	3
K03179	4-hydroxybenzoate octaprenyltransferase [EC:2.5.1.-]	83829	136008	61688	128385	91865	38066	51459	26974	63483	40949
K04105	4-hydroxybenzoate-CoA ligase [EC:6.2.1.27]	0	0	1	2788	7	0	2349	1150	1463	12
K04108	4-hydroxybenzoyl-CoA reductase subunit 2 [EC:1.3.99.20];4-hydroxybenzoyl-CoA reductase subunit alpha [EC:1.3.7.9];4-hydroxybenzoyl-CoA reductase subunit alpha [EC:1.3.99.20]	0	0	0	1337	28	0	0	0	0	0
K04109	4-hydroxybenzoyl-CoA reductase subunit beta [EC:1.3.99.20];4-hydroxybenzoyl-CoA reductase subunit 3 [EC:1.3.99.20];4-hydroxybenzoyl-CoA reductase subunit beta [EC:1.3.7.9]	0	0	0	1337	32	0	11	29	29	4
K04107	4-hydroxybenzoyl-CoA reductase subunit gamma [EC:1.3.7.9];4-hydroxybenzoyl-CoA reductase subunit 1 [EC:1.3.99.20]	0	0	0	1337	28	0	0	0	0	0
K01075	4-hydroxybenzoyl-CoA thioesterase [EC:3.1.2.23]	82783	33306	42812	83031	42074	30843	3483	3911	4770	1050
K00043	4-hydroxybutyrate dehydrogenase [EC:1.1.1.61]	3	1	3	65	73	1	2878	4158	10593	594
K14534	4-hydroxybutyryl-CoA dehydratase / vinylacetyl-CoA-Delta-isomerase [EC:4.2.1.120 5.3.3.3]	224	252	275	58	441	3	647	810	1306	58
K00483	4-hydroxyphenylacetate-3-hydroxylase large chain [EC:1.14.13.3]	12	921	17944	12250	4818	13835	92	1301	901	185
K00484	4-hydroxyphenylacetate-3-hydroxylase small chain [EC:1.14.13.3]	15	152	17874	1187	2108	14161	514	1404	1549	5751
K00457	4-hydroxyphenylpyruvate dioxygenase [EC:1.13.11.27]	82892	134567	99428	105929	66326	63714	14575	22610	55475	39079
K12658	4-hydroxyproline epimerase [EC:5.1.1.8]	30	9963	40216	8126	4879	29996	2218	3931	9934	1912
K00097	4-hydroxythreonine-4-phosphate dehydrogenase [EC:1.1.1.262]	84555	188446	63502	201484	137383	39525	50105	27306	59155	40919
K03152	4-methyl-5(b-hydroxyethyl)-thiazole monophosphate biosynthesis	83996	9305	37495	483	12304	35240	63365	13114	19139	34468
K01101	4-nitrophenyl phosphatase [EC:3.1.3.41]	50	611	3275	2180	1524	10304	146	401	144	21
K10220	4-oxalmesaconate hydratase [EC:4.2.1.83]	16	3848	2068	3581	18173	4231	405	743	599	1531
K01617	4-oxalocrotonate decarboxylase [EC:4.1.1.77]	96	111054	23292	83259	44039	16560	36270	6070	4878	583
K01821	4-oxalocrotonate tautomerase [EC:5.3.2.-]	598	239598	64669	198020	117679	48319	70524	10573	10084	1733
K06133	4'-phosphopantetheinyl transferase [EC:2.7.8.-]	156	81392	22134	12295	12426	4428	1517	3104	2994	13203
K09722	4-phosphopantoate---beta-alanine ligase [EC:6.3.2.36];hypothetical protein	0	0	0	0	0	0	16	150	28	19
K01093	4-phytase / acid phosphatase [EC:3.1.3.26 3.1.3.2]	11	3500	2630	3443	7156	3286	37	623	323	464
K01588	5-(carboxyamino)imidazole ribonucleotide mutase [EC:5.4.99.18]	84883	140865	83422	124096	96884	77097	73496	31236	60492	39480
K01589	5-(carboxyamino)imidazole ribonucleotide synthase [EC:6.3.4.18]	83366	131944	83177	122121	89779	77877	15790	21645	52765	38455
K04719	5,6-dimethylbenzimidazole biosynthesis protein BluB;5,6-dimethylbenzimidazole synthase [EC:1.14.99.40]	82815	45242	44463	93188	63529	33272	37071	9519	15650	1368
K00082	5-amino-6-(5-phosphoribosylamino)uracil reductase [EC:1.1.1.193]	7	31	3056	783	1373	2937	179	184	104	39
K00643	5-aminolevulinate synthase [EC:2.3.1.37]	42	50630	2535	103213	31162	3435	7043	8230	13759	1251
K14268	5-aminovalerate aminotransferase [EC:2.6.1.48]	82754	33	40990	141	1567	29802	56	1181	844	201
K01826	5-carboxymethyl-2-hydroxymuconate isomerase [EC:5.3.3.10]	216	87191	76029	20800	28406	49856	7725	12796	33442	42185
K00151	5-carboxymethyl-2-hydroxymuconic-semialdehyde dehydrogenase [EC:1.2.1.60]	50	1665	41546	12737	5017	49800	4963	8386	28995	8235
K03338	5-dehydro-2-deoxygluconokinase [EC:2.7.1.92]	64	46876	32914	91898	28466	22329	7376	8779	15764	18627
K01707	5-dehydro-4-deoxyglucarate dehydratase [EC:4.2.1.41]	28	14688	27096	3600	17862	20264	94	1406	857	203
K03337	5-deoxy-glucuronate isomerase [EC:5.3.1.-]	270	47716	32877	92030	31499	21965	7103	8571	15357	17149
K01934	5-formyltetrahydrofolate cyclo-ligase [EC:6.3.3.2]	84665	145794	80864	126774	64495	75094	75204	29682	59886	39437
K12253	5-guanidino-2-oxopentanoate decarboxylase [EC:4.1.1.75]	4	4	13505	23	148	10552	4	5	2	4
K07127	5-hydroxyisourate hydrolase [EC:3.5.2.17]	82902	135352	94078	97008	51803	82774	9385	11827	17644	3474
K07451	5-methylcytosine-specific restriction enzyme A [EC:3.1.21.-]	2	3	6357	13	262	3732	1855	1975	1469	9
K07452	5-methylcytosine-specific restriction enzyme B [EC:3.1.21.-]	4	5	2547	22	41	25841	11	4	4	9
K15023	5-methyltetrahydrofolate corrinoid/iron sulfur protein methyltransferase	0	0	0	1	49	0	6	31	42	2
K00548	5-methyltetrahydrofolate--homocysteine methyltransferase [EC:2.1.1.13]	85385	221215	69479	291166	174704	42054	88040	47390	85085	41298
K00549	5-methyltetrahydropteroyltriglutamate--homocysteine methyltransferase [EC:2.1.1.14]	83130	86762	78851	37144	62752	104982	49306	18854	32285	57724
K01244	5'-methylthioadenosine nucleosidase [EC:3.2.2.16]	0	0	0	0	1	0	0	0	0	0
K00772	5'-methylthioadenosine phosphorylase [EC:2.4.2.28]	83458	2395	37707	19020	34327	28728	7559	9661	16216	1052
K12960	5-methylthioadenosine/S-adenosylhomocysteine deaminase [EC:3.5.4.- 3.5.4.28]	2198	164355	4878	387203	127073	4729	23852	8008	9624	1637
K00899	5-methylthioribose kinase [EC:2.7.1.100]	304	1799	12446	6162	7002	1459	21177	3304	1634	342
K11751	5'-nucleotidase / UDP-sugar diphosphatase [EC:3.1.3.5 3.6.1.45]	43	45	1156	111	4003	386	9990	9847	38454	103693
K08722	5'-nucleotidase [EC:3.1.3.5]	161	137	779	70	3205	204	3072	2537	9066	33874
K08723	5'-nucleotidase [EC:3.1.3.5]	2	3	138	35	1879	56	1	5	2	4
K03787	5'-nucleotidase [EC:3.1.3.5]	84176	136842	67573	119385	92849	62647	70930	28605	58350	40801
K01081	5'-nucleotidase [EC:3.1.3.5]	83712	126032	72009	103724	83752	40964	73782	31249	65495	53078
K05921	5-oxopent-3-ene-1,2,5-tricarboxylate decarboxylase / 2-hydroxyhepta-2,4-diene-1,7-dioate isomerase [EC:4.1.1.68 5.3.3.-]	58	1562	86206	18520	30941	57318	798	4039	5831	6284
K01469	5-oxoprolinase (ATP-hydrolysing) [EC:3.5.2.9]	44	76611	3189	176514	58409	2339	4742	4251	3728	186
K14956	6 kDa early secretory antigenic target	2	3	135	0	17	3	2	2	24	0
K00794	6,7-dimethyl-8-ribityllumazine synthase [EC:2.5.1.78];riboflavin synthase beta chain [EC:2.5.1.-]	84228	184174	113938	209664	121271	93446	76630	36113	71535	40351
K11089	60 kDa SS-A/Ro ribonucleoprotein	20	31982	30218	79858	23916	23203	176	139	151	55
K01906	6-carboxyhexanoate--CoA ligase [EC:6.2.1.14]	143	1005	234	724	234	161	57	343	182	11
K14366	6-deoxyerythronolide B-6-hydroxylase [EC:1.14.-.-]	0	0	0	0	0	9	0	0	0	0
K07538	6-hydroxycyclohex-1-ene-1-carboxyl-CoA dehydrogenase [EC:1.1.1.-]	0	1	91	2858	119	0	39	34	46	2
K14974	6-hydroxynicotinate 3-monooxygenase [EC:1.14.13.114]	3	1183	6358	1611	494	3730	3	4	3	2
K07539	6-oxo-cyclohex-1-ene-carbonyl-CoA hydrolase [EC:3.7.1.-]	0	1	91	2218	114	0	39	34	46	2
K08094	6-phospho-3-hexuloisomerase [EC:5.3.1.27]	203	1093	217	5196	19696	295	60	239	87	68
K03339	6-phospho-5-dehydro-2-deoxy-D-gluconate aldolase [EC:4.1.2.29]	1	2	0	1	10	0	1	1	12	0
K01220	6-phospho-beta-galactosidase [EC:3.2.1.85]	8	86	734	21	162	1587	5	2	6	4
K01222	6-phospho-beta-glucosidase [EC:3.2.1.86]	125	768	9067	301	3676	5812	2631	1974	6807	32170
K01223	6-phospho-beta-glucosidase [EC:3.2.1.86]	617	1296	30427	647	9997	25854	4460	3355	9489	49513
K01103	6-phosphofructo-2-kinase / fructose-2,6-bisphosphatase [EC:2.7.1.105 3.1.3.46];fructose-2,6-bisphosphatase [EC:3.1.3.46]	71	5	10	11	33	4	108	961	1199	894
K00850	6-phosphofructokinase [EC:2.7.1.11]	85468	49860	39105	107816	81889	50001	40888	26801	51458	38260
K00033	6-phosphogluconate dehydrogenase [EC:1.1.1.44]	1025	58669	75987	115344	66381	67790	9174	10921	20362	36323
K07404	6-phosphogluconolactonase [EC:3.1.1.31]	288	2664	13358	4206	6208	8936	2618	3359	5205	20351
K01057	6-phosphogluconolactonase [EC:3.1.1.31]	83652	60629	61047	97070	59305	64348	13837	15813	31865	37376
K01737	6-pyruvoyl tetrahydrobiopterin synthase [EC:4.2.3.12]	84118	112188	63129	45806	72642	40930	83213	29702	61858	41238
K04071	6-pyruvoyltetrahydropterin 2'-reductase [EC:1.1.1.220]	1	0	0	0	0	0	45	10	49	75
K03574	7,8-dihydro-8-oxoguanine triphosphatase [EC:3.6.1.-]	85596	147696	93231	157239	122694	161628	117911	46658	84573	45894
K00076	7-alpha-hydroxysteroid dehydrogenase [EC:1.1.1.159]	70	43	920	874	1837	33	41662	11296	17369	910
K09457	7-cyano-7-deazaguanine reductase [EC:1.7.1.13]	100	53181	3569	104839	48502	11191	39082	12279	16857	1386
K06879	7-cyano-7-deazaguanine reductase [EC:1.7.1.13]	83242	84076	53195	14140	34631	32254	3408	5669	21510	34672
K00652	8-amino-7-oxononanoate synthase [EC:2.3.1.47]	83829	135948	67086	118068	89557	65226	47232	22525	53320	38754
K03575	A/G-specific adenine glycosylase [EC:3.2.2.-]	84272	140447	81273	123702	94050	77053	18315	24195	55678	39101
K01990	ABC-2 type transport system ATP-binding protein	88928	165989	149824	87331	141516	192003	134125	55127	90818	27476
K01992	ABC-2 type transport system permease protein	170357	191006	135252	165932	152287	199849	54961	47294	86995	25874
K13005	abequosyltransferase [EC:2.4.1.-]	0	0	0	31	0	0	0	0	0	0
K04769	AbrB family transcriptional regulator, stage V sporulation protein T	255	671	519	74	1253	204	715	790	203	103
K10952	accessory cholera enterotoxin	2	2	2	2	11	3	1023	705	2198	11925
K10936	accessory colonization factor AcfA	7	7	5	6	18	7	1552	1118	3294	24578
K10937	accessory colonization factor AcfB	2	2	2	2	11	3	1023	705	2198	11922
K10938	accessory colonization factor AcfC	2	643	680	25	155	805	1055	728	2258	12005
K10939	accessory colonization factor AcfD	7	8	6	7	28	7	1552	1119	3938	24624
K07813	accessory gene regulator B	546	814	3173	180	2017	1164	21906	4126	1442	286
K12268	accessory secretory protein Asp1	2	1	18	2	167	7752	1	2	3	1
K12269	accessory secretory protein Asp2	2	1	18	2	168	7760	1	2	3	1
K12270	accessory secretory protein Asp3	2	1	18	2	174	7759	1	2	3	1
K00132	acetaldehyde dehydrogenase (acetylating) [EC:1.2.1.10]	0	105	0	0	3	0	46	278	17	3
K04072	acetaldehyde dehydrogenase / alcohol dehydrogenase [EC:1.2.1.10 1.1.1.1]	1306	715	8041	2312	12380	21707	9219	9068	24105	71746
K04073	acetaldehyde dehydrogenase [EC:1.2.1.10]	33	880	2377	3228	2241	4341	36384	6061	4938	1851
K01034	acetate CoA-transferase alpha subunit [EC:2.8.3.8]	76	1568	250	540	1857	132	57072	7485	6258	13014
K01035	acetate CoA-transferase beta subunit [EC:2.8.3.8]	5	848	3	356	39	10	23	67	66	113
K00925	acetate kinase [EC:2.7.2.1]	84837	59443	30471	109676	70153	47618	139229	32428	62030	71503
K01574	acetoacetate decarboxylase [EC:4.1.1.4]	13	4007	197	12958	3601	1056	89	272	216	60
K00023	acetoacetyl-CoA reductase [EC:1.1.1.36]	82985	156747	16309	190438	106455	6216	9534	10324	22395	35002
K01907	acetoacetyl-CoA synthetase [EC:6.2.1.16]	82892	44230	46376	94659	45783	58337	12382	11840	20506	34148
K04766	acetoin utilization protein AcuA [EC:2.3.1.-]	9	424	53	10	212	190	483	176	87	27
K04767	acetoin utilization protein AcuB	653	622	1090	5632	3510	9534	1118	1771	3068	589
K04768	acetoin utilization protein AcuC	139	678	2853	1688	2462	27680	4129	3961	5179	215
K01575	acetolactate decarboxylase [EC:4.1.1.5]	373	652	14579	304	4585	11791	1979	2133	1694	61
K01652	acetolactate synthase I/II/III large subunit [EC:2.2.1.6]	250935	523430	194695	486007	274655	192539	133255	61852	103249	90766
K01653	acetolactate synthase I/III small subunit [EC:2.2.1.6]	84477	138287	80472	123840	91312	75844	52676	25618	46569	39461
K11258	acetolactate synthase II small subunit [EC:2.2.1.6]	14	269	578	524	7423	412	3042	2298	8226	33841
K10854	acetone carboxylase, alpha subunit [EC:6.4.1.6]	8	162	101	3036	1603	7	57	32	44	16
K10855	acetone carboxylase, beta subunit [EC:6.4.1.6]	0	139	94	3003	151	0	34	10	28	2
K10856	acetone carboxylase, gamma subunit [EC:6.4.1.6]	10	1247	123	7980	3059	7	60	64	53	18
K10701	acetophenone carboxylase [EC:6.4.1.-]	0	0	0	640	132	0	1	6	12	0
K03896	acetyl CoA:N6-hydroxylysine acetyl transferase [EC:2.3.1.102]	12	14	16407	79	1577	12396	165	31	259	149
K11263	acetyl-/propionyl-CoA carboxylase, biotin carboxylase, biotin carboxyl carrier protein [EC:6.3.4.14];acetyl/propionyl carboxylase subunit alpha	69	7279	32569	5142	20571	59467	5065	4091	2938	183
K02615	acetyl-CoA acetyltransferase [EC:2.3.1.-]	2	426	576	44	1868	262	9	12	5	4
K00632	acetyl-CoA acyltransferase [EC:2.3.1.16]	83104	235783	109031	197333	114352	58504	17073	23343	61243	71204
K07508	acetyl-CoA acyltransferase 2 [EC:2.3.1.16]	0	0	0	0	11	0	19	11	16	6
K00626	acetyl-CoA C-acetyltransferase [EC:2.3.1.9]	498277	566559	326255	552142	345644	258702	118113	82589	144617	86637
K02160	acetyl-CoA carboxylase biotin carboxyl carrier protein	84070	133320	62146	127104	95273	45526	67822	26119	54810	26326
K01962	acetyl-CoA carboxylase carboxyl transferase subunit alpha [EC:6.4.1.2]	83786	131942	60710	123186	92240	46156	48788	25097	47479	38032
K01963	acetyl-CoA carboxylase carboxyl transferase subunit beta [EC:6.4.1.2]	84036	131569	64259	123397	93382	47100	54172	29654	63173	59427
K01961	acetyl-CoA carboxylase, biotin carboxylase subunit [EC:6.4.1.2];acetyl-CoA carboxylase, biotin carboxylase subunit [EC:6.4.1.2 6.3.4.14]	168816	283457	166224	258389	207555	123644	122224	59580	116611	78565
K00194	acetyl-CoA decarbonylase/synthase complex subunit delta;carbon-monoxide dehydrogenase delta subunit [EC:1.2.99.2]	26	84	5	1803	2118	1	28	111	195	10
K01067	acetyl-CoA hydrolase [EC:3.1.2.1]	221	119638	52359	97544	56475	34167	2801	4942	2976	338
K01905	acetyl-CoA synthetase (ADP-forming) [EC:6.2.1.13]	2	0	1	71	19	0	32	121	52	7
K01895	acetyl-CoA synthetase [EC:6.2.1.1]	167164	297886	177961	322065	188737	149367	29681	43295	91408	43520
K01964	acetyl-CoA/propionyl-CoA carboxylase [EC:6.4.1.2 6.4.1.3]	2	0	20	0	23	0	14	169	8	0
K15036	acetyl-CoA/propionyl-CoA carboxylase [EC:6.4.1.2 6.4.1.3]	0	0	0	0	2	0	54	13	46	12
K00930	acetylglutamate kinase [EC:2.7.2.8];acetylglutamate/acetylaminoadipate kinase [EC:2.7.2.8 2.7.2.-]	168949	281395	151033	257743	190889	120468	125910	57175	118145	78678
K05831	acetyl-lysine deacetylase [EC:3.5.1.-]	5	83	23	7357	1432	0	17	69	42	6
K00818	acetylornithine aminotransferase [EC:2.6.1.11]	1176	11043	64748	17486	52008	68365	77431	16945	31909	5589
K01438	acetylornithine deacetylase [EC:3.5.1.16]	83691	137232	104016	125864	73540	67030	20469	26177	61291	39410
K00821	acetylornithine/N-succinyldiaminopimelate aminotransferase [EC:2.6.1.11 2.6.1.17]	166806	265848	168838	225170	100510	118091	21063	31518	72124	71248
K00543	acetylserotonin N-methyltransferase [EC:2.1.1.4]	0	0	0	0	0	0	6	17	7	2
K09474	acid phosphatase (class A) [EC:3.1.3.2]	14	3009	18578	5598	3121	13954	553	349	1107	12580
K03788	acid phosphatase (class B) [EC:3.1.3.2]	2	3	564	38	1958	175	41	62	13	9
K01078	acid phosphatase [EC:3.1.3.2]	6	1375	6567	6793	6774	4332	161	283	370	30
K03191	acid-activated urea channel	8	68	729	3	15	7781	1	2	1	0
K12147	acidic protein MsyB	2	3	138	35	1879	56	1	5	2	4
K01681	aconitate hydratase 1 [EC:4.2.1.3]	167424	222087	125541	139478	112599	104770	73908	33189	61359	41420
K01682	aconitate hydratase 2 [EC:4.2.1.3]	83018	80136	54696	18460	51463	32452	41045	14555	35211	35383
K15020	acryloyl-coenzyme A reductase [EC:1.3.1.84]	0	0	0	0	0	9	0	0	0	0
K14469	acrylyl-CoA reductase (NADPH) / 3-hydroxypropionyl-CoA dehydratase / 3-hydroxypropionyl-CoA synthetase [EC:1.3.1.84 4.2.1.116 6.2.1.36]	2	0	88	52	66	8	65	224	386	2
K07166	ACT domain-containing protein	631	245	1281	161	2288	9856	21395	3373	1425	284
K05552	act minimal PKS chain-length factor (CLF/KS beta) [EC:2.3.1.-];3-oxoacyl-ACP synthase II [EC:2.3.1.-]	0	1	58	3	2	434	0	0	1	1
K05692	actin beta/gamma 1	0	0	0	0	3	0	1	0	0	0
K14626	actinorhodin biosynthesis protein ActVIA	0	0	47	2	1	375	0	0	1	0
K02538	activator of the mannose operon, transcriptional antiterminator	18	87	3336	84	550	8985	8	13	16	6
K02078	acyl carrier protein	168741	231001	182326	144261	159032	153169	112497	56679	117067	77196
K08682	acyl carrier protein phosphodiesterase [EC:3.1.4.14]	7	9	566	41	1962	181	2220	1736	6100	19231
K13061	acyl homoserine lactone synthase [EC:2.3.1.184]	1	0	3746	7	77	2897	10	10	11	4
K13060	acyl homoserine lactone synthase [EC:2.3.1.184]	0	0	111	3	117	1	1	1	6	4
K13062	acyl homoserine lactone synthase [EC:2.3.1.184]	5	6	4	6	23	5	1085	864	1866	14790
K03921	acyl-[acyl-carrier-protein] desaturase [EC:1.14.19.2]	12	4533	242	8833	5701	1150	1088	3462	1681	77
K03922	acyl-[acyl-carrier-protein] desaturase [EC:1.14.19.2]	2	2	4	138	18	2	4	7	26	1
K05939	acyl-[acyl-carrier-protein]-phospholipid O-acyltransferase / long-chain-fatty-acid--[acyl-carrier-protein] ligase [EC:2.3.1.40 6.2.1.20]	272	78736	3749	181300	87816	497	72286	12983	11140	1171
K01303	acylaminoacyl-peptidase [EC:3.4.19.1]	3	8285	59	751	272	290	55	295	520	28
K06445	acyl-CoA dehydrogenase [EC:1.3.99.-]	82840	79621	66346	20651	18598	41996	36852	8808	24479	34818
K06446	acyl-CoA dehydrogenase [EC:1.3.99.-]	65	117859	11519	94218	32577	3948	164	684	243	83
K00249	acyl-CoA dehydrogenase [EC:1.3.99.3]	331584	656492	227837	694549	341770	175922	28571	36095	44399	3625
K01073	acyl-CoA hydrolase [EC:3.1.2.20]	2	98	2	5	1115	17	29	403	50	4
K00232	acyl-CoA oxidase [EC:1.3.3.6]	27	667	20494	772	1210	33452	2491	2067	1424	70
K12507	acyl-CoA synthetase [EC:6.2.1.-]	1	3	2	5	24	1	1	3	2	1
K07107	acyl-CoA thioester hydrolase [EC:3.1.2.-]	334030	430673	238412	436411	242817	201681	144539	71495	153959	75109
K10804	acyl-CoA thioesterase I [EC:3.1.2.- 3.1.1.5]	165676	159458	100425	24018	95834	60817	10392	16924	56684	71155
K10805	acyl-CoA thioesterase II [EC:3.1.2.-]	82865	49007	61724	96428	39228	65505	8751	10945	22693	34993
K10806	acyl-CoA thioesterase YciA [EC:3.1.2.-]	82951	130244	55556	103608	55833	35958	3801	4779	11181	34535
K01054	acylglycerol lipase [EC:3.1.1.23]	121	3	6	42	814	25	100	267	582	6
K07116	acyl-homoserine-lactone acylase [EC:3.5.1.97];	25	296	69365	1718	17654	51743	135	1421	2023	219
K01512	acylphosphatase [EC:3.6.1.7]	410	120741	31010	112477	50025	43157	11926	14425	20677	20797
K01557	acylpyruvate hydrolase [EC:3.7.1.5]	0	180	4	452	185	0	2	2	77	0
K13664	acyltransferase [EC:2.3.1.-]	0	2	2	1	1	222	1	0	0	0
K13663	acyltransferase [EC:2.3.1.-]	0	4	3	8	3	222	1	0	0	0
K01486	adenine deaminase [EC:3.5.4.2]	1600	154136	4635	327391	108335	1877	30269	13955	17737	1522
K00759	adenine phosphoribosyltransferase [EC:2.4.2.7]	84216	129976	80984	119889	92248	77085	74740	27932	46553	38724
K07316	adenine-specific DNA-methyltransferase [EC:2.1.1.72]	62	1100	3929	366	1227	1677	533	764	280	38
K07317	adenine-specific DNA-methyltransferase [EC:2.1.1.72]	0	0	28	640	123	10	17	0	1	0
K07318	adenine-specific DNA-methyltransferase [EC:2.1.1.72]	36	412	818	89	61	23	98	498	401	532
K01488	adenosine deaminase [EC:3.5.4.4]	83236	125447	75837	101429	60002	76862	14465	18349	43303	51867
K00856	adenosine kinase [EC:2.7.1.20]	57	79707	11908	15953	47527	3182	2587	2625	1864	553
K01509	adenosinetriphosphatase [EC:3.6.1.3]	0	4	1	0	1	1	0	1	0	0
K08260	adenosylcobinamide hydrolase [EC:3.5.1.90]	0	0	0	0	1	0	0	0	0	0
K02231	adenosylcobinamide kinase / adenosylcobinamide-phosphate guanylyltransferase [EC:2.7.1.156 2.7.7.62]	168286	189641	100114	198872	148332	69547	112979	38279	76467	73387
K02233	adenosylcobinamide-GDP ribazoletransferase [EC:2.7.8.26]	84165	54750	48558	103416	73154	35747	67680	19863	29658	36094
K02227	adenosylcobinamide-phosphate synthase [EC:6.3.1.10];adenosylcobinamide-phosphate synthase CobD [EC:6.3.1.10]	83782	133006	60265	104328	89748	37696	67353	20010	29847	36129
K02232	adenosylcobyric acid synthase [EC:6.3.5.10]	83521	57898	50162	104640	70465	36213	67328	20177	29346	36092
K01251	adenosylhomocysteinase [EC:3.3.1.1]	83939	140004	71842	117269	89823	39585	13733	20703	45992	4859
K00833	adenosylmethionine-8-amino-7-oxononanoate aminotransferase [EC:2.6.1.62]	83811	127105	63394	113237	87258	61943	47023	21285	52591	38472
K01768	adenylate cyclase [EC:4.6.1.1]	271	231282	11340	251585	98558	35261	57870	39989	70969	7392
K05851	adenylate cyclase, class 1 [EC:4.6.1.1]	82768	45	41560	185	3650	29987	3278	2569	9350	33905
K05873	adenylate cyclase, class 2 [EC:4.6.1.1]	276	35	454	1082	1666	317	835	992	1955	14794
K00939	adenylate kinase [EC:2.7.4.3]	84764	141910	86623	125877	98250	78486	113608	40437	73826	40155
K01756	adenylosuccinate lyase [EC:4.3.2.2]	84742	140902	86867	124192	97774	77963	75516	31254	60079	39593
K01939	adenylosuccinate synthase [EC:6.3.4.4]	84717	141463	93850	126314	98025	78395	75377	32767	64997	61263
K00860	adenylylsulfate kinase [EC:2.7.1.25]	83207	5111	72987	9758	10944	54086	9344	12051	25996	34544
K00394	adenylylsulfate reductase, subunit A [EC:1.8.99.2]	77	2	9	86	2291	1	696	942	1437	494
K00395	adenylylsulfate reductase, subunit B [EC:1.8.99.2]	71	1	9	86	2134	1	172	639	1243	462
K03148	adenylyltransferase [EC:2.7.7.-];adenylyltransferase ThiF [EC:2.7.7.-]	469	26	616	117	2955	189	3290	3304	9050	34825
K11996	adenylyltransferase and sulfurtransferase;adenylyltransferase and sulfurtransferase MOCS3/UBA4 [EC:2.7.7.- 2.8.1.-]	82856	1116	56120	15167	15574	59363	44022	16084	34551	36685
K12522	adhesin PapG	0	0	0	0	5	0	0	0	0	1
K13735	adhesin/invasin	0	0	424	257	109	120	9	47	122	25
K03274	ADP-L-glycero-D-manno-heptose 6-epimerase [EC:5.1.3.20]	295	81312	11701	22786	29055	1336	3882	4705	9777	34693
K08312	ADP-ribose diphosphatase [EC:3.6.1.-]	82780	314	41577	765	9061	30239	3203	5512	21100	34609
K01515	ADP-ribose pyrophosphatase [EC:3.6.1.13]	83710	118542	113263	110627	84860	104222	32493	18378	39266	69063
K13988	ADP-ribose pyrophosphatase [EC:3.6.1.13]	117	0	10	3	0	52	3	17	20	2
K05521	ADP-ribosylglycohydrolase [EC:3.2.-.-]	84041	41808	69304	87798	37026	61086	57850	12231	13714	15758
K00918	ADP-specific phosphofructokinase [EC:2.7.1.146];ADP-dependent phosphofructokinase/glucokinase [EC:2.7.1.146 2.7.1.147]	0	8	1	1430	201	40	20	48	22	3
K03894	aerobactin synthetase subunit alpha [EC:6.3.2.27]	2	6	1	2	1325	2	158	27	222	144
K03895	aerobactin synthetase subunit beta [EC:6.3.2.27]	2	6	1	2	1325	3	159	27	222	144
K11103	aerobic C4-dicarboxylate transport protein	200	102682	113938	18088	27590	99083	724	3000	1983	590
K03776	aerotaxis receptor	165664	80085	106256	15096	37790	70053	147129	28546	47553	28702
K01219	agarase [EC:3.2.1.81]	5	4	6397	1678	1403	3740	1488	1158	1928	6027
K01480	agmatinase [EC:3.5.3.11]	1241	133676	48755	264491	110084	50386	77095	33400	73625	41045
K10536	agmatine deiminase [EC:3.5.3.12]	82959	36697	93882	99370	35078	64227	5303	11669	24793	2731
K07800	AgrD protein	0	0	15	1	114	85	0	1	2	1
K11744	AI-2 transport protein TqsA	13	14	144	73	1980	71	33904	2942	2607	172
K10558	AI-2 transport system ATP-binding protein	10	14	179	71	3398	63	42	49	50	18
K10556	AI-2 transport system permease protein	34	31969	11594	79272	27616	1536	143	169	149	73
K10557	AI-2 transport system permease protein	10	14	179	71	3400	63	42	49	50	19
K10555	AI-2 transport system substrate-binding protein	22	31841	377	79039	27063	84	119	146	128	56
K12678	AIDA-I adhesin-like protein	0	0	0	0	15	0	0	0	0	1
K12554	alanine adding enzyme [EC:2.3.2.-]	13	17	2478	50	137	8824	4	2	3	1
K00259	alanine dehydrogenase [EC:1.4.1.1]	1073	55196	26414	104614	43412	41592	17389	21706	58193	40380
K03310	alanine or glycine:cation symporter, AGCS family	167679	13644	58857	24448	31040	98337	101078	44842	109329	117142
K01775	alanine racemase [EC:5.1.1.1]	84748	150172	100293	143464	109346	80029	76145	33281	66572	60626
K14286	alanine-glyoxylate aminotransferase 2-like [EC:2.6.1.-]	2	988	14	3378	996	0	2	31	6	1
K00827	alanine--glyoxylate transaminase / (R)-3-amino-2-methylpropionate-pyruvate transaminase [EC:2.6.1.44 2.6.1.40];alanine-glyoxylate transaminase / (R)-3-amino-2-methylpropionate-pyruvate transaminase [EC:2.6.1.44 2.6.1.40]	1	0	0	1	10	1	511	1160	4252	119
K00830	alanine-glyoxylate transaminase / serine-glyoxylate transaminase / serine-pyruvate transaminase [EC:2.6.1.44 2.6.1.45 2.6.1.51]	83093	294128	29040	303732	133048	54876	44642	44696	105891	98036
K14261	alanine-synthesizing transaminase [EC:2.6.1.-]	140	127886	53591	107664	38942	34051	36415	8353	6581	1041
K14260	alanine-synthesizing transaminase [EC:2.6.1.66 2.6.1.2]	165738	82927	113868	9886	89346	140651	8176	14160	37451	69181
K01872	alanyl-tRNA synthetase [EC:6.1.1.7]	84736	140866	83011	124408	97724	77105	75535	31352	60077	39509
K04022	alcohol dehydrogenase	0	3	137	35	540	53	40	184	41	5
K00114	alcohol dehydrogenase (acceptor) [EC:1.1.99.8];alcohol dehydrogenase (cytochrome c) [EC:1.1.2.8]	82784	1674	23546	15453	22552	22353	3053	2906	3782	452
K00002	alcohol dehydrogenase (NADP+) [EC:1.1.1.2]	7	9	2568	68	837	25851	462	605	407	23
K13954	alcohol dehydrogenase [EC:1.1.1.1]	514	90	39844	13462	8083	29182	2770	2106	7528	22335
K00001	alcohol dehydrogenase [EC:1.1.1.1]	249172	362651	67896	468985	173792	57215	41786	19675	30769	11813
K13953	alcohol dehydrogenase, propanol-preferring [EC:1.1.1.1]	82990	126901	43109	97774	56597	48186	3283	4972	4069	727
K01015	alcohol sulfotransferase [EC:2.8.2.2]	1	6014	4	342	89	0	5	5	2	2
K04021	aldehyde dehydrogenase	0	3	137	35	573	53	41	191	48	6
K07469	aldehyde dehydrogenase (FAD-independent) [EC:1.2.99.7]	94	1	6	1	10	1	58	426	303	444
K00129	aldehyde dehydrogenase (NAD(P)+) [EC:1.2.1.5]	0	3	33	2	126	211	2414	1902	1307	33
K00128	aldehyde dehydrogenase (NAD+) [EC:1.2.1.3]	250000	680067	302457	776320	386289	212422	107119	77945	158286	80174
K00138	aldehyde dehydrogenase [EC:1.2.1.-]	2	0	1	1	1343	3	1	2	2	2
K11947	aldehyde dehydrogenase [EC:1.2.1.-]	2	1	1	0	2	2	2	1	23	0
K08324	aldehyde dehydrogenase family protein [EC:1.2.1.-]	12	13	39365	109	2562	29089	12	13	13	15
K00011	aldehyde reductase [EC:1.1.1.21]	197	4	320	2628	1704	90	13	222	27	6
K03738	aldehyde:ferredoxin oxidoreductase [EC:1.2.7.5]	1447	210	1079	2444	4490	260	24015	5584	3735	1273
K01785	aldose 1-epimerase [EC:5.1.3.3]	1839	72692	65978	95275	51550	37485	15740	19836	34800	39275
K13028	aldoxime dehydratase [EC:4.99.1.5]	2	53	6370	650	269	3748	2414	1914	1310	35
K01502	aliphatic nitrilase [EC:3.5.5.7]	13	1031	4923	3047	1351	5178	2587	2302	1388	68
K01077	alkaline phosphatase [EC:3.1.3.1]	1272	161691	18823	173582	80964	3187	9734	12875	39856	49832
K09612	alkaline phosphatase isozyme conversion protein [EC:3.4.11.-]	2	4	152	37	2940	143	5	9	3	5
K00494	alkanal monooxygenase (FMN-linked) [EC:1.14.14.3]	156	162486	47773	182711	99832	19455	39399	8962	13641	7684
K00496	alkane 1-monooxygenase [EC:1.14.15.3]	165534	250	23926	4640	4690	16228	11169	11085	22479	2650
K04091	alkanesulfonate monooxygenase [EC:1.14.14.5]	82925	126114	200051	129329	106649	160491	4398	8918	8702	1518
K04756	alkyl hydroperoxide reductase subunit D	50	86426	11527	17650	8751	2434	240	363	310	63
K03387	alkyl hydroperoxide reductase subunit F [EC:1.6.4.-]	83333	87312	58832	5826	46399	43843	2028	4767	17844	22522
K03919	alkylated DNA repair protein [EC:1.14.11.-]	74	124543	54372	94991	61913	59776	6201	7069	12980	817
K00803	alkyldihydroxyacetonephosphate synthase [EC:2.5.1.26]	82760	212	20664	4841	18225	39151	2545	2231	2243	112
K00221	alkylmercury lyase [EC:4.99.1.2]	5	7	6400	92	274	3981	22	193	173	19
K02083	allantoate deiminase [EC:3.5.3.9]	47	2171	3495	4158	1937	1679	434	530	739	1554
K01477	allantoicase [EC:3.5.3.4]	37	43	39340	184	900	29789	33757	4153	3779	504
K10975	allantoin permease	10	423	2469	7	85	1059	0	0	0	2
K01466	allantoinase [EC:3.5.2.5]	70	32232	16503	83576	24839	28832	2559	2297	1467	173
K01457	allophanate hydrolase [EC:3.5.1.54]	82818	7271	43843	14107	23512	33809	37828	10665	16405	13816
K02092	allophycocyanin alpha subunit	2	0	6	16	945	14	90	24	12	6
K02093	allophycocyanin beta subunit	2	0	6	16	945	14	90	24	12	6
K02095	allophycocyanin-B	2	0	6	16	945	14	90	24	12	6
K00881	allose kinase [EC:2.7.1.55]	0	3	137	34	443	53	6	14	10	3
K09516	all-trans-retinol 13,14-reductase [EC:1.3.99.23]	362	4513	7344	43	880	3156	1945	2600	10401	1192
K01194	alpha,alpha-trehalase [EC:3.2.1.28]	22	599	3902	2112	10152	2704	1437	2283	6628	1886
K05342	alpha,alpha-trehalose phosphorylase [EC:2.4.1.64]	1	2	3163	6	217	437	5	3	5	4
K00697	alpha,alpha-trehalose-phosphate synthase (UDP-forming) [EC:2.4.1.15]	624	61046	21442	103133	59825	35303	4220	6069	3798	480
K13669	alpha-1,2-mannosyltransferase [EC:2.4.1.-]	3	6	5	140	19	4	6	9	48	1
K13671	alpha-1,2-mannosyltransferase [EC:2.4.1.-]	20	39	6210	261	881	29976	121	85	150	31
K12993	alpha-1,2-rhamnosyltransferase [EC:2.4.1.-]	6	5	19352	45	272	14745	86	44	89	9
K13657	alpha-1,3-mannosyltransferase [EC:2.4.1.252];alpha-1,3-mannosyltransferase [EC:2.4.1.-]	0	6	4	140	3	222	3	42	4	0
K12994	alpha-1,3-rhamnosyltransferase [EC:2.4.1.-]	7	130	19365	387	492	14837	7	5	9	6
K12988	alpha-1,3-rhamnosyltransferase [EC:2.4.1.-]	21	12	36538	131	1277	26835	55	170	172	15
K14339	alpha-1,6-mannosyltransferase [EC:2.4.1.-]	8	42	3352	184	347	2600	16	25	38	7
K14335	alpha-1,6-mannosyltransferase [EC:2.4.1.-]	28	4048	24551	1224	1657	18735	95	464	383	289
K14337	alpha-1,6-mannosyltransferase [EC:2.4.1.-]	6	11	3343	162	346	2467	15	16	34	5
K12987	alpha-1,6-rhamnosyltransferase [EC:2.4.1.-]	2	2	291	7	15	168	26	1160	783	166
K07405	alpha-amylase [EC:3.2.1.1]	558	8648	630	37	1274	3	246	562	447	477
K01176	alpha-amylase [EC:3.2.1.1]	82824	9435	7520	2871	8705	14327	11146	9698	28747	91899
K07406	alpha-galactosidase [EC:3.2.1.22]	429	17941	3514	20186	8428	1670	3637	5182	7521	13176
K07407	alpha-galactosidase [EC:3.2.1.22]	1097	21178	32681	9814	17467	9407	14247	11029	28343	73856
K01187	alpha-glucosidase [EC:3.2.1.20]	85376	135689	49700	206549	93759	43789	23130	27797	61612	39889
K10235	alpha-glucoside transport system ATP-binding protein	25	40371	246	83525	26965	19	4313	3251	5826	542
K10233	alpha-glucoside transport system permease protein	38	40543	11645	84131	27754	2292	6583	5339	6658	603
K10234	alpha-glucoside transport system permease protein	30	40534	11638	84098	26303	2295	6475	5055	6524	574
K10232	alpha-glucoside transport system substrate-binding protein	39	40544	11675	84135	27769	2570	9002	7272	7992	639
K01235	alpha-glucuronidase [EC:3.2.1.139]	414	12554	471	1821	2216	1266	163	560	98	43
K00105	alpha-glycerophosphate oxidase [EC:1.1.3.21]	17	72	3214	9	129	2508	65	147	383	5
K06912	alpha-ketoglutarate-dependent 2,4-dichlorophenoxyacetate dioxygenase [EC:1.14.11.-]	0	131	2	1400	54	10	3	3	2	1
K01206	alpha-L-fucosidase [EC:3.2.1.51]	3091	41999	28450	20057	29184	5324	7282	10556	30159	5225
K05989	alpha-L-rhamnosidase [EC:3.2.1.40]	74	17036	34567	3765	6690	4880	1218	2240	1933	142
K01191	alpha-mannosidase [EC:3.2.1.24]	155	4948	21793	7837	5242	6470	4992	5713	9995	34602
K01796	alpha-methylacyl-CoA racemase [EC:5.1.99.4]	82868	112571	55714	89827	47561	37331	6150	5668	4365	348
K01205	alpha-N-acetylglucosaminidase [EC:3.2.1.50]	34	3328	761	2282	3503	142	42	52	30	5
K01209	alpha-N-arabinofuranosidase [EC:3.2.1.55]	1374	48822	26231	20379	23303	8130	3318	5752	12025	3027
K02226	alpha-ribazole phosphatase [EC:3.1.3.73]	277	588	1173	111	2028	138	3275	2620	7673	33818
K09890	alternative ribosome-rescue factor;hypothetical protein	82760	40	41556	184	3494	29981	1542	2404	3683	13716
K01685	altronate hydrolase [EC:4.2.1.7]	500	25740	5630	20585	28933	5920	4648	6385	10739	1546
K01426	amidase [EC:3.5.1.4]	166006	260805	169932	250846	124418	118531	17327	25346	37665	5213
K14665	amidohydrolase [EC:3.5.1.-]	1	850	139	79	513	59	17	25	23	4
K00764	amidophosphoribosyltransferase [EC:2.4.2.14]	84739	145359	86941	125202	97404	79769	75412	34145	66678	40037
K03293	amino acid transporter, AAT family	83226	83995	260625	6041	37183	288481	757	5405	4156	1523
K14682	amino-acid N-acetyltransferase [EC:2.3.1.1]	82831	79492	53363	14728	45659	32037	3370	4403	9979	34413
K00619	amino-acid N-acetyltransferase [EC:2.3.1.1]	83065	80099	61250	10654	21316	55637	38264	9452	21054	24303
K01436	aminoacylase [EC:3.5.1.14];amidohydrolase [EC:3.5.1.-]	1088	15180	17815	18664	12766	46304	26721	14524	27117	2926
K01270	aminoacylhistidine dipeptidase [EC:3.4.13.3];dipeptidase D [EC:3.4.13.-]	1891	17886	6241	4495	16038	308	63392	16581	30360	37533
K12942	aminobenzoyl-glutamate transport protein	453	8989	3630	923	3819	28974	3822	7837	22155	34546
K12940	aminobenzoyl-glutamate utilization protein A	62	426	578	38	1910	263	105	119	163	84
K12941	aminobenzoyl-glutamate utilization protein B	57	80757	770	162548	53093	227	3702	4744	7786	14493
K00137	aminobutyraldehyde dehydrogenase [EC:1.2.1.19]	34	70865	25958	159581	50784	18399	199	538	376	188
K03392	aminocarboxymuconate-semialdehyde decarboxylase [EC:4.1.1.45]	31	939	13908	5712	3550	2745	1773	3588	17778	2140
K00897	aminoglycoside 3'-phosphotransferase [EC:2.7.1.95]	37	42259	16135	87802	26203	29045	1149	891	2319	11995
K05593	aminoglycoside 6-adenylyltransferase [EC:2.7.7.-]	47	627	3915	279	771	2785	20796	3038	1295	185
K00662	aminoglycoside N3'-acetyltransferase [EC:2.3.1.81]	276	14	97	5622	2997	233	94	202	132	61
K00663	aminoglycoside N6'-acetyltransferase [EC:2.3.1.82]	24	46826	17492	84845	25554	13541	111	155	108	48
K00605	aminomethyltransferase [EC:2.1.2.10]	166849	246797	124306	385382	175834	101857	45236	39625	83515	41713
K10217	aminomuconate-semialdehyde dehydrogenase [EC:1.2.1.32]	19	182	324	2178	518	2523	33464	2942	2621	274
K08326	aminopeptidase [EC:3.4.11.-]	0	0	0	1	22	0	0	0	0	1
K01269	aminopeptidase [EC:3.4.11.-]	1863	17953	10312	32807	22012	39223	48781	16969	30131	3189
K01268	aminopeptidase I [EC:3.4.11.22]	0	0	0	0	8	0	0	0	0	0
K01256	aminopeptidase N [EC:3.4.11.2]	83304	130862	85601	114836	89339	105953	15834	20468	53401	38449
K01264	aminopeptidase Y [EC:3.4.11.15]	23	139	12017	423	660	2029	197	70	370	161
K00839	aminotransferase [EC:2.6.1.-]	209	4812	15964	1335	3330	5436	36240	5906	4975	1761
K10907	aminotransferase [EC:2.6.1.-]	348	32738	613	78694	25067	410	1166	1817	1304	626
K08969	aminotransferase [EC:2.6.1.-]	6	428	59	17	270	7586	23	180	13	1
K00842	aminotransferase [EC:2.6.1.-]	1	5	1	60	81	4	0	1	0	0
K00841	aminotransferase [EC:2.6.1.-]	22	87	3272	24	546	10371	19	17	23	8
K03320	ammonium transporter, Amt family	1357	141206	77229	115483	99667	78811	43073	15860	19176	1845
K01241	AMP nucleosidase [EC:3.2.2.4]	83361	136529	55496	103404	60989	37052	6456	9731	14492	1041
K03806	AmpD protein	82837	79493	53382	14691	45675	32044	3359	5947	21837	34677
K03807	AmpE protein	82759	293	41137	689	8860	30085	176	3344	13489	515
K05341	amylosucrase [EC:2.4.1.4]	91	3646	14678	7136	2418	1958	2856	1469	2647	12631
K07791	anaerobic C4-dicarboxylate transporter DcuA	58	24	4028	129	2950	987	4555	4705	13621	34019
K07792	anaerobic C4-dicarboxylate transporter DcuB	22	4330	659	801	2489	502	4437	4462	13509	34008
K03302	anaerobic C4-dicarboxylate transporter, Dcu family	2	2	3178	6	329	458	5	3	4	4
K00397	anaerobic dimethyl sulfoxide reductase [EC:1.8.99.-]	5	136	5	848	27	5	564	206	1141	14361
K07306	anaerobic dimethyl sulfoxide reductase subunit A [EC:1.8.5.3];anaerobic dimethyl sulfoxide reductase subunit A [EC:1.8.99.-]	15	12	1130	50	3265	304	2338	3023	9733	14655
K07307	anaerobic dimethyl sulfoxide reductase subunit B (DMSO reductase iron- sulfur subunit)	77	9	843	76	1370	228	1509	2973	8467	514
K07308	anaerobic dimethyl sulfoxide reductase subunit C (DMSO reductase anchor subunit)	39	33755	969	84153	31739	223	7925	9327	19825	15329
K04034	anaerobic magnesium-protoporphyrin IX monomethyl ester cyclase [EC:4.-.-.-]	128	1526	171	9943	3080	317	496	1788	1064	94
K12264	anaerobic nitric oxide reductase flavorubredoxin	11	12	3086	49	2036	2195	1446	985	4398	19697
K12266	anaerobic nitric oxide reductase transcription regulator	82777	202	47976	2308	4132	35308	5058	4745	13996	55846
K04068	anaerobic ribonucleoside-triphosphate reductase activating protein [EC:1.97.1.4]	689	4720	22205	1728	7918	22171	24604	6069	9910	34152
K00385	anaerobic sulfite reductase subunit C [EC:1.8.1.-]	126	152	140	54	1214	7	613	338	1005	12622
K09001	anhydro-N-acetylmuramic acid kinase [EC:2.7.1.-];anhydro-N-acetylmuramic acid kinase [EC:2.7.1.170]	83085	128268	56261	113489	87985	33314	13907	19106	43401	37224
K06350	antagonist of KipI	4	424	40	264	116	106	68	1898	11432	288
K06372	antagonist of SinR	0	0	0	0	9	0	0	0	0	0
K05599	anthranilate 1,2-dioxygenase (deaminating, decarboxylating) large subunit [EC:1.14.12.1]	10	10	23581	77	472	17161	14	9	13	13
K05600	anthranilate 1,2-dioxygenase (deaminating, decarboxylating) small subunit [EC:1.14.12.1]	10	10	23581	77	472	17161	14	9	13	13
K11311	anthranilate dioxygenase reductase	10	10	23581	77	472	17161	14	9	13	13
K00766	anthranilate phosphoribosyltransferase [EC:2.4.2.18]	84036	138582	79223	124098	93121	74751	52693	27965	58579	39196
K13503	anthranilate synthase [EC:4.1.3.27]	15	43785	225	86891	25532	12	100	210	114	44
K01657	anthranilate synthase component I [EC:4.1.3.27]	84022	95304	82711	37447	75989	77051	52598	28008	58646	39255
K01658	anthranilate synthase component II [EC:4.1.3.27]	84000	93861	64551	36023	65043	47675	52284	27717	58756	39360
K13497	anthranilate synthase/phosphoribosyltransferase [EC:4.1.3.27 2.4.2.18]	16	8	702	101	3747	231	167	809	546	551
K09461	anthraniloyl-CoA monooxygenase [EC:1.14.13.40]	30	35496	12980	94916	48475	2736	6447	5015	8124	300
K11029	anthrax edema toxin adenylate cyclase [EC:4.6.1.1]	0	0	0	31	12	0	0	0	0	0
K09687	antibiotic transport system ATP-binding protein	254769	186969	160966	258825	214245	231116	146854	81553	131678	78892
K09686	antibiotic transport system permease protein	253396	264572	185911	179196	190122	190561	222972	86095	151086	144884
K12687	antigen 43	0	0	0	0	3	0	0	0	0	0
K07741	anti-repressor protein	37	2191	2517	345	1222	1153	122	42	71	22
K04757	anti-sigma B factor [EC:2.7.11.1]	934	4900	408	1337	6088	228	26790	11968	14708	885
K04749	anti-sigma B factor antagonist	881	5375	831	3735	5807	1869	29609	13308	16742	976
K06195	ApaG protein	82860	128499	55780	116849	84073	35610	5995	10977	29004	36534
K02634	apocytochrome f	2	0	6	16	945	14	90	24	12	6
K03820	apolipoprotein N-acyltransferase [EC:2.3.1.-]	83620	131102	76099	120885	84486	41204	52985	30183	56634	37641
K05368	aquacobalamin reductase / NAD(P)H-flavin reductase [EC:1.16.1.3 1.5.1.29]	29	32	1147	103	4202	373	8925	9416	28338	67807
K06188	aquaporin Z	109	50054	45823	104604	51743	34354	39362	9247	20698	24594
K06113	arabinan endo-1,5-alpha-L-arabinosidase [EC:3.2.1.99]	408	16207	3438	472	2447	1541	275	600	396	34
K13686	arabinofuranosyltransferase [EC:2.4.2.-]	4	9	141	154	140	1784	11	17	30	2
K13687	arabinofuranosyltrasnferase [EC:2.4.2.-];arabinofuranosyltransferase [EC:2.4.2.-]	5	134	61	150	171	2325	84	1191	354	10
K01224	arabinogalactan endo-1,4-beta-galactosidase [EC:3.2.1.89]	72	8269	12210	6386	3380	2440	156	467	449	41
K02101	arabinose operon protein AraL	3	0	23	1	20	14	0	0	0	0
K02102	arabinose operon protein AraM	0	0	0	0	14	0	4	10	10	0
K06041	arabinose-5-phosphate isomerase [EC:5.3.1.13]	83830	108329	61555	32567	62796	35768	47360	24246	55815	40543
K11385	arabinosyltransferase A [EC:2.4.2.-]	2	4	4	140	19	7	7	12	28	1
K11386	arabinosyltransferase B [EC:2.4.2.-]	3	10	6	141	32	9	9	14	28	1
K11387	arabinosyltransferase C [EC:2.4.2.-]	5	15	142	155	143	1786	14	19	30	2
K07506	AraC family transcriptional regulator	82803	71126	60941	103250	35365	45425	1737	3553	4288	599
K05372	AraC family transcriptional regulator	0	4	137	46	526	53	1	4	4	3
K13652	AraC family transcriptional regulator	550	136327	39571	88359	29355	21925	73618	13665	35532	41713
K13653	AraC family transcriptional regulator	1028	41418	14178	84400	33337	10053	23192	4943	10407	3709
K11920	AraC family transcriptional regulator	0	0	0	0	10	0	0	0	0	0
K02508	AraC family transcriptional regulator, 4-hydroxyphenylacetate 3-monooxygenase operon regulatory protein	12	13	27083	95	2348	19467	508	1435	1561	5745
K02099	AraC family transcriptional regulator, arabinose operon regulatory protein	281	209	1067	51	3985	590	524	638	586	1588
K03490	AraC family transcriptional regulator, cel operon repressor	409	4337	591	69	2860	181	524	266	421	43
K06599	AraC family transcriptional regulator, chemosensory pili system protein ChpD	1	2	6464	15	312	3730	2	3	2	1
K04033	AraC family transcriptional regulator, ethanolamine operon transcriptional activator	22	1268	39645	6669	17898	29111	601	3338	14878	2110
K02855	AraC family transcriptional regulator, L-rhamnose operon regulatory protein RhaS	196	9	300	72	3916	122	987	542	1438	7219
K02854	AraC family transcriptional regulator, L-rhamnose operon transcriptional activator RhaR	196	5	141	38	3404	62	91	94	57	18
K13632	AraC family transcriptional regulator, multiple antibiotic resistance protein MarA	2	6	275	69	2289	109	1	7	2	6
K14063	AraC family transcriptional regulator, positive regulator of tynA and feaB	2	3	138	34	1821	56	0	4	2	4
K13529	AraC family transcriptional regulator, regulatory protein of adaptative response / DNA-3-methyladenine glycosylase II [EC:3.2.2.21]	41	993	15375	5152	23373	29826	5633	6222	20952	34158
K10778	AraC family transcriptional regulator, regulatory protein of adaptative response / methylated-DNA-[protein]-cysteine methyltransferase [EC:2.1.1.63]	82905	178085	88654	194017	71080	60886	40867	12450	20303	1514
K13530	AraC family transcriptional regulator, regulatory protein of adaptative response / methylphosphotriester-DNA alkyltransferase methyltransferase [EC:2.1.1.-]	13	443	2514	11	104	1083	9	6	4	2
K10923	AraC family transcriptional regulator, TCP pilus virulence regulatory protein	2	2	2	2	11	3	1023	705	2198	11922
K13633	AraC family transcriptional regulator, transcriptional activator FtrA	19	4709	33254	4170	3678	25914	244	109	2412	163
K03755	AraC family transcriptional regulator, transcriptional activator of adiA	0	0	0	1	22	0	0	0	0	1
K12243	AraC family transcriptional regulator, transcriptional activator of the genes for pyochelin and ferripyochelin receptors	4	292	13793	778	250	10714	5	3	5	4
K13631	AraC family transcriptional regulator, transcriptional activator of the superoxide response regulon	2	3	138	35	1976	56	1	5	2	4
K00460	arachidonate 15-lipoxygenase [EC:1.13.11.33]	0	0	0	0	0	0	40	56	9	2
K00461	arachidonate 5-lipoxygenase [EC:1.13.11.34]	0	0	0	0	8	0	0	0	0	0
K10725	archaeal cell division control protein 6	1	0	1	2	18	236	24	14	2	0
K07463	archaea-specific RecJ-like exonuclease	1	0	1	2	18	236	24	14	2	0
K01476	arginase [EC:3.5.3.1]	235	164532	30427	193379	87392	7933	25242	9952	14097	6607
K02626	arginine decarboxylase [EC:4.1.1.19]	106	1	263	1072	23	0	631	2592	882	44
K01585	arginine decarboxylase [EC:4.1.1.19]	83908	9704	47037	10180	18793	30317	43761	17963	47500	38605
K01584	arginine decarboxylase [EC:4.1.1.19]	62	85671	46996	14928	26071	28381	595	1900	1625	1905
K01583	arginine decarboxylase [EC:4.1.1.19]	147	220	184	21	1984	2	103	496	76	22
K01478	arginine deiminase [EC:3.5.3.6]	83189	40403	48732	82117	30315	34722	26656	7442	10442	34234
K00934	arginine kinase [EC:2.7.3.3]	1	1	2	46	13	2	1857	1973	1471	8
K00673	arginine N-succinyltransferase [EC:2.3.1.109]	165580	3890	140248	1985	9200	107332	3616	11015	34795	35599
K10000	arginine transport system ATP-binding protein [EC:3.6.3.-]	12	14	571	48	2052	186	2820	1972	7169	33680
K09998	arginine transport system permease protein	12	14	571	47	2051	186	2768	1971	5093	33679
K09999	arginine transport system permease protein	12	14	571	48	2052	186	2821	1972	7173	33680
K09996	arginine transport system substrate-binding protein	2	3	138	35	1907	56	2	5	6	4
K09997	arginine transport system substrate-binding protein	12	14	571	48	2052	186	2820	1972	7173	33680
K06714	arginine utilization regulatory protein	277	1064	254	132	1820	187	20870	3389	1271	176
K02205	arginine/ornithine permease	4	848	13776	29	194	10712	4	3	5	4
K10025	arginine/ornithine transport system ATP-binding protein [EC:3.6.3.-]	82754	43	40994	154	1569	29809	30	21	73	36
K10023	arginine/ornithine transport system permease protein	82764	52	41018	162	1623	29839	63	127	346	297
K10024	arginine/ornithine transport system permease protein	82754	43	41012	154	1569	29816	30	21	75	36
K10022	arginine/ornithine transport system substrate-binding protein	82769	193	74663	276	2044	55643	68	1195	899	213
K03759	arginine:agmatine antiporter	3	608	1287	309	345	537	366	293	471	1510
K03758	arginine:ornithine antiporter	82885	78042	76267	161564	54988	58158	2207	4099	9232	2050
K12252	arginine:pyruvate transaminase [EC:2.6.1.84]	42	39824	46844	83068	25805	36046	3340	6310	12326	1096
K00685	arginine-tRNA-protein transferase [EC:2.3.2.8]	82993	128459	56116	110608	79065	35433	45485	18568	39878	35728
K14681	argininosuccinate lyase / amino-acid N-acetyltransferase [EC:4.3.2.1 2.3.1.1]	18	19	14	21	93	16	5350	5269	17287	43821
K01755	argininosuccinate lyase [EC:4.3.2.1]	84699	179567	94669	206458	121807	87781	71994	30083	55333	23355
K01940	argininosuccinate synthase [EC:6.3.4.5]	84426	140805	79953	123321	95989	76357	52648	26949	58392	39280
K01887	arginyl-tRNA synthetase [EC:6.1.1.19]	84739	140881	80195	124187	98517	75793	75684	31838	60403	39517
K14670	aromatase	1	2	86	5	6	701	13	31	24	6
K05554	aromatase [EC:4.2.1.-];cyclase/dehydratase [EC:4.2.1.-]	0	127	71	15	9	495	1	1	1	1
K11734	aromatic amino acid transport protein AroP	4	202	140	38	1880	57	2	7	4	5
K00832	aromatic-amino-acid transaminase [EC:2.6.1.57]	82985	123060	89160	99107	62175	61189	9314	10287	22010	36564
K01593	aromatic-L-amino-acid decarboxylase [EC:4.1.1.28]	4	1101	292	8971	1777	559	3068	5902	11349	948
K00537	arsenate reductase [EC:1.20.4.1]	167157	182190	104697	202876	109868	94517	73950	35965	70869	39863
K03741	arsenate reductase [EC:1.20.4.1]	1886	139907	58306	121419	71107	37676	76093	31122	52803	18079
K03893	arsenical pump membrane protein	95	2285	65745	18145	11068	49332	35866	6542	5221	454
K11811	arsenical resistance protein ArsH	82850	125911	46537	97397	43277	31314	1602	3529	4187	756
K08356	arsenite oxidase large subunit [EC:1.20.98.1]	0	1	689	331	31	807	4	43	38	14
K08355	arsenite oxidase small subunit [EC:1.20.98.1]	0	1	689	331	31	807	4	43	38	14
K03325	arsenite transporter, ACR3 family	84033	51929	12615	97638	63876	34561	34911	23430	51339	26554
K01551	arsenite-transporting ATPase [EC:3.6.3.16]	485	626	6126	2283	4796	4561	23718	6055	4361	441
K07721	ArsR family transcriptional regulator	0	0	0	0	0	5	0	0	0	0
K03892	ArsR family transcriptional regulator	252222	165337	173299	147649	110264	118396	186201	59675	84404	80032
K01014	aryl sulfotransferase [EC:2.8.2.1]	0	3	34	2407	528	0	59	106	54	113
K05882	aryl-alcohol dehydrogenase (NADP+) [EC:1.1.1.91]	32	1423	26975	2949	1772	30791	347	316	511	79
K00055	aryl-alcohol dehydrogenase [EC:1.1.1.90]	33	2888	12488	4177	2639	6803	2522	2646	1424	79
K00622	arylamine N-acetyltransferase [EC:2.3.1.5]	8	1068	311	3985	1419	2325	16	76	36	6
K01045	arylesterase / paraoxonase [EC:3.1.1.2 3.1.8.1];arylesterase [EC:3.1.1.2]	0	6	34	2418	548	0	614	1258	396	44
K01432	arylformamidase [EC:3.5.1.9]	4	3	2	2	7	10	16	55	58	131
K01130	arylsulfatase [EC:3.1.6.1]	456	183601	54766	266704	90670	36213	13786	18493	35876	53118
K01134	arylsulfatase A [EC:3.1.6.8]	4	148	30	80	140	10	402	242	98	36
K01135	arylsulfatase B [EC:3.1.6.12]	0	0	0	16	6	0	0	0	0	0
K01023	arylsulfate sulfotransferase [EC:2.8.2.22]	1	19	1	3	180	1	632	1224	1051	116
K07289	AsmA protein	83026	47821	42229	109934	54394	30075	6884	11803	33299	36244
K01953	asparagine synthase (glutamine-hydrolysing) [EC:6.3.5.4]	85041	182000	65494	217024	118363	47737	83478	29572	58636	41002
K01893	asparaginyl-tRNA synthetase [EC:6.1.1.22]	1657	9905	9323	11073	21037	11529	30029	14668	39073	37815
K01579	aspartate 1-decarboxylase [EC:4.1.1.11]	1184	102120	43407	15294	54500	48853	43035	14668	24526	3651
K09758	aspartate 4-decarboxylase [EC:4.1.1.12]	19	197	2529	2949	737	1081	2435	2189	2619	14311
K00811	aspartate aminotransferase [EC:2.6.1.1]	1203	9063	4800	5537	10778	58	24197	7673	16859	3043
K00812	aspartate aminotransferase [EC:2.6.1.1]	84371	148483	60279	280324	132284	26143	67999	28393	50194	5453
K00813	aspartate aminotransferase [EC:2.6.1.1]	15	18	574	125	2149	188	3163	4334	20253	34140
K11358	aspartate aminotransferase [EC:2.6.1.1]	339	132	198	105	2245	75	812	1071	1259	571
K01744	aspartate ammonia-lyase [EC:4.3.1.1]	83875	13763	57952	6714	31286	34141	39723	14525	31160	35344
K00476	aspartate beta-hydroxylase [EC:1.14.11.16]	2	988	14	3378	1006	0	2	31	6	1
K00608	aspartate carbamoyltransferase [EC:2.1.3.2]	191	0	1	0	1490	1	19	155	35	21
K00609	aspartate carbamoyltransferase catalytic subunit [EC:2.1.3.2]	84506	141901	82755	121415	95468	77209	73726	33029	71675	39889
K00610	aspartate carbamoyltransferase regulatory subunit	815	8821	1554	161	4255	198	23637	4936	8806	21613
K06989	aspartate dehydrogenase [EC:1.4.1.21]	28	37642	272	88587	32091	43	2981	2010	1742	616
K00928	aspartate kinase [EC:2.7.2.4]	168073	150724	84322	127928	98326	77803	85150	40280	89860	103437
K01779	aspartate racemase [EC:5.1.1.13]	83175	156145	48278	178985	101023	29682	25796	11227	16181	18413
K01914	aspartate--ammonia ligase [EC:6.3.1.1]	892	8921	1589	1219	6925	8880	20993	5083	13536	539
K00133	aspartate-semialdehyde dehydrogenase [EC:1.2.1.11]	167639	144588	120915	128923	102412	106178	76589	33513	68753	73541
K01437	aspartoacylase [EC:3.5.1.15]	8	8	8	14	295	8	1554	2747	14339	16539
K01267	aspartyl aminopeptidase [EC:3.4.11.21]	82852	58	42037	550	17281	30658	327	2472	2123	999
K06985	aspartyl protease family protein	82832	93429	39633	183907	106350	31699	6656	9718	16573	1365
K01876	aspartyl-tRNA synthetase [EC:6.1.1.12]	84738	140870	83040	124159	98775	77459	75539	31340	60100	39511
K02433	aspartyl-tRNA(Asn)/glutamyl-tRNA (Gln) amidotransferase subunit A [EC:6.3.5.6 6.3.5.7]	167866	706034	296990	711175	440154	239004	136775	70826	107587	12416
K02434	aspartyl-tRNA(Asn)/glutamyl-tRNA (Gln) amidotransferase subunit B [EC:6.3.5.6 6.3.5.7]	167476	262899	152448	241682	164793	149445	115411	44622	63977	6120
K02435	aspartyl-tRNA(Asn)/glutamyl-tRNA (Gln) amidotransferase subunit C [EC:6.3.5.6 6.3.5.7]	167466	263215	152459	241607	161927	149563	115088	42789	62955	6090
K08076	astacin [EC:3.4.24.21]	0	0	0	0	0	0	6	4	45	14
K00988	ATP adenylyltransferase [EC:2.7.7.53]	0	1	2	645	317	2	124	79	59	55
K01648	ATP citrate (pro-S)-lyase [EC:2.3.3.8]	3	3	1692	3	58	4	3914	4159	3209	27
K00765	ATP phosphoribosyltransferase [EC:2.4.2.17]	84317	138380	78998	122947	95548	74437	52736	28248	58874	39301
K02502	ATP phosphoribosyltransferase regulatory subunit	83264	124820	55593	115352	75987	42838	7324	9824	15683	1409
K03224	ATP synthase in type III secretion protein SctN [EC:3.6.3.14]	17	7497	5943	6715	2568	4362	1053	655	1631	12974
K02116	ATP synthase protein I	83138	130220	38851	110668	76617	23369	10405	15713	36777	37444
K03301	ATP:ADP antiporter, AAA family	1	0	0	0	0	0	7	28	2	2
K06147	ATP-binding cassette, subfamily B, bacterial	258286	780810	368133	942930	523506	309974	389207	129601	213381	146030
K11004	ATP-binding cassette, subfamily B, bacterial HlyB/CyaB	36	258	3612	1060	15244	2728	287	276	144	396
K14698	ATP-binding cassette, subfamily B, bacterial IrtA [EC:3.6.3.-]	0	0	4	134	16	0	2	6	2	1
K14699	ATP-binding cassette, subfamily B, bacterial IrtB [EC:3.6.3.-]	0	0	4	134	16	0	2	6	2	1
K11085	ATP-binding cassette, subfamily B, bacterial MsbA [EC:3.6.3.-]	83886	93886	59557	38663	66962	32790	47115	22722	57839	41827
K12530	ATP-binding cassette, subfamily B, bacterial RtxB	9	7	17649	35	248	13550	1897	1361	3347	17759
K12531	ATP-binding cassette, subfamily B, bacterial RtxE	9	7	17649	35	227	13550	1498	934	2951	17495
K06148	ATP-binding cassette, subfamily C, bacterial	166873	238816	149542	299094	151027	176385	129437	52293	97642	126696
K12536	ATP-binding cassette, subfamily C, bacterial HasD	17	476	37342	2132	1750	27206	655	520	3309	12666
K12541	ATP-binding cassette, subfamily C, bacterial LapB	15	9	33628	108	510	25819	11	8	42	11
K12539	ATP-binding cassette, subfamily C, bacterial PrsD	3	6085	236	524	209	81	10	155	13	5
K12533	ATP-binding cassette, subfamily C, bacterial RsaD	0	94	1	22	10	0	0	0	0	0
K12292	ATP-binding cassette, subfamily C, bacterial, competence factor transporting protein [EC:3.4.22.-]	0	0	1	0	54	68	0	0	0	0
K06158	ATP-binding cassette, sub-family F, member 3	85370	157363	65213	133745	101650	46315	71168	29163	63344	26721
K03593	ATP-binding protein involved in chromosome partitioning	83882	141521	79013	124139	92057	66910	56016	30552	65011	39382
K06891	ATP-dependent Clp protease adaptor protein ClpS	83463	171368	73080	206741	116404	62544	52094	27475	58449	39230
K03694	ATP-dependent Clp protease ATP-binding subunit ClpA	83168	130485	56754	111003	81861	35613	45757	19364	40778	36201
K03695	ATP-dependent Clp protease ATP-binding subunit ClpB	84728	140443	83030	124646	97935	68834	75025	30983	60030	39483
K03696	ATP-dependent Clp protease ATP-binding subunit ClpC	84120	14023	39629	13876	16003	44491	28009	12632	19701	3350
K03697	ATP-dependent Clp protease ATP-binding subunit ClpE	167	629	3414	35	1345	10248	41	221	35	11
K04086	ATP-dependent Clp protease ATP-binding subunit ClpL	3	5	6	6	178	8815	6	3	5	5
K03544	ATP-dependent Clp protease ATP-binding subunit ClpX	84642	140878	82610	124183	96912	77029	107074	34278	62669	39690
K01358	ATP-dependent Clp protease, protease subunit [EC:3.4.21.92]	85000	187577	101635	215419	132476	111072	78922	36747	68190	41520
K03722	ATP-dependent DNA helicase DinG [EC:3.6.4.12];ATP-dependent DNA helicase DinG [EC:3.6.1.-]	83441	85336	66603	24500	79960	76798	8826	11883	37039	68718
K03655	ATP-dependent DNA helicase RecG [EC:3.6.1.-];ATP-dependent DNA helicase RecG [EC:3.6.4.12]	168726	151389	88509	136157	112717	88502	62572	35050	70297	40623
K03654	ATP-dependent DNA helicase RecQ [EC:3.6.1.-];ATP-dependent DNA helicase RecQ [EC:3.6.4.12]	168543	151722	140342	129866	124370	122118	80278	39090	86976	65545
K03656	ATP-dependent DNA helicase Rep [EC:3.6.1.-];ATP-dependent DNA helicase Rep [EC:3.6.4.12]	82845	111571	53567	92687	74445	32280	3430	6152	22026	34718
K03580	ATP-dependent helicase HepA [EC:3.6.4.-];ATP-dependent helicase HepA [EC:3.6.1.-]	82790	69	41583	355	3800	30022	3294	4033	10890	34342
K03578	ATP-dependent helicase HrpA [EC:3.6.1.-];ATP-dependent helicase HrpA [EC:3.6.4.13]	82869	79939	70685	15802	52405	63057	3505	6129	22685	34726
K03579	ATP-dependent helicase HrpB [EC:3.6.4.13];ATP-dependent helicase HrpB [EC:3.6.1.-]	83028	49396	51578	95241	39037	61364	11839	15951	37746	35920
K03724	ATP-dependent helicase Lhr and Lhr-like helicase [EC:3.6.1.-];ATP-dependent helicase Lhr and Lhr-like helicase [EC:3.6.4.-]	82851	49668	75903	102331	44377	78308	10681	11995	21991	2884
K03667	ATP-dependent HslUV protease ATP-binding subunit HslU	83482	131043	60076	113604	68771	37211	46318	20962	41350	36239
K01419	ATP-dependent HslUV protease, peptidase subunit HslV [EC:3.4.25.2];ATP-dependent HslUV protease, peptidase subunit HslV [EC:3.4.25.-]	83485	131043	60079	113611	68776	37211	46319	20962	41350	36239
K01338	ATP-dependent Lon protease [EC:3.4.21.53]	167973	140579	105090	136167	118738	67779	75845	36588	67017	52427
K05592	ATP-dependent RNA helicase DeaD [EC:3.6.4.13];ATP-dependent RNA helicase DeaD	84631	55596	67766	98034	53362	73650	74209	31116	60316	39347
K03727	ATP-dependent RNA helicase HelY [EC:3.6.1.-];ATP-dependent RNA helicase HelY [EC:3.6.4.-]	32	753	17357	2594	2563	30813	2565	2057	1487	87
K03732	ATP-dependent RNA helicase RhlB [EC:3.6.1.-];ATP-dependent RNA helicase RhlB [EC:3.6.4.13]	83107	325	41592	845	10651	30250	3388	6107	22419	34658
K11927	ATP-dependent RNA helicase RhlE [EC:3.6.1.-];ATP-dependent RNA helicase RhlE [EC:3.6.4.13]	84367	140144	65661	132654	101846	35727	96498	40222	96269	76107
K05590	ATP-dependent RNA helicase SrmB [EC:2.7.7.-]	14	15	571	51	2072	187	3052	2254	8480	33855
K05591	ATP-independent RNA helicase DbpA [EC:3.6.4.13];ATP-independent RNA helicase DbpA	82874	79933	54009	14066	33717	32265	38978	10723	25682	34834
K05394	atrazine chlorohydrolase [EC:3.8.1.8]	13	31829	326	78470	40551	70	106	191	588	55
K01926	AT-rich DNA-binding protein	1693	5326	7962	7687	9610	13068	24386	6668	3798	863
K01401	aureolysin [EC:3.4.24.29]	0	0	15	0	110	83	0	1	2	1
K12548	autoaggregation protein RapA/B/C	0	9	2	5	0	0	0	2	0	0
K11216	autoinducer 2 (AI-2) kinase [EC:2.7.1.-]	11	15	1025	327	3431	65	1998	2125	1636	33
K10910	autoinducer 2-binding periplasmic protein LuxP	11	12	10	11	53	12	3135	3891	19045	34071
K11530	autoinducer 2-degrading protein	11	14	410	234	3383	145	47	201	59	23
K06866	autonomous glycyl radical cofactor	13	15	571	48	2058	186	3034	2147	8036	33836
K12680	autotransported protein MisL	0	0	0	1	28	0	0	0	0	0
K12688	autotransporter serine protease [EC:3.4.21.-]	0	0	0	31	12	0	0	0	0	0
K14374	avermectin B 5-O-methyltransferase [EC:2.1.1.-]	0	0	78	2	2	645	0	1	1	1
K13455	avirulence protein	1	1	2978	6	51	2146	1	0	0	1
K03206	azobenzene reductase [EC:1.7.1.6]	0	0	1	4	26	0	0	1	0	0
K01400	bacillolysin [EC:3.4.24.28]	1	438	116	27	90	725	10	9	4	2
K13276	bacillopeptidase F [EC:3.4.21.-]	0	0	14	2	34	87	7	7	2	1
K11631	bacitracin transport system ATP-binding protein	3	4	31	3	191	177	15	45	6	2
K11632	bacitracin transport system permease protein	3	4	31	3	191	177	15	45	6	2
K05994	bacterial leucyl aminopeptidase [EC:3.4.11.10]	8	8	117	9	164	9	2125	1606	4064	26701
K03594	bacterioferritin	165957	210390	138229	130393	131530	90826	47232	22964	39631	34735
K02192	bacterioferritin-associated ferredoxin	82839	83851	51173	16712	36470	30275	2577	5779	20529	20168
K11739	bacteriophage N4 adsorption protein A	6	2	2485	51	82	1768	3	3	36	3
K11740	bacteriophage N4 adsorption protein B	15	217	6345	3598	1225	7012	56	281	90	16
K04641	bacteriorhodopsin	0	0	0	0	22	0	1	0	15	1
K03294	basic amino acid/polyamine antiporter, APA family	1265	29434	25249	24225	55646	23559	29700	15029	19557	34409
K07335	basic membrane protein A and related proteins	2230	80234	21871	170469	68375	32438	30148	13788	17373	1364
K03796	Bax protein	65	26	1414	128	2195	201	36497	5449	11600	32607
K00141	benzaldehyde dehydrogenase (NAD) [EC:1.2.1.28]	21	1137	21051	184	1565	15655	26	20	92	20
K03268	benzene 1,2-dioxygenase [EC:1.14.12.3]	2	1	18	469	4	183	2	2	2	0
K05549	benzoate 1,2-dioxygenase alpha subunit [EC:1.14.12.10]	34	117	43281	3657	2617	37561	461	1917	1525	1709
K05550	benzoate 1,2-dioxygenase beta subunit [EC:1.14.12.10]	22	1122	29948	3045	1805	24863	452	1718	1483	1701
K05784	benzoate 1,2-dioxygenase electron transfer component	24	30	42144	146	1274	32614	418	1486	1484	1693
K07824	benzoate 4-monooxygenase [EC:1.14.13.12]	0	1	0	1	1	9	8	3	10	0
K05782	benzoate membrane transport protein	82885	125325	123168	101825	60665	79143	4694	8468	26137	15086
K04110	benzoate-CoA ligase [EC:6.2.1.25]	3	1138	2183	5455	16973	1662	2500	1967	1446	63
K04113	benzoyl-CoA reductase subunit [EC:1.3.99.15];benzoyl-CoA reductase subunit [EC:1.3.7.8]	0	1	91	3554	83	0	34	10	26	1
K04112	benzoyl-CoA reductase subunit [EC:1.3.99.15];benzoyl-CoA reductase subunit [EC:1.3.7.8]	0	1	91	3554	90	0	34	10	26	1
K04115	benzoyl-CoA reductase subunit [EC:1.3.99.15];benzoyl-CoA reductase subunit [EC:1.3.7.8]	0	1	91	3554	83	0	34	10	26	1
K04114	benzoyl-CoA reductase subunit [EC:1.3.99.15];benzoyl-CoA reductase subunit [EC:1.3.7.8]	0	1	91	3554	83	0	34	10	26	1
K01576	benzoylformate decarboxylase [EC:4.1.1.7]	9	447	20198	3305	506	15633	42	1177	791	174
K07543	benzylsuccinate CoA-transferase BbsE subunit [EC:2.8.3.15]	0	1	0	0	28	2	1	3	2	0
K07544	benzylsuccinate CoA-transferase BbsF subunit [EC:2.8.3.15]	0	0	0	0	0	0	9	8	26	0
K07540	benzylsuccinate synthase [EC:4.1.99.11]	6	0	0	0	29	0	460	136	64	24
K13658	beta-1,2-mannosyltransferase [EC:2.4.1.-];beta-1,4-mannosyltransferase&#160: [EC:2.4.1.251]	0	12	3	1	1	246	1	0	0	0
K13660	beta-1,4-glucosyltransferase [EC:2.4.1.-]	0	4	3	8	3	222	1	0	0	0
K00737	beta-1,4-mannosyl-glycoprotein beta-1,4-N-acetylglucosaminyltransferase [EC:2.4.1.144]	2	6	1	316	1401	2	10	72	19	6
K00822	beta-alanine--pyruvate transaminase [EC:2.6.1.18]	82834	137210	53046	108846	60470	32214	1399	2646	3794	2372
K01305	beta-aspartyl-dipeptidase (metallo-type) [EC:3.4.19.-]	48	106	755	16	2543	439	1451	2491	6251	318
K13051	beta-aspartyl-peptidase (threonine type) [EC:3.4.19.5]	76	92717	14912	26415	37169	2597	5312	8785	27617	36346
K02294	beta-carotene hydroxylase [EC:1.14.13.-]	24	584	1059	3814	4295	3162	2331	4162	6741	1755
K02292	beta-carotene ketolase (CrtO type)	2	12	6	10	678	12	14	17	8	3
K09836	beta-carotene ketolase (CrtW type)	2	164	97	391	328	10	152	1259	339	11
K01193	beta-fructofuranosidase [EC:3.2.1.26]	250	11828	33025	2754	5947	30236	3953	2678	8783	55237
K00785	beta-galactosamide-alpha-2,3-sialyltransferase [EC:2.4.99.-]	2	1	2	12	6	0	5	2	2	0
K01190	beta-galactosidase [EC:3.2.1.23]	4424	65592	24320	15841	32117	15834	10452	13857	36070	39106
K12308	beta-galactosidase [EC:3.2.1.23]	590	17709	29056	19616	9636	10668	6864	5035	6931	651
K05350	beta-glucosidase [EC:3.2.1.21]	433	15282	29938	13963	13647	10634	12318	11594	17746	21106
K01188	beta-glucosidase [EC:3.2.1.21]	1535	29458	18121	7165	17473	13726	4383	4909	11062	1414
K05349	beta-glucosidase [EC:3.2.1.21]	86122	82524	95682	20766	45118	49241	12198	17317	28070	11848
K03488	beta-glucoside operon transcriptional antiterminator	253	675	26184	554	2373	17718	216	234	192	104
K01195	beta-glucuronidase [EC:3.2.1.31]	585	7622	165	1724	2975	1146	740	1610	1407	12601
K12373	beta-hexosaminidase [EC:3.2.1.52];hexosaminidase [EC:3.2.1.52]	2003	60023	19800	92836	53097	7006	16513	18176	50751	92094
K12979	beta-hydroxylase [EC:1.14.11.-]	96	116828	89473	97060	39514	61966	267	2762	1827	449
K10672	betaine reductase [EC:1.21.4.4]	314	223	233	155	2782	31	23622	8653	12421	850
K03451	betaine/carnitine transporter, BCCT family	82794	133	1823	1756	1865	915	14999	17018	54795	96183
K00130	betaine-aldehyde dehydrogenase [EC:1.2.1.8]	83154	133825	158243	112068	66540	127210	25636	27307	60251	26148
K00544	betaine-homocysteine S-methyltransferase [EC:2.1.1.5]	2	1084	22	5002	1610	1	98	371	396	6
K11610	beta-ketoacyl ACP reductase [EC:1.1.1.100]	3	8	5	140	30	6	7	10	27	1
K11609	beta-ketoacyl ACP synthase [EC:2.3.1.-]	7	10	10	279	40	12	15	19	77	2
K11608	beta-ketoacyl ACP synthase [EC:2.3.1.-]	0	6	1	1	1	3	3	7	0	0
K01467	beta-lactamase [EC:3.5.2.6]	83365	195302	94242	53236	78697	56185	45365	18046	38589	22582
K01844	beta-lysine 5,6-aminomutase [EC:5.4.3.3]	455	245	864	96	2782	690	20780	3288	1275	178
K01192	beta-mannosidase [EC:3.2.1.25]	1324	32394	30357	7441	9960	3269	4695	6369	17340	21523
K01207	beta-N-acetylhexosaminidase [EC:3.2.1.52]	83537	132560	72412	126141	86857	46232	48898	24236	43192	36484
K01838	beta-phosphoglucomutase [EC:5.4.2.6]	100	108	6361	8391	8931	2686	2837	3045	7676	14371
K01431	beta-ureidopropionase [EC:3.5.1.6]	37	74129	5961	167589	50789	28372	2589	4035	8028	761
K11953	bicarbonate transport system ATP-binding protein [EC:3.6.3.-]	2	0	4	10	677	12	15	121	13	21
K11952	bicarbonate transport system ATP-binding protein [EC:3.6.3.-]	2	0	4	10	677	12	14	14	6	2
K11951	bicarbonate transport system permease protein	2	0	4	10	677	12	14	14	6	2
K11950	bicarbonate transport system substrate-binding protein	2	0	4	10	677	12	14	14	6	2
K05588	bidirectional [NiFe] hydrogenase diaphorase subunit [EC:1.6.5.3];diaphorase subunit of the bidirectional hydrogenase [EC:1.6.5.3]	0	0	1	3	150	1	163	152	622	8
K05586	bidirectional [NiFe] hydrogenase diaphorase subunit [EC:1.6.5.3];diaphorase subunit of the bidirectional hydrogenase [EC:1.6.5.3]	0	0	1	3	145	1	157	123	602	8
K13074	biflaviolin synthase [EC:1.14.21.7]	0	1	23	1	1	128	1	0	0	0
K12524	bifunctional aspartokinase/homoserine dehydrogenase 1 [EC:2.7.2.4 1.1.1.3];bifunctional aspartokinase / homoserine dehydrogenase 1 [EC:2.7.2.4 1.1.1.3]	1571	18440	6442	6617	26130	931	13559	15711	45353	72402
K12525	bifunctional aspartokinase/homoserine dehydrogenase 2 [EC:2.7.2.4 1.1.1.3];bifunctional aspartokinase / homoserine dehydrogenase 2 [EC:2.7.2.4 1.1.1.3]	28	32	1147	101	4163	374	7438	8495	33203	68005
K13714	bifunctional autolysin [EC:3.5.1.28 3.2.1.96]	1	0	33	2	293	171	0	2	4	2
K13381	bifunctional chitinase/lysozyme [EC:3.2.1.14 3.2.1.17]	0	0	0	0	11	0	0	0	0	1
K12526	bifunctional diaminopimelate decarboxylase/aspartate kinase [EC:4.1.1.20 2.7.2.4];bifunctional diaminopimelate decarboxylase / aspartate kinase [EC:4.1.1.20 2.7.2.4]	4	561	19	965	10757	452	231	2061	11547	320
K00955	bifunctional enzyme CysN/CysC [EC:2.7.7.4 2.7.1.25]	165872	100992	94927	196532	72863	75972	3841	9050	6041	1180
K06168	bifunctional enzyme involved in thiolation and methylation of tRNA	84658	140154	65537	123594	95721	38299	73449	31635	60235	39884
K13522	bifunctional NMN adenylyltransferase/nudix hydrolase [EC:2.7.7.1 3.6.1.-]	29	3698	2374	8518	20788	1945	120	309	679	547
K04042	bifunctional UDP-N-acetylglucosamine pyrophosphorylase / Glucosamine-1-phosphate N-acetyltransferase [EC:2.7.7.23 2.3.1.157];bifunctional protein GlmU [EC:2.7.7.23 2.3.1.157]	167522	264438	149593	246338	177383	150229	141254	54527	93493	73089
K03453	bile acid:Na+ symporter, BASS family	166482	44236	52854	84776	35358	68875	11106	17332	45905	4679
K05386	bilin biosynthesis protein	0	0	0	2	133	0	1	2	2	2
K05385	bilin biosynthesis protein	0	0	0	2	133	0	1	2	2	2
K05384	bilin biosynthesis protein	0	0	0	2	142	0	4	4	2	2
K08100	bilirubin oxidase [EC:1.3.3.5]	2	2	129	113	297	104	40	167	44	10
K00214	biliverdin reductase [EC:1.3.1.24]	0	0	0	0	0	0	4	4	1	1
K11931	biofilm PGA synthesis lipoprotein PgaB [EC:3.-.-.-]	144	443	40186	1728	17427	29065	202	1985	11622	439
K11936	biofilm PGA synthesis N-glycosyltransferase PgaC [EC:2.4.-.-]	142	23	40174	1738	17607	29173	204	1988	11689	442
K11935	biofilm PGA synthesis protein PgaA	135	14	37634	236	17209	27801	65	1859	11458	422
K11937	biofilm PGA synthesis protein PgaD	12	10	39216	75	2099	29029	92	51	94	16
K12148	biofilm regulator BssS	2	4	562	36	1930	175	1	5	3	6
K03561	biopolymer transport protein ExbB	250897	275100	233156	78303	161373	148245	163415	57999	142046	137161
K03559	biopolymer transport protein ExbD	250601	323193	234000	189902	203629	157146	196426	65260	138893	63109
K03562	biopolymer transport protein TolQ	165815	130481	74168	114411	82206	49057	10172	15193	37403	36442
K03560	biopolymer transport protein TolR	165586	79772	71610	15259	52113	45728	3382	5956	22036	34711
K02170	biotin biosynthesis protein BioH	82909	1736	41774	1747	26332	30273	3337	5689	21537	34655
K15037	biotin carboxyl carrier protein	0	0	0	0	1	0	0	0	0	0
K08351	biotin sulfoxide reductase [EC:1.-.-.-]	3	201	139	2168	2186	56	46	69	13	8
K02169	biotin synthesis protein BioC;malonyl-CoA O-methyltransferase [EC:2.1.1.197]	83452	84519	54951	17366	52862	32900	41260	13979	34855	35006
K01012	biotin synthetase [EC:2.8.1.6]	84666	125706	68737	118792	94745	66241	70008	28843	57494	39379
K01947	biotin-[acetyl-CoA-carboxylase] ligase / type III pantothenate kinase [EC:6.3.4.15 2.7.1.33]	0	1	0	0	20	0	0	0	1	0
K08689	biphenyl 2,3-dioxygenase [EC:1.14.12.18]	4	23	1150	628	699	396	43	301	38	2
K00462	biphenyl-2,3-diol 1,2-dioxygenase [EC:1.13.11.39]	15	2021	2932	6854	2601	3272	111	442	552	18
K03524	BirA family transcriptional regulator, biotin operon repressor / biotin-[acetyl-CoA-carboxylase] ligase [EC:6.3.4.15]	84700	140867	82633	124129	96905	77096	73399	31279	58147	39917
K01518	bis(5'-nucleosidyl)-tetraphosphatase [EC:3.6.1.17]	1	2452	3	5997	494	1	7	11	11	4
K01525	bis(5'-nucleosyl)-tetraphosphatase (symmetrical) [EC:3.6.1.41]	82839	79749	53392	15170	51047	32272	5278	8083	23530	34698
K02172	bla regulator protein blaR1	0	422	0	0	1	2	4	3	0	0
K01372	bleomycin hydrolase [EC:3.4.22.40]	766	8947	11016	3724	7315	12771	2683	4001	14865	2833
K14588	blue copper oxidase	2	831	563	151	1946	175	1	6	3	6
K05527	BolA protein	82876	130392	55615	110745	80809	35510	9611	13217	35132	35465
K06011	bontoxilysin [EC:3.4.24.69]	0	8	0	0	1	0	41	18	14	6
K00826	branched-chain amino acid aminotransferase [EC:2.6.1.42]	85928	192855	88900	235114	141275	79057	89720	50241	103984	45878
K01996	branched-chain amino acid transport system ATP-binding protein	333655	1178712	316776	1025272	626383	165207	145502	79137	132160	12986
K01995	branched-chain amino acid transport system ATP-binding protein	333550	986288	294947	903889	567881	161927	144166	75735	126783	12798
K01998	branched-chain amino acid transport system permease protein	333549	1065863	305200	934183	578107	163227	147533	78969	130496	14402
K01997	branched-chain amino acid transport system permease protein	416340	1107065	306351	1015524	602737	163009	146984	77518	126074	14412
K01999	branched-chain amino acid transport system substrate-binding protein	416832	1764923	378036	1692621	911081	175191	178056	83493	131386	21773
K03311	branched-chain amino acid:cation transporter, LIVCS family	83263	1767	45908	1400	6868	41676	26333	8248	16689	36023
K00929	butyrate kinase [EC:2.7.2.7]	1142	4724	3762	250	5608	1165	21205	4142	2011	741
K01036	butyrate-acetoacetate CoA-transferase [EC:2.8.3.9]	0	0	0	3	14	0	66	25	23	7
K00248	butyryl-CoA dehydrogenase [EC:1.3.8.1];butyryl-CoA dehydrogenase [EC:1.3.99.2]	166328	115784	76254	88299	67757	53249	85337	22023	24662	13403
K11690	C4-dicarboxylate transporter, DctM subunit	83672	83911	39623	35525	38093	21476	48732	22604	48412	57637
K11689	C4-dicarboxylate transporter, DctQ subunit	83136	256	29306	16149	28470	20333	41800	14322	34968	37042
K03326	C4-dicarboxylate transporter, DcuC family	29	21	6232	68	2424	1703	6360	7214	19068	39509
K11688	C4-dicarboxylate-binding protein DctP	83295	79033	40240	17526	29517	21885	42143	14686	35673	38681
K14373	C-5 ketoreductase	0	0	47	2	1	370	0	0	1	0
K09829	C-8 sterol isomerase [EC:5.-.-.-]	2	1	0	0	2	2	2	1	2	0
K00908	Ca2+/calmodulin-dependent protein kinase [EC:2.7.11.17]	3	3	120	22	1387	26	225	71	267	160
K07300	Ca2+:H+ antiporter	78	99973	51034	26303	14680	31397	2802	4092	3425	5846
K01537	Ca2+-transporting ATPase [EC:3.6.3.8]	1348	10666	8146	8600	15082	15000	33483	13989	15662	28137
K03757	cadaverine:lysine antiporter	10	13	145	43	659	63	2363	1343	6385	32068
K00588	caffeoyl-CoA O-methyltransferase [EC:2.1.1.104]	11	436	1023	4733	2467	1472	2713	4159	13449	357
K12107	cag pathogenicity island protein 22	0	0	0	1	0	0	0	0	0	0
K10915	CAI-1 autoinducer synthase [EC:2.3.-.-]	8	9	6	8	36	8	2205	1629	6195	26749
K11045	cAMP factor	4	6	9488	24	725	1311	15	7	13	11
K07266	capsular polysaccharide export protein	33	14814	1826	1661	3101	3035	7784	8492	15052	931
K07265	capsular polysaccharide export protein	33	7605	1917	4303	3243	3035	7956	8809	17731	962
K09689	capsular polysaccharide transport system ATP-binding protein	36	7997	1346	4874	4187	598	11493	11220	18826	1163
K10107	capsular polysaccharide transport system permease protein	43	8882	1914	5636	4662	3049	9270	10480	17474	1185
K09688	capsular polysaccharide transport system permease protein	30	8768	1816	3412	2528	2609	5631	5235	6467	482
K00926	carbamate kinase [EC:2.7.2.2]	83480	1322	57029	3488	10035	37550	26513	11354	16344	2434
K01955	carbamoyl-phosphate synthase large subunit [EC:6.3.5.5]	85310	156529	83052	129502	98615	77206	74709	32430	61398	39608
K01956	carbamoyl-phosphate synthase small subunit [EC:6.3.5.5]	84668	141288	82717	123474	96687	77146	73505	31260	59967	39479
K00612	carbamoyltransferase [EC:2.1.3.-]	82766	20635	46357	15107	19666	34475	5131	7380	4622	333
K02647	carbohydrate diacid regulator	83173	209	44029	261	7322	31687	3709	4126	8903	35672
K10124	carbohydrate-specific outer membrane porin	0	3	561	35	582	173	0	2	0	4
K08696	carbon dioxide concentrating mechanism protein CcmK	4	0	14	30	2031	38	39	40	18	9
K08697	carbon dioxide concentrating mechanism protein CcmL	2	0	4	10	677	12	14	14	6	3
K08698	carbon dioxide concentrating mechanism protein CcmM	2	0	4	10	677	12	14	14	6	3
K08699	carbon dioxide concentrating mechanism protein CcmN	2	0	4	10	677	12	14	14	6	3
K08700	carbon dioxide concentrating mechanism protein CcmO	2	0	4	10	677	13	14	14	6	3
K14138	carbon monoxide dehydrogenase / acetyl-CoA synthase subunit alpha [EC:1.2.7.4 1.2.99.2 2.3.1.169]	437	290	495	3720	5073	14	22008	3945	2801	264
K00190	carbon monoxide dehydrogenase / acetyl-CoA synthase subunit beta [EC:1.2.7.4 1.2.99.2 2.3.1.169]	111	0	262	3	17	0	1016	467	424	63
K06200	carbon starvation protein	577	80139	71979	18388	37124	63742	3251	5106	3548	517
K03563	carbon storage regulator	83293	1271	97871	4224	13468	71363	6528	10958	24633	22806
K01673	carbonic anhydrase [EC:4.2.1.1]	166786	235810	167825	153132	110292	142669	52987	29262	60057	39544
K01672	carbonic anhydrase [EC:4.2.1.1]	0	4312	0	0	8	0	0	1	0	0
K01674	carbonic anhydrase [EC:4.2.1.1]	44	10689	5453	9106	19666	9748	4727	4100	8586	33672
K00198	carbon-monoxide dehydrogenase catalytic subunit [EC:1.2.99.2]	708	253	675	177	2859	17	21213	4205	3093	707
K00197	carbon-monoxide dehydrogenase gamma subunit [EC:1.2.99.2];acetyl-CoA decarbonylase/synthase complex subunit gamma [EC:2.1.1.-]	128	84	287	1804	2183	1	211	575	1390	22
K00196	carbon-monoxide dehydrogenase iron sulfur subunit	0	0	0	0	0	0	1	0	2	1
K03520	carbon-monoxide dehydrogenase large subunit [EC:1.2.99.2]	28	36515	997	101466	28138	1230	9704	10425	15126	1146
K03519	carbon-monoxide dehydrogenase medium subunit [EC:1.2.99.2]	490	130176	14572	112373	51794	4309	15842	14986	18690	1496
K03518	carbon-monoxide dehydrogenase small subunit [EC:1.2.99.2]	1312	130546	15211	113881	57130	5282	38786	21210	26176	1863
K08590	carbon-nitrogen hydrolase family protein	83733	13510	47207	4415	16063	39056	41874	14462	23529	3657
K00079	carbonyl reductase (NADPH) [EC:1.1.1.184];carbonyl reductase 1 [EC:1.1.1.184 1.1.1.189 1.1.1.197]	7	34	885	1011	17086	83	105	179	492	29
K05359	carboxycyclohexadienyl dehydratase [EC:4.2.1.91]	0	0	0	4	0	0	0	0	1	0
K06048	carboxylate-amine ligase [EC:6.3.-.-]	93	80708	45858	7256	22554	73084	6223	6183	4943	703
K01044	carboxylesterase [EC:3.1.1.1]	82770	2184	38204	7588	3390	28417	128	543	413	79
K03928	carboxylesterase [EC:3.1.1.1]	554	767	31390	6273	6671	47225	3092	2753	1842	565
K03927	carboxylesterase type B [EC:3.1.1.1]	122	49693	31789	95386	48895	39957	4705	7103	4431	379
K03797	carboxyl-terminal processing protease [EC:3.4.21.102]	169075	170777	109620	150478	121414	64993	79332	44489	105788	46007
K01061	carboxymethylenebutenolidase [EC:3.1.1.45]	188	249218	43129	227066	151945	46869	11715	13796	29592	20911
K13747	carboxynorspermidine decarboxylase [EC:4.1.1.-]	83756	15223	30894	20085	15627	23152	41431	12552	19891	35148
K13746	carboxynorspermidine dehydrogenase	10	11	8	10	41	11	3033	2140	7414	33826
K01289	carboxypeptidase [EC:3.4.16.-]	10	138	10	1202	783	10	1333	812	5650	1679
K13049	carboxypeptidase PM20D1 [EC:3.4.17.-]	208	577	11919	4378	2718	1912	136	316	100	31
K05996	carboxypeptidase T [EC:3.4.17.18]	0	1	70	3	2	524	1	1	2	0
K01299	carboxypeptidase Taq [EC:3.4.17.19]	347	65635	3926	174411	55959	1696	9362	9323	20621	34678
K01003	carboxyvinyl-carboxyphosphonate phosphorylmutase [EC:2.7.8.23]	82777	1592	44146	9890	4857	32684	503	1914	1373	374
K07736	CarD family transcriptional regulator	984	52410	20504	109098	35896	34243	30418	13616	17247	1528
K06131	cardiolipin synthase [EC:2.7.8.-]	84988	136813	89177	121949	122276	112085	36922	21065	51988	38956
K00624	carnitine O-acetyltransferase [EC:2.3.1.7]	5	5	2681	22	55	25840	51	60	15	12
K08279	carnitine operon protein CaiE	36	375	17262	140	1741	13482	1480	1142	6370	1962
K08299	carnitinyl-CoA dehydratase [EC:4.2.1.-]	22	41434	557	89809	26415	2606	3423	4947	11369	695
K11159	carotenoid cleavage dioxygenase	12	574	578	7375	1194	1081	205	513	891	16
K09835	carotenoid isomerase [EC:5.-.-.-]	194	1	3454	22	2490	2730	408	148	216	11
K11184	catabolite repression HPr-like protein	3	971	37	7	233	105	22	117	10	47
K00429	catalase [EC:1.11.1.6]	20	753	50438	6249	16840	37761	75	125	199	35
K03781	catalase [EC:1.11.1.6]	83516	102608	164569	43355	67903	157487	42405	16958	32353	47666
K03782	catalase/peroxidase [EC:1.11.1.6 1.11.1.7]	166786	173216	101440	194420	134239	65773	30256	42499	105367	80142
K03381	catechol 1,2-dioxygenase [EC:1.13.11.1]	63	86857	60443	9223	4301	39290	3093	2664	2299	1624
K00446	catechol 2,3-dioxygenase [EC:1.13.11.2]	40	1934	12476	15305	4723	7443	35074	4931	6168	289
K00545	catechol O-methyltransferase [EC:2.1.1.6]	3	2	3	140	18	2	3	5	5	0
K11327	cation efflux system protein involved in nickel and cobalt tolerance	0	0	0	2	132	0	1	2	2	1
K03295	cation efflux system protein, CDF family	83680	53211	49638	106719	81765	64447	47663	23116	43017	16098
K07232	cation transport protein ChaC	115	160495	53884	194480	82048	33107	6564	8251	14667	1254
K06197	cation transport regulator	5	6	158	7137	2999	162	56	1948	11440	292
K14393	cation/acetate symporter	83261	84418	87642	25966	38410	77851	111828	22927	28841	35620
K12953	cation-transporting ATPase F [EC:3.6.3.-]	0	0	6	0	10	58	0	2	23	0
K12954	cation-transporting ATPase G [EC:3.6.3.-]	0	0	1	0	0	0	2	3	22	0
K12955	cation-transporting ATPase I [EC:3.6.3.-]	0	2	59	138	21	432	1	3	2	1
K12956	cation-transporting ATPase V [EC:3.6.3.-]	0	0	0	0	0	9	0	0	22	0
K12949	cation-transporting P-type ATPase A/B [EC:3.6.3.-]	0	1	2	0	2	0	0	2	2	0
K12950	cation-transporting P-type ATPase C [EC:3.6.3.-]	0	1	1	139	24	2	62	54	41	4
K07168	CBS domain-containing membrane protein	142	93118	51559	13238	38860	33611	711	3118	3010	859
K07182	CBS domain-containing protein	165893	878	44905	8850	27274	32721	82016	23652	56675	106055
K00404	cb-type cytochrome c oxidase subunit I [EC:1.9.3.1];cytochrome c oxidase cb-type subunit I [EC:1.9.3.1]	165686	135135	122379	117191	98573	85169	45866	18383	40606	48226
K00405	cb-type cytochrome c oxidase subunit II [EC:1.9.3.1];cytochrome c oxidase cb-type subunit II	165931	135256	90611	129709	109353	58882	49270	24156	56726	51085
K00406	cb-type cytochrome c oxidase subunit III [EC:1.9.3.1];cytochrome c oxidase cb-type subunit III	82953	138446	89795	124938	99070	60918	47526	23133	46341	37336
K01534	Cd2+/Zn2+-exporting ATPase [EC:3.6.3.3 3.6.3.5]	86699	361394	138010	261139	174683	90077	93888	43535	69875	75456
K13246	c-di-GMP phosphodiesterase [EC:3.1.4.52]	4	4	3	4	14	5	1493	931	2946	17489
K13243	c-di-GMP-specific phosphodiesterase [EC:3.1.4.52]	0	0	0	0	6	0	0	0	0	1
K13245	c-di-GMP-specific phosphodiesterase [EC:3.1.4.52]	0	3834	29	411	226	12	4	9	3	2
K13244	c-di-GMP-specific phosphodiesterase [EC:3.1.4.52]	0	0	0	0	8	0	0	0	0	1
K00523	CDP-4-dehydro-6-deoxyglucose reductase [EC:1.17.1.1]	82840	145244	56094	171726	90871	34006	348	3684	13179	883
K12452	CDP-6-deoxy-D-xylo-4-hexulose-3-dehydrase	180	302	13720	1188	387	11117	2462	2706	2302	213
K01521	CDP-diacylglycerol pyrophosphatase [EC:3.6.1.26]	4	19	147	664	7157	283	8	12	9	9
K00995	CDP-diacylglycerol--glycerol-3-phosphate 3-phosphatidyltransferase [EC:2.7.8.5]	167743	179299	108317	208924	126829	99644	84076	41756	69017	53705
K00999	CDP-diacylglycerol--inositol 3-phosphatidyltransferase [EC:2.7.8.11]	2	16	0	15	0	1	1	5	24	0
K01709	CDP-glucose 4,6-dehydratase [EC:4.2.1.45]	256	6763	30855	5525	4048	23997	5315	6145	6961	740
K09809	CDP-glycerol glycerophosphotransferase [EC:2.7.8.12]	1	242	23	9	271	189	111	591	435	451
K12454	CDP-paratose 2-epimerase [EC:5.1.3.10]	5	6584	163	4962	1753	160	398	619	469	43
K09772	cell division inhibitor SepF	683	1458	21322	1008	6094	41399	24073	5546	2894	361
K13053	cell division inhibitor SulA	82766	302	41632	1411	9223	30211	2079	2837	7175	22081
K04074	cell division initiation protein	328	639	3605	5681	3017	10362	3458	4692	3090	575
K03798	cell division protease FtsH [EC:3.4.24.-]	168259	144815	92783	138797	109684	85791	99153	39625	64724	40086
K13052	cell division protein DivIC	219	609	3309	24	677	10458	68	585	84	58
K03590	cell division protein FtsA	84215	139926	64868	123162	91830	46022	49904	25650	57173	39149
K05589	cell division protein FtsB	82848	79832	53396	18012	52171	32573	4186	7131	23582	35194
K03587	cell division protein FtsI (penicillin-binding protein 3) [EC:2.4.1.129]	84075	140327	78827	124297	95447	66797	52066	28736	59330	39371
K03586	cell division protein FtsL	82838	79748	53389	15169	51030	32270	3356	5941	21982	34680
K03591	cell division protein FtsN	2	4	563	37	2023	175	1	6	4	7
K03589	cell division protein FtsQ	84339	140731	81352	124095	97105	69391	37492	25036	55199	39172
K03588	cell division protein FtsW	84794	141515	86004	124166	97057	78522	73441	31284	59451	39522
K03531	cell division protein FtsZ	84755	183142	83189	207923	122713	77027	77491	33427	61754	39553
K09888	cell division protein ZapA	84189	139933	63639	115652	90250	37210	34649	21730	53145	38598
K03528	cell division protein ZipA	82791	324	41590	809	9135	30249	3303	5873	21661	34612
K03608	cell division topological specificity factor	83396	124858	53949	108221	66400	32304	26271	9954	17448	34757
K09812	cell division transport system ATP-binding protein	84581	140673	79505	119782	76693	49941	73050	30503	59416	39377
K09811	cell division transport system permease protein	84574	140604	77975	119131	76700	49677	73059	30398	59388	39374
K04095	cell filamentation protein	226	8452	27858	6604	5726	20002	181	318	315	100
K11105	cell volume regulation protein A	83557	38479	46495	94372	33464	31116	39225	9505	20014	17131
K13274	cell wall-associated protease [EC:3.4.21.-]	0	0	0	0	14	0	0	0	2	0
K00702	cellobiose phosphorylase [EC:2.4.1.20]	50	8	29	15	831	24	586	1321	396	58
K10243	cellobiose transport system ATP-binding protein	26	704	14812	1215	2933	4756	2536	1997	1447	73
K10241	cellobiose transport system permease protein	14	141	11417	291	642	2547	2446	1931	1329	53
K10242	cellobiose transport system permease protein	14	140	11412	289	631	2506	30	26	24	20
K10240	cellobiose transport system substrate-binding protein	16	141	11477	292	666	2973	2452	1940	1331	53
K01225	cellulose 1,4-beta-cellobiosidase [EC:3.2.1.91]	50	68	28	32	771	1	1	2	1	1
K00694	cellulose synthase (UDP-forming) [EC:2.4.1.12]	58	11239	11228	11268	13685	8305	3239	5584	14380	12935
K05311	central glycolytic genes regulator	81	647	3488	66	1922	1640	21263	3153	1318	199
K01060	cephalosporin-C deacetylase [EC:3.1.1.41]	128	1609	29210	4393	3783	6221	189	474	149	74
K00720	ceramide glucosyltransferase [EC:2.4.1.80]	16	2055	262	14493	4540	349	2573	1705	1888	55
K05789	chain length determinant protein (polysaccharide antigen chain regulator)	35	0	1	2	1362	2	1	3	2	2
K00660	chalcone synthase [EC:2.3.1.74]	114	1840	32456	13534	6345	41899	1932	1511	6293	1812
K12519	chaperone protein PapD	0	0	848	2	25	239	0	1	1	3
K04077	chaperonin GroEL	84761	228805	92430	304235	151983	110190	75926	33102	65956	58648
K04078	chaperonin GroES	84743	223038	83273	302977	150492	79059	78307	36156	67513	58658
K06596	chemosensory pili system protein ChpA (sensor histidine kinase/response regulator)	82806	78691	52766	4681	43327	32074	187	3329	12506	559
K06597	chemosensory pili system protein ChpB (putative protein-glutamate methylesterase)	82747	280	8126	556	6507	4725	88	3081	12260	481
K06598	chemosensory pili system protein ChpC	82757	288	40999	657	6926	30030	169	3399	12776	493
K06600	chemosensory pili system protein ChpE	7	3	7128	59	295	4252	4	5	37	3
K03410	chemotaxis protein CheC	571	914	2429	906	4130	486	57707	8268	8817	32647
K03411	chemotaxis protein CheD [EC:3.5.1.44]	947	123075	28093	88036	69587	13419	42139	13257	21821	19474
K03409	chemotaxis protein CheX	886	39572	714	80008	26929	196	6589	5492	11369	34496
K03414	chemotaxis protein CheZ	82893	80952	53172	18970	50732	32194	3579	5164	11202	34888
K00575	chemotaxis protein methyltransferase CheR [EC:2.1.1.80]	167992	153468	115478	125494	100135	74229	52440	27596	61180	70126
K13486	chemotaxis protein methyltransferase WspC	13	1098	39377	5076	2161	29036	97	1207	806	183
K02556	chemotaxis protein MotA	249298	132750	96406	116880	105503	63968	103083	34004	64912	53198
K02557	chemotaxis protein MotB	332955	186322	101605	222074	146407	63837	151740	53475	110727	60789
K10564	chemotaxis protein MotC	15	45296	286	84433	24914	20	190	323	179	70
K10565	chemotaxis protein MotD	15	41188	204	84954	25369	11	83	131	90	39
K13488	chemotaxis-related protein WspB	13	1098	39377	5076	2161	29036	97	1207	806	182
K13489	chemotaxis-related protein WspD	13	1098	39377	5076	2161	29036	97	1207	806	183
K01452	chitin deacetylase [EC:3.5.1.41]	82759	178	1818	426	3152	805	3698	4401	7443	420
K00698	chitin synthase [EC:2.4.1.16]	0	12	0	0	0	0	0	0	0	0
K01183	chitinase [EC:3.2.1.14]	129	5652	48459	1810	5991	31463	14388	12514	31886	118331
K03933	chitin-binding protein	69	804	43752	240	2965	33902	5181	3655	14270	64508
K14659	chitooligosaccharide deacetylase [EC:3.5.1.-]	3	7698	27	6026	1644	1	8	39	12	4
K01233	chitosanase [EC:3.2.1.132]	1	4	142	2401	529	724	22	41	11	4
K00638	chloramphenicol O-acetyltransferase [EC:2.3.1.28]	83349	73688	16807	163236	59241	11774	8843	9409	29270	48699
K05786	chloramphenicol-sensitive protein RarD	165772	127533	108527	96863	55782	98950	9930	14591	35682	37761
K03281	chloride channel protein, CIC family	1108	131413	34808	110328	48244	7963	16718	22287	48798	36967
K00433	chloride peroxidase [EC:1.11.1.10]	148	34304	62783	34896	16731	50160	2885	3034	2162	174
K14597	chlorobactene glucosyltransferase	191	0	1	16	1501	1	86	1231	362	9
K01860	chloromuconate cycloisomerase [EC:5.5.1.7]	0	0	0	17	1	0	0	0	0	0
K08921	chlorophyll a/b binding light-harvesting protein PcbD	0	0	0	0	1	0	1	0	0	0
K04040	chlorophyll synthase [EC:2.5.1.62]	10	498	143	3967	2609	23	589	762	740	125
K11333	chlorophyllide reductase iron protein subunit X [EC:1.18.6.1]	9	500	136	5367	1861	9	356	342	329	77
K11334	chlorophyllide reductase subunit Y;chlorophyllide reductase subunit Y [EC:1.18.1.-]	9	500	135	5367	1859	9	183	317	245	48
K11335	chlorophyllide reductase subunit Z;chlorophyllide reductase subunit Z [EC:1.18.-.-]	9	500	136	5367	1861	9	356	342	329	77
K10928	cholera enterotoxin subunit A [EC:2.4.2.36]	2	2	2	2	11	3	1023	705	2198	11922
K10929	cholera enterotoxin subunit B	2	2	2	2	11	3	1023	705	2198	11922
K10921	cholera toxin transcriptional activator	10	11	8	10	41	11	3033	2140	7415	33828
K03333	cholesterol oxidase [EC:1.1.3.6]	30	301	16031	1991	587	13636	4217	2630	7804	14295
K11440	choline dehydrogenase [EC:1.1.1.1]	0	0	0	0	10	0	8	5	6	2
K00108	choline dehydrogenase [EC:1.1.99.1]	83034	260284	118147	214420	114449	104227	17745	22951	48760	30469
K00499	choline monooxygenase [EC:1.14.15.7]	3	142	1454	492	16521	836	11	40	2	114
K00968	choline-phosphate cytidylyltransferase [EC:2.7.7.15]	2	1	5	4	84	6	35	1783	11377	285
K01133	choline-sulfatase [EC:3.1.6.6]	45	42855	40280	87039	28212	29580	4103	6481	12323	981
K01442	choloylglycine hydrolase [EC:3.5.1.24]	144	18611	20402	11199	3274	13242	8232	7953	13342	57935
K13500	chondroitin synthase [EC:2.4.1.175 2.4.1.226]	0	0	0	0	1	0	0	2	1002	2
K08961	chondroitin-sulfate-ABC endolyase/exolyase [EC:4.2.2.20 4.2.2.21]	6	4	457	1345	110	119	1	1	0	4
K11782	chorismate futalosine-lyase [EC:4.1.99.-]	1	2	88	5	6	719	1	1	1	1
K14170	chorismate mutase / prephenate dehydratase [EC:5.4.99.5 4.2.1.51]	166819	160051	85749	37953	107126	47820	114260	32007	63818	71211
K14187	chorismate mutase / prephenate dehydrogenase [EC:5.4.99.5 1.3.1.12]	28	31	1202	104	4183	619	7512	7030	22414	67765
K06208	chorismate mutase [EC:5.4.99.5]	359	547	411	1813	4519	643	3062	2207	1498	79
K04092	chorismate mutase [EC:5.4.99.5]	66	47715	25802	86263	29870	43271	6161	7149	12975	780
K04093	chorismate mutase [EC:5.4.99.5]	120	8	140	81	865	279	19	52	71	8
K06209	chorismate mutase [EC:5.4.99.5]	280	708	463	34	3192	224	20946	3345	1310	242
K04516	chorismate mutase [EC:5.4.99.5]	717	8862	4578	3670	6699	8795	3463	4676	15648	2877
K01850	chorismate mutase [EC:5.4.99.5]	423	8863	39376	4342	2539	29508	248	1420	427	62
K01736	chorismate synthase [EC:4.2.3.5]	84669	140871	82629	124068	96841	77242	73492	31244	59957	39479
K03181	chorismate--pyruvate lyase [EC:4.1.3.40]	82832	81341	62930	13723	28986	39675	3333	5752	21659	34660
K07240	chromate transporter	168928	293806	97022	130050	131744	42557	77138	28835	51279	41541
K02313	chromosomal replication initiator protein	84807	140869	83017	124232	98483	77101	75885	32405	60982	39961
K03632	chromosome partition protein MukB	12	15	571	48	2067	186	3034	2146	7544	33835
K03804	chromosome partition protein MukE	12	15	571	48	2067	186	3034	2146	7543	33835
K03633	chromosome partition protein MukF	12	15	571	48	2067	186	3034	2146	7544	33835
K03496	chromosome partitioning protein	251318	281382	213172	278055	218465	180805	118480	62900	117209	102426
K03497	chromosome partitioning protein, ParB family	168567	422037	119292	584149	267654	106493	116626	61352	104561	76542
K03529	chromosome segregation protein	83907	129841	73835	120288	88383	74945	33187	19098	31726	2099
K11686	chromosome-anchoring protein RacA	0	0	15	6	61	87	8	9	3	1
K08480	circadian clock protein KaiA	2	0	6	16	945	14	90	24	12	6
K08481	circadian clock protein KaiB	3	3493	58	1990	1864	63	125	110	67	15
K08482	circadian clock protein KaiC	94	6743	37352	14934	5408	27451	582	1703	1074	256
K14582	cis-1,2-dihydro-1,2-dihydroxynaphthalene/dibenzothiophene dihydrodiol dehydrogenase [EC:1.3.1.29 1.3.1.60]	0	2	21	11	35	1	1	0	0	0
K08690	cis-2,3-dihydrobiphenyl-2,3-diol dehydrogenase [EC:1.3.1.56]	1	127	3	1	68	1	1	1	0	0
K01643	citrate lyase subunit alpha / citrate CoA-transferase [EC:4.1.3.6 2.8.3.10];citrate lyase subunit alpha [EC:4.1.3.6]	452	452	7501	1277	5430	3182	22980	7095	5294	15329
K01644	citrate lyase subunit beta [EC:4.1.3.6];citrate lyase subunit beta / citryl-CoA lyase [EC:4.1.3.6 4.1.3.34]	83674	521219	166795	687808	377473	202103	105798	36675	51409	18156
K01646	citrate lyase subunit gamma [EC:4.1.3.6]	78	196	3497	81	1211	1515	1427	1393	2725	13485
K01647	citrate synthase [EC:2.3.3.1]	84730	299216	118016	313995	175472	84476	56575	32747	65939	39524
K13795	citrate/tricarballylate utilization protein	17	1320	3916	15722	23981	2244	2365	1220	1552	42
K09477	citrate:succinate antiporter	0	0	1	1	23	0	0	0	1	1
K03300	citrate-Mg2+:H+ or citrate-Ca2+:H+ symporter, CitMHS family	82813	1393	86914	3104	3845	79864	209	2820	1752	476
K13775	citronellol/citronellal dehydrogenase	82768	3434	29647	11147	9022	15655	399	2545	11802	386
K13774	citronellol/citronellal dehydrogenase	82759	78	39455	2822	17978	28521	103	255	198	63
K11731	citronellyl-CoA dehydrogenase [EC:1.3.99.-]	82766	341	52955	4849	2301	31708	153	539	461	65
K13776	citronellyl-CoA synthetase [EC:6.2.1.-]	82762	40	40980	190	1610	29801	45	161	152	50
K12675	clavaminate synthase [EC:1.14.11.21]	2	16	10	15	0	90	1	5	3	1
K08587	clostripain [EC:3.4.22.8]	0	0	0	0	0	0	2	0	0	0
K14201	clumping factor A	0	0	0	0	19	62	0	1	2	1
K14192	clumping factor B	0	0	0	0	19	62	0	1	2	1
K03698	CMP-binding protein	799	780	4056	1263	1861	10355	3059	2791	2016	628
K07321	CO dehydrogenase maturation factor	570	212	584	1927	4042	970	21553	4294	3106	686
K08255	CoA-disulfide reductase [EC:1.8.1.14]	1	0	17	2	241	86	1	3	617	4
K00798	cob(I)alamin adenosyltransferase [EC:2.5.1.17]	166440	125830	94642	119999	122235	64271	17524	24240	51369	37249
K13786	cob(II)yrinic acid a,c-diamide reductase [EC:1.16.8.1]	15	45616	208	83933	25324	12	88	177	99	40
K02188	cobalamin biosynthesis protein CbiD;cobalt-precorrin-5B (C1)-methyltransferase [EC:2.1.1.195]	1099	45074	34815	81696	29862	26943	27016	7676	5898	883
K13541	cobalamin biosynthesis protein CbiG / precorrin-3B C17-methyltransferase [EC:2.1.1.131];cobalt-precorrin 5A hydrolase / precorrin-3B C17-methyltransferase [EC:3.7.1.12 2.1.1.131]	82802	7843	80303	4688	5531	56523	8920	8438	8208	1029
K02189	cobalamin biosynthesis protein CbiG;cobalt-precorrin 5A hydrolase [EC:3.7.1.12]	657	45487	42930	90181	47537	33044	24686	9814	14149	1405
K02234	cobalamin biosynthesis protein CobW	76	75406	41222	168703	53408	32133	6275	8077	14337	1216
K02225	cobalamin biosynthetic protein CobC	82790	44779	42344	95048	45624	32966	6259	8179	14199	986
K02009	cobalt transport protein	35	537	3346	106	1983	754	653	527	218	47
K02006	cobalt/nickel transport system ATP-binding protein	3413	16431	76241	11081	34350	127181	158228	33695	32234	23719
K02008	cobalt/nickel transport system permease protein	2743	15083	65789	12298	44499	105358	110825	25000	27818	23164
K02007	cobalt/nickel transport system permease protein	821	1595	6784	3631	6933	10465	58646	9357	10062	930
K02230	cobaltochelatase CobN [EC:6.6.1.2]	83459	53674	46815	94415	49466	34862	9421	10577	16697	1067
K09882	cobaltochelatase CobS [EC:6.6.1.2]	47	50855	9506	96340	48084	7123	7541	9308	16325	13176
K09883	cobaltochelatase CobT [EC:6.6.1.2]	40	50848	2488	95847	30005	3340	6359	7556	13358	789
K02224	cobyrinic acid a,c-diamide synthase [EC:6.3.5.9 6.3.1.-];cobyrinic acid a,c-diamide synthase [EC:6.3.5.9 6.3.5.11]	167124	105486	88808	198989	143504	68286	42141	28286	45801	4645
K08605	coccolysin [EC:3.4.24.30]	10	1	2469	6	48	1059	0	0	0	0
K00441	coenzyme F420 hydrogenase beta subunit [EC:1.12.98.1]	14	31989	280	81188	24592	261	2884	2481	1856	105
K00442	coenzyme F420 hydrogenase delta subunit	0	0	0	0	4	0	69	133	696	3
K12234	coenzyme F420-0:L-glutamate ligase / coenzyme F420-1:gamma-L-glutamate ligase [EC:6.3.2.31 6.3.2.34];F420-0:gamma-glutamyl ligase [EC:6.3.2.-]	55	793	35278	3783	4325	6850	6678	6786	9097	234
K00320	coenzyme F420-dependent N5,N10-methenyltetrahydromethanopterin reductase [EC:1.5.99.11]	7	120	204	495	931	1539	2596	2242	1893	57
K03208	colanic acid biosynthesis glycosyl transferase WcaI	13	241	6601	616	1699	3770	1215	547	5306	1676
K03207	colanic acid biosynthesis protein WcaH [EC:3.6.1.-]	121	5	6356	18	1585	3734	516	303	781	5573
K03704	cold shock protein (beta-ribbon, CspA family)	416658	543418	333979	630900	288760	256670	115261	87141	185412	153391
K03646	colicin import membrane protein	82903	80456	51758	17692	51443	31281	3355	5993	21933	34679
K06237	collagen, type IV, alpha	0	0	0	2	35	0	583	1212	384	38
K12293	competence factor transport accessory protein ComB	0	0	1	0	46	56	0	0	0	0
K06198	competence protein CoiA	20	86	3214	12	199	10158	6	3	3	5
K02237	competence protein ComEA	83798	81057	75334	23876	57093	73340	65272	19425	36179	48048
K02238	competence protein ComEC	84737	128256	82842	123141	97304	76858	94709	34458	61393	39657
K02239	competence protein ComER	3	423	37	8	75	105	8	9	3	1
K02240	competence protein ComFA	97	510	3250	23	478	10339	20	18	38	8
K02241	competence protein ComFB	162	1	290	14	787	0	496	338	121	47
K02242	competence protein ComFC	77	549	4104	73	1674	10370	35852	5039	4309	264
K02243	competence protein ComGA	97	88	3250	21	478	10348	20	16	37	8
K02244	competence protein ComGB	23	89	3249	21	438	11373	21	17	23	10
K02245	competence protein ComGC	97	88	3249	21	439	10339	20	16	37	8
K02246	competence protein ComGD	3	104	21	11	225	8913	44	290	20	7
K02247	competence protein ComGE	0	0	15	6	60	87	3	4	2	1
K02248	competence protein ComGF	13	17	2488	15	203	9911	18	14	6	5
K02249	competence protein ComGG	0	0	1	4	36	0	5	5	1	1
K02250	competence protein ComK	1	3	32	12	242	173	13	14	9	2
K02251	competence protein ComQ	3	2	23	1	16	14	0	3	2	1
K12296	competence protein ComX	4	7	5	4	147	8819	6	2	3	4
K02253	competence protein ComX	0	0	0	0	5	0	0	0	0	0
K02254	competence protein ComZ	0	0	15	6	59	87	8	9	2	0
K03742	competence/damage-inducible protein CinA	1675	11817	9200	18797	19379	11035	36436	20193	38956	37754
K12415	competence-stimulating peptide	0	0	1	0	40	13	0	0	0	0
K03317	concentrative nucleoside transporter, CNT family	606	9385	5812	10578	14977	30126	15282	17570	45106	116458
K00154	coniferyl-aldehyde dehydrogenase [EC:1.2.1.68]	82829	38262	43645	93229	46029	33438	4768	6072	23353	52851
K12063	conjugal transfer ATP-binding protein TraC	32	3478	3052	1416	2259	5876	35005	4385	5712	17675
K12056	conjugal transfer mating pair stabilization protein TraG	33	3471	3492	1665	2911	6126	35005	4548	5604	17679
K12058	conjugal transfer mating pair stabilization protein TraN	23	3455	3264	1629	2266	5940	1563	1664	3037	17520
K12062	conjugal transfer pilin signal peptidase TrbI	20	3465	3035	1388	1996	5768	1091	1306	2401	11951
K12069	conjugal transfer pilus assembly protein TraA	3	15	14	8	124	4	1030	722	2325	11924
K12065	conjugal transfer pilus assembly protein TraB	33	3477	9378	1391	2352	9512	35007	4387	5714	17676
K12071	conjugal transfer pilus assembly protein TraD	5	147	677	493	16550	45	1046	732	2333	11940
K12067	conjugal transfer pilus assembly protein TraE	21	3466	1894	1326	1950	5617	1580	1529	3392	17519
K12057	conjugal transfer pilus assembly protein TraF	23	3474	3503	1738	2822	6111	1589	1713	3409	17525
K12070	conjugal transfer pilus assembly protein TraI	5	131	676	481	16544	45	1036	723	2325	11938
K12066	conjugal transfer pilus assembly protein TraK	21	3465	3031	1381	2126	5849	1562	1530	3148	17518
K12068	conjugal transfer pilus assembly protein TraL	16	3460	2523	1170	1746	3374	1551	1354	3132	17511
K12060	conjugal transfer pilus assembly protein TraU	33	3479	3284	1579	2379	5957	35010	4534	5724	17678
K12064	conjugal transfer pilus assembly protein TraV	21	235	2590	1094	1803	5640	1553	1507	3024	17514
K12061	conjugal transfer pilus assembly protein TraW	33	3480	3350	1631	2445	6106	35011	4563	5728	17679
K12059	conjugal transfer pilus assembly protein TrbC	21	3452	2838	1548	2242	5818	539	958	834	5596
K12072	conjugative transfer pilus assembly protein TraH	23	3473	3058	1656	2793	5992	1567	1710	3167	17522
K05812	conserved hypothetical protein	82781	1332	42929	4667	20310	30870	3137	3474	9421	34331
K05810	conserved hypothetical protein	83535	135620	80869	119981	88219	79265	70005	26302	44166	36585
K07723	CopG family transcriptional regulator	158	547	328	64	883	107	569	457	113	37
K07722	CopG family transcriptional regulator, nickel-responsive regulator	162	4849	858	7656	2080	2758	2711	2520	3671	867
K06201	copper homeostasis protein	1036	55878	23200	88363	40276	13531	6474	6476	22673	36798
K06079	copper homeostasis protein (lipoprotein)	2	4	562	36	1907	175	1	5	2	6
K07233	copper resistance protein B	82826	87219	46025	19075	19089	32760	2647	6942	16117	737
K14166	copper transport protein	19	39616	335	86361	26207	814	2519	2140	1437	80
K00228	coproporphyrinogen III oxidase [EC:1.3.3.3]	82891	128472	55951	113642	86621	35656	45529	20190	44483	37384
K05383	CpeT protein	0	0	0	2	133	0	1	2	2	2
K06199	CrcB protein	84308	140740	96235	130103	92043	98332	54860	30454	61039	39916
K05805	CreA protein	82857	123152	53456	93584	47471	32020	4999	6565	15485	34362
K08688	creatinase [EC:3.5.3.3]	38	31859	2855	78050	26737	26015	3644	5188	11482	715
K01470	creatinine amidohydrolase [EC:3.5.2.10]	650	153467	25274	343513	124086	11995	6971	6615	5241	1058
K09951	CRISPR-associated protein Cas2	345	37	3298	4675	5275	492	3198	4975	3379	5632
K01160	crossover junction endodeoxyribonuclease RusA [EC:3.1.22.4]	2	2	850	297	123	239	1	2	3	4
K01159	crossover junction endodeoxyribonuclease RuvC [EC:3.1.22.4]	84357	140750	79381	124051	96068	66767	73309	30890	59751	39384
K02182	crotonobetaine/carnitine-CoA ligase [EC:6.2.1.-]	8	4275	1968	17681	23820	598	142	559	710	34
K08297	crotonobetainyl-CoA dehydrogenase [EC:1.3.99.-]	0	0	0	45	61	0	0	0	4	1
K08298	crotonobetainyl-CoA:carnitine CoA-transferase [EC:2.8.3.-]	0	0	0	45	61	0	0	0	4	1
K14446	crotonyl-CoA carboxylase/reductase	17	1000	369	6191	2767	1487	8338	8454	13935	737
K01420	CRP/FNR family transcriptional regulator, anaerobic regulatory protein	84692	257697	95082	239987	153263	81213	81009	41571	76681	54252
K10914	CRP/FNR family transcriptional regulator, cyclic AMP receptor protein	82779	316	41655	2151	9562	30227	3370	6034	21845	34357
K13642	CRP/FNR family transcriptional regulator, transcriptional activator FtrB	1	7012	30	941	338	13	2351	1421	1461	12
K04496	C-terminal binding protein	0	1	0	16	0	0	1	4	0	0
K08320	CTP pyrophosphohydrolase [EC:3.6.1.-]	2	3	138	35	1857	56	1	6	616	6
K01937	CTP synthase [EC:6.3.4.2]	84704	140752	82700	125127	97411	77159	54801	28352	58762	39345
K07787	Cu(I)/Ag(I) efflux system membrane protein CusA	83638	17549	23900	15219	51624	13833	43364	17862	45436	25530
K07798	Cu(I)/Ag(I) efflux system membrane protein CusB	83633	13242	20433	15506	51565	11117	43297	17668	45395	25491
K07796	Cu(I)/Ag(I) efflux system outer membrane protein CusC	5	1	428	4	1468	123	11	428	309	446
K07810	Cu(I)/Ag(I) efflux system periplasmic protein CusF	12	3368	4153	798	3831	3006	96	134	140	22
K04565	Cu/Zn superoxide dismutase [EC:1.15.1.1]	82849	94644	16160	29799	40880	7108	4952	6106	12770	34184
K01533	Cu2+-exporting ATPase [EC:3.6.3.4]	250953	286239	157918	244109	204459	121805	127838	63163	127442	79027
K11312	cupin 2 domain-containing protein	163	588	956	4346	781	34	35797	5732	9688	22076
K04337	curli production assembly/transport component CsgE	5	3	10980	21	1442	8495	10	22	160	23
K04338	curli production assembly/transport component CsgF	25	21	11099	3591	1740	8640	1286	440	5760	1962
K06214	curli production assembly/transport component CsgG	26	4158	11123	4851	1867	8560	1472	523	5794	1974
K04336	curli production protein	2	0	1	1	1314	2	1	2	2	2
K05516	curved DNA-binding protein	83102	9835	43046	12628	33565	31007	38493	12304	14324	2727
K08095	cutinase [EC:3.1.1.74]	20	15	46	702	101	206	35	47	144	7
K01725	cyanate lyase [EC:4.2.1.104]	24	1745	34692	6303	19609	26503	2508	1660	1570	59
K03802	cyanophycin synthetase [EC:6.-.-.-]	150	81061	14436	18551	60130	3350	327	837	1140	210
K13282	cyanophycinase [EC:3.4.15.6]	124	554	14766	8944	2845	2134	398	3670	12258	347
K03383	cyanuric acid amidohydrolase [EC:3.5.2.15]	3	41	50	312	16	392	182	86	36	11
K06202	CyaY protein	82813	79470	53213	15422	30369	31997	3183	5172	20456	34368
K14671	cyclase	1	2	87	5	6	701	3	2	2	2
K05555	cyclase [EC:4.-.-.-]	0	1	66	3	8	562	4	9	11	1
K02500	cyclase HisF [EC:4.1.3.-];cyclase [EC:4.1.3.-]	84448	139011	83706	123094	96203	76924	87082	31715	61879	45182
K05716	cyclic 2,3-diphosphoglycerate synthetase [EC:4.6.1.-]	0	0	0	0	22	0	0	0	0	0
K13688	cyclic beta-1,2-glucan synthetase [EC:2.4.1.-]	32	44967	1195	84792	27391	914	2472	1768	1743	182
K14051	cyclic di-GMP phosphodiesterase Gmr [EC:3.1.4.52]	2	1	1	0	1333	3	1	3	2	2
K13593	cyclic-di-GMP phosphodiesterase, flagellum assembly factor TipF	3	4609	69	6573	1030	13	212	557	179	42
K07537	cyclohexa-1,5-dienecarbonyl-CoA hydratase [EC:4.2.1.100]	0	1	92	2218	114	0	42	34	47	2
K00220	cyclohexadienyl dehydrogenase [EC:1.3.1.43];cyclohexadieny/prephenate dehydrogenase [EC:1.3.1.43 1.3.1.12]	35	92586	1601	169474	51626	211	334	814	300	123
K04116	cyclohexanecarboxylate-CoA ligase [EC:6.2.1.-]	6	53	552	3969	765	2406	32	265	28	10
K04117	cyclohexanecarboxyl-CoA dehydrogenase [EC:1.3.99.-]	1	32	713	3751	538	802	22	88	17	3
K03379	cyclohexanone monooxygenase [EC:1.14.13.22]	82785	984	19973	11564	4084	17686	341	1267	1231	84
K00701	cyclomaltodextrin glucanotransferase [EC:2.4.1.19]	2	253	7	475	5354	226	169	39	940	160
K01208	cyclomaltodextrinase [EC:3.2.1.54]	2	0	5	10	691	18	15	19	6	5
K00574	cyclopropane-fatty-acyl-phospholipid synthase [EC:2.1.1.79]	165786	212708	94915	293849	193301	68826	18883	24462	62363	51981
K14155	cystathione beta-lyase [EC:4.4.1.8]	1640	103975	65868	239537	96756	68565	49725	19745	41311	44569
K01760	cystathionine beta-lyase [EC:4.4.1.8]	491	212995	41779	130939	84352	37913	42617	14288	32709	26349
K01697	cystathionine beta-synthase [EC:4.2.1.22]	312	34463	44501	91130	40808	45612	7614	11259	35166	4969
K01758	cystathionine gamma-lyase [EC:4.4.1.1]	39	65113	16488	167875	56509	12912	4444	7343	19108	835
K01739	cystathionine gamma-synthase [EC:2.5.1.48]	251	6304	48888	16809	14472	88838	41740	12413	30422	34710
K11717	cysteine desulfurase / selenocysteine lyase [EC:2.8.1.7 4.4.1.16]	85058	201185	58555	230421	173860	66533	117654	44850	90772	9737
K04487	cysteine desulfurase [EC:2.8.1.7]	85387	141065	136850	139973	118625	143669	98393	39727	66557	43110
K02426	cysteine desulfuration protein SufE	83549	64835	63104	105410	49547	61198	48859	23130	55069	38513
K00456	cysteine dioxygenase [EC:1.13.11.20]	0	0	0	2	8	0	52	165	266	5
K01766	cysteine sulfinate desulfinase [EC:4.4.1.-]	82767	48	41562	189	3633	29988	3090	3327	8384	34036
K01738	cysteine synthase A [EC:2.5.1.47]	85191	257153	135896	380712	184146	168934	102206	43280	84404	72518
K12339	cysteine synthase B [EC:2.5.1.47]	82979	79534	53701	16577	48477	32853	5948	7081	12322	14254
K11249	cysteine/O-acetylserine efflux protein	176	5	6	7	1619	5	545	347	1203	12570
K01883	cysteinyl-tRNA synthetase [EC:6.1.1.16]	84829	141380	86175	126458	99397	106375	78659	33646	62669	52175
K01884	cysteinyl-tRNA synthetase, unknown class [EC:6.1.1.16]	0	0	0	0	0	0	50	4	3	3
K05395	cystine reductase [EC:1.8.1.6]	0	0	0	0	29	0	0	0	10	0
K10010	cystine transport system ATP-binding protein [EC:3.6.3.-]	83055	259	41395	209	5217	29859	112	1387	1009	226
K10009	cystine transport system permease protein	82768	32079	41373	78484	27235	29869	130	1278	920	241
K02424	cystine transport system substrate-binding protein	82757	257	44643	960	3846	32573	58	1187	843	207
K06203	CysZ protein	82934	46574	53110	87892	30705	31671	5051	8575	28607	36397
K01489	cytidine deaminase [EC:3.5.4.5]	1652	55123	29230	98575	45106	43283	42137	25266	54848	38605
K00945	cytidylate kinase [EC:2.7.4.14]	85189	140826	81005	123155	84414	76250	37659	26269	54872	39305
K02826	cytochrome aa3-600 menaquinol oxidase subunit II [EC:1.10.3.12];quinol oxidase polypeptide II [EC:1.9.3.-]	1	424	17	7	205	86	197	117	39	111
K02828	cytochrome aa3-600 menaquinol oxidase subunit III [EC:1.10.3.12];quinol oxidase polypeptide III [EC:1.9.3.-]	0	300	16	7	158	85	6	5	4	2
K02829	cytochrome aa3-600 menaquinol oxidase subunit IV [EC:1.10.3.12];quinol oxidase polypeptide IV [EC:1.9.3.-]	0	300	17	1	167	86	6	5	3	2
K12262	cytochrome b561	165735	272994	137483	288637	173199	89560	11549	17867	47487	62404
K02635	cytochrome b6	2	0	6	16	945	14	90	26	15	6
K02636	cytochrome b6-f complex iron-sulfur subunit [EC:1.10.99.1]	6	199	14	51	1678	29	2532	2072	1387	45
K02637	cytochrome b6-f complex subunit 4	2	0	6	16	945	14	90	24	12	6
K02640	cytochrome b6-f complex subunit 5	2	0	6	16	945	14	90	24	12	6
K02642	cytochrome b6-f complex subunit 6	0	0	0	0	0	0	4	4	1	0
K02643	cytochrome b6-f complex subunit 7	0	0	2	6	265	2	39	7	5	2
K03689	cytochrome b6-f complex subunit 8	2	0	6	16	942	14	46	14	8	3
K08738	cytochrome c	129	121146	39495	208144	68611	36874	18270	21558	36111	4534
K07399	cytochrome c biogenesis protein	204	80629	29093	13755	44062	32946	3428	3178	2813	202
K02199	cytochrome c biogenesis protein CcmG, thiol:disulfide interchange protein DsbE	82864	130404	54384	119683	48324	35042	11412	16750	42125	41346
K02258	cytochrome c oxidase assembly protein subunit 11;cytochrome c oxidase subunit XI assembly protein	82843	127194	55007	97430	69962	35392	8521	12637	32661	23495
K02259	cytochrome c oxidase assembly protein subunit 15;cytochrome c oxidase subunit XV assembly protein	82900	131646	75766	120101	87343	66779	13655	18854	41172	25374
K00407	cytochrome c oxidase cb-type subunit IV;cb-type cytochrome c oxidase subunit IV [EC:1.9.3.1]	82922	134483	87587	113750	75091	60164	44643	17725	37538	21290
K02266	cytochrome c oxidase subunit 6a	1	0	3447	6	50	2715	1	1	0	2
K02274	cytochrome c oxidase subunit I [EC:1.9.3.1]	83243	183582	78572	236951	136254	72144	22982	29927	54631	26376
K02275	cytochrome c oxidase subunit II [EC:1.9.3.1]	83264	259761	87699	231431	118894	71589	20308	26668	52560	24619
K02276	cytochrome c oxidase subunit III [EC:1.9.3.1]	83465	212003	81257	287142	137484	71570	20472	30191	71758	28958
K02277	cytochrome c oxidase subunit IV [EC:1.9.3.1]	190	425	43	12	96	106	22	449	324	444
K00428	cytochrome c peroxidase [EC:1.11.1.5]	730	116622	75165	119382	72892	40159	95832	43087	94241	68054
K13300	cytochrome c550	0	424	15	7	74	88	13	12	5	1
K12263	cytochrome c551	3	424	37	9	80	105	13	13	5	1
K03385	cytochrome c-552 [EC:1.7.2.2];formate-dependent nitrite reductase, periplasmic cytochrome c552 subunit [EC:1.7.2.2]	866	8755	750	738	1335	130	2854	3537	7898	20907
K08906	cytochrome c6	3	2	13	1104	2032	28	187	52	28	15
K06196	cytochrome c-type biogenesis protein	699	47846	18335	100732	34779	31970	34610	18873	25942	1496
K02197	cytochrome c-type biogenesis protein CcmE	83035	130410	65649	120756	50598	43445	9981	15346	36016	35910
K02198	cytochrome c-type biogenesis protein CcmF	82938	130413	54412	120786	50918	34959	11761	16707	41531	54499
K02200	cytochrome c-type biogenesis protein CcmH	165665	181363	90927	217434	115695	63914	19395	24540	54601	42500
K02568	cytochrome c-type protein NapB	76	7074	5017	1258	629	2807	42913	11041	20840	34207
K02569	cytochrome c-type protein NapC	82880	7326	5830	2392	17872	3121	8630	9223	22933	34545
K00425	cytochrome d ubiquinol oxidase subunit I [EC:1.10.3.-];cytochrome bd-I oxidase subunit I [EC:1.10.3.-]	83999	141481	113072	127678	88665	69356	50112	24639	57874	76654
K00426	cytochrome d ubiquinol oxidase subunit II [EC:1.10.3.-];cytochrome bd-I oxidase subunit II [EC:1.10.3.-]	83988	141472	112943	127652	88519	69099	50057	24520	57598	76393
K02300	cytochrome o ubiquinol oxidase operon protein cyoD	91	94992	52732	24455	19553	34542	3073	5426	10950	17056
K02298	cytochrome o ubiquinol oxidase subunit I [EC:1.10.3.-]	90	100428	52742	24826	19768	34617	3078	5431	10953	17058
K02297	cytochrome o ubiquinol oxidase subunit II [EC:1.10.3.-]	93	100850	52765	24477	19773	34631	3078	5431	10953	17058
K02299	cytochrome o ubiquinol oxidase subunit III [EC:1.10.3.-]	93	100974	52766	24826	19813	34632	3078	5431	10953	17058
K14338	cytochrome P450 / NADPH-cytochrome P450 reductase [EC:1.14.14.1 1.6.2.4]	10	872	356	2295	245	574	112	343	435	18
K14372	cytochrome P450 hydroxylase [EC:1.14.-.-]	0	0	47	2	1	370	0	0	1	0
K05917	cytochrome P450, family 51 (sterol 14-demethylase) [EC:1.14.13.70]	8	18	518	360	268	2402	19	189	41	8
K00326	cytochrome-b5 reductase [EC:1.6.2.2]	0	0	3	77	1854	0	1	0	2	1
K00437	cytochrome-c3 hydrogenase [EC:1.12.2.1]	0	8	0	41	20	0	9	11	16	2
K11013	cytolethal distending toxin subunit A	0	0	0	0	8	0	0	0	0	1
K11014	cytolethal distending toxin subunit B	0	0	0	0	8	0	0	0	0	1
K11015	cytolethal distending toxin subunit C	0	0	0	0	8	0	0	0	0	1
K07389	cytolysin-activating lysine-acyltransferase [EC:2.3.1.-]	7	223	2950	395	786	2150	3993	2407	4537	17559
K01485	cytosine deaminase [EC:3.5.4.1]	83277	200825	114582	267560	114745	83098	8679	11147	20696	23286
K10974	cytosine permease	134	197	51357	1198	2155	30752	1746	2596	6308	20561
K01263	cytosol alanyl aminopeptidase [EC:3.4.11.14]	20	91	4459	633	5160	1906	51	1789	11389	291
K11008	cytotoxic necrotizing factor 1	0	0	0	31	14	0	0	0	0	0
K00058	D-3-phosphoglycerate dehydrogenase [EC:1.1.1.95]	85667	246387	128096	187766	167090	92931	83683	46434	87116	60690
K00824	D-alanine transaminase [EC:2.6.1.21]	409	130860	12381	108624	57212	1882	6956	10850	26609	2773
K03740	D-alanine transfer protein	17	1010	2509	1510	697	9969	291	25	41	9
K01921	D-alanine-D-alanine ligase [EC:6.3.2.4]	85498	183900	105881	213428	130656	92726	111483	43228	71095	40368
K03367	D-alanine-poly(phosphoribitol) ligase [EC:6.1.1.13];D-alanine--poly(phosphoribitol) ligase subunit 1 [EC:6.1.1.13]	27	1143	2506	104	653	9941	1643	506	2317	26897
K14188	D-alanine--poly(phosphoribitol) ligase subunit 2 [EC:6.1.1.13]	17	145	2499	109	596	9923	291	25	41	8
K07258	D-alanyl-D-alanine carboxypeptidase (penicillin-binding protein 5/6) [EC:3.4.16.4]	84516	142826	73623	118406	93941	59423	94653	31605	57284	83243
K07259	D-alanyl-D-alanine carboxypeptidase / D-alanyl-D-alanine-endopeptidase (penicillin-binding protein 4) [EC:3.4.16.4 3.4.99.-];D-alanyl-D-alanine carboxypeptidase / D-alanyl-D-alanine-endopeptidase (penicillin-binding protein 4) [EC:3.4.16.4 3.4.21.-]	166819	178332	138583	38670	103840	127728	28406	37798	63170	71556
K01286	D-alanyl-D-alanine carboxypeptidase [EC:3.4.16.4]	380	191298	16073	428207	136410	15967	12664	17557	35545	16064
K07260	D-alanyl-D-alanine carboxypeptidase [EC:3.4.16.4]	690	3075	19664	2235	11693	38890	26726	10864	28818	36668
K01274	D-alanyl-D-alanine dipeptidase [EC:3.4.13.-]	8	147	15335	57	296	13728	12	8	10	10
K08641	D-alanyl-D-alanine dipeptidase [EC:3.4.13.22];D-alanyl-D-alanine dipeptidase [EC:3.4.13.-]	84	6936	17250	14756	15204	14597	3120	5776	9047	14373
K07262	D-alanyl-D-alanine endopeptidase (penicillin-binding protein 7) [EC:3.4.99.-];D-alanyl-D-alanine endopeptidase (penicillin-binding protein 7) [EC:3.4.21.-]	82817	79473	52927	14580	45637	31884	1179	2117	3218	12247
K10551	D-allose transport system ATP-binding protein [EC:3.6.3.17]	0	3	137	34	542	53	0	2	1	3
K10550	D-allose transport system permease protein	0	3	137	34	542	53	0	2	1	3
K10549	D-allose transport system substrate-binding protein	0	96	144	1645	1016	53	0	5	6	3
K00285	D-amino-acid dehydrogenase [EC:1.4.99.1]	165885	549882	158276	707617	322159	91222	47321	24349	57419	39221
K00273	D-amino-acid oxidase [EC:1.4.3.3]	2	18	93	1376	2157	689	98	26	49	10
K01266	D-aminopeptidase [EC:3.4.11.19]	200	121366	47575	101813	52382	28570	6591	7862	13230	822
K03112	DamX protein	82768	49	41564	199	3642	29990	3143	5443	20651	34328
K00007	D-arabinitol 4-dehydrogenase [EC:1.1.1.11]	1	143	235	790	952	72	361	295	588	1510
K00272	D-aspartate oxidase [EC:1.4.3.1]	0	0	0	1	0	0	0	1	0	0
K08310	dATP pyrophosphohydrolase [EC:3.6.1.-]	216	78488	12569	5778	38088	2269	1903	2314	3309	21697
K03272	D-beta-D-heptose 7-phosphate kinase / D-beta-D-heptose 1-phosphate adenosyltransferase [EC:2.7.1.- 2.7.7.-]	165933	9852	90160	25191	43438	57477	43715	19647	52925	57747
K09011	D-citramalate synthase [EC:2.3.1.182]	438	8648	652	293	1322	27	720	1258	535	56
K01493	dCMP deaminase [EC:3.5.4.12]	1790	9443	12924	5691	13815	10889	64007	15383	28784	37663
K01494	dCTP deaminase [EC:3.5.4.13]	82974	131321	73096	122165	85557	68454	12185	16504	32240	7523
K05396	D-cysteine desulfhydrase [EC:4.4.1.15]	82802	1132	41826	16872	13203	30107	3771	7872	13515	1123
K07341	death on curing protein	342	7537	25574	12821	22114	34343	1664	1401	3318	12037
K03749	DedD protein	82874	79490	47043	14552	44883	28315	39096	10871	26069	34913
K12202	defect in organelle trafficking protein DotA	0	0	0	0	0	0	2	0	4	0
K12203	defect in organelle trafficking protein DotB	0	0	0	10	1	0	8	145	100	2
K12204	defect in organelle trafficking protein DotC	0	0	0	10	1	0	8	145	100	2
K12205	defect in organelle trafficking protein DotD	0	0	0	0	0	0	4	128	39	1
K11163	dehydrogenase/reductase SDR family member 1 [EC:1.1.-.-]	0	0	0	464	0	0	0	0	3	0
K11168	dehydrogenase/reductase SDR family member 12 [EC:1.1.-.-]	0	0	0	0	0	0	0	0	2	0
K11441	dehydrogluconokinase [EC:2.7.1.13]	6	5	23576	44	462	17156	7	5	8	7
K11646	dehydroquinate synthase II [EC:1.4.1.-]	71	126	54	3	82	371	84	492	433	454
K10209	dehydrosqualene desaturase [EC:1.14.99.-]	7	68	770	5	177	506	62	23	52	13
K10208	dehydrosqualene synthase [EC:2.5.1.-]	0	0	16	1	141	86	0	1	2	1
K11784	de-hypoxanthine futalosine synthase [EC:1.21.-.-]	1	2	88	5	6	719	1	1	1	1
K08262	delta12-fatty acid dehydrogenase [EC:1.14.99.33]	0	0	0	2	132	0	0	2	1	0
K00222	delta14-sterol reductase [EC:1.3.1.70]	0	0	0	0	3	0	1	0	0	0
K00223	delta24(24(1))-sterol reductase [EC:1.3.1.71]	0	0	0	0	0	0	2	0	4	0
K11039	delta-hemolysin	0	0	0	0	19	62	0	1	2	1
K02081	DeoR family transcriptional regulator, aga operon transcriptional repressor	422	7316	4282	17207	8882	2366	5506	6449	11578	11525
K11534	DeoR family transcriptional regulator, deoxyribose operon repressor	17	7216	633	4695	3368	224	544	441	1074	5839
K03436	DeoR family transcriptional regulator, fructose operon transcriptional repressor	1187	1821	45261	806	8405	58844	2712	2423	1561	166
K02436	DeoR family transcriptional regulator, galactitol utilization operon repressor	2	3	138	35	1825	56	0	4	1	4
K02468	DeoR family transcriptional regulator, glucitol operon repressor	170	3	139	35	2134	54	9	8	10	7
K02444	DeoR family transcriptional regulator, glycerol-3-phosphate regulon repressor	83049	223654	54257	345287	128938	32543	12336	17185	47680	68701
K02530	DeoR family transcriptional regulator, lactose phosphotransferase system repressor	25	153	3948	14	304	3172	59	20	20	11
K02430	DeoR family transcriptional regulator, L-fucose operon activator	5	12	840	107	2879	318	1185	805	1687	8581
K06608	DeoR family transcriptional regulator, myo-inositol catabolism operon repressor	0	1	22	1	20	10	10	5	6	2
K09012	DeoR family transcriptional regulator, suf operon transcriptional repressor	0	0	2	6	268	2	76	10	6	2
K03477	DeoR family transcriptional regulator, ulaG and ulaABCDEF operon transcriptional repressor	32	47295	910	89518	29240	2483	2892	2231	5057	32234
K10353	deoxyadenosine kinase [EC:2.7.1.76]	0	0	15	7	15	12	7	8	1	1
K00904	deoxyguanosine kinase [EC:2.7.1.113]	63	180	4470	1988	18031	1812	2177	2209	12014	339
K00809	deoxyhypusine synthase [EC:2.5.1.46]	17	4099	1406	5330	6565	596	1818	3836	6702	1734
K01669	deoxyribodipyrimidine photo-lyase [EC:4.1.99.3]	166413	119949	77874	110973	105483	67953	58816	34152	94208	102410
K01161	deoxyribonuclease (pyrimidine dimer) [EC:3.1.25.1]	4	828	2	131	645	0	0	1	0	0
K01150	deoxyribonuclease I [EC:3.1.21.1]	82774	52	43143	272	3708	30583	3217	4828	10064	34264
K01151	deoxyribonuclease IV [EC:3.1.21.2]	1562	5603	9523	3345	9401	3468	44571	10964	15552	35032
K05982	deoxyribonuclease V [EC:3.1.21.7]	82905	874	2458	7822	5509	1935	332	1925	1755	489
K11995	deoxyribonuclease-1-like protein [EC:3.1.21.-]	0	0	0	0	0	0	0	0	2	0
K05346	deoxyribonucleoside regulator	34	8	2587	40	233	25951	14	12	7	11
K01619	deoxyribose-phosphate aldolase [EC:4.1.2.4]	2435	83483	42140	173306	66925	43742	38612	21388	36559	42084
K00859	dephospho-CoA kinase [EC:2.7.1.24]	84628	140864	82607	124124	96637	77102	73328	30741	59497	39005
K07589	D-erythro-7,8-dihydroneopterin triphosphate epimerase [EC:5.-.-.-]	82756	34	41126	172	3459	29856	168	227	969	76
K03472	D-erythrose 4-phosphate dehydrogenase [EC:1.2.1.72]	82778	58	41571	837	3704	30012	3137	3536	8966	34315
K01935	dethiobiotin synthetase [EC:6.3.3.3]	83838	127957	67062	108136	85140	64452	47109	21333	53060	38478
K06371	developmental checkpoint coupling sporulation initiation to replication initiation	0	0	15	6	69	87	12	12	3	1
K00689	dextransucrase [EC:2.4.1.5]	6	4	3	4	36	23465	21	40	50	7
K00035	D-galactose 1-dehydrogenase [EC:1.1.1.48]	10	15497	5173	8461	3561	4340	286	474	167	65
K03273	D-glycero-D-manno-heptose 1,7-bisphosphate phosphatase [EC:3.1.3.-]	83101	88860	65458	27602	51940	33171	6152	9500	25205	35303
K01129	dGTPase [EC:3.1.5.1]	84629	141635	92422	128058	91612	69585	74476	31568	62428	50922
K00901	diacylglycerol kinase [EC:2.7.1.107]	83779	131967	62243	112088	86913	42727	69634	24702	55691	60311
K00635	diacylglycerol O-acyltransferase [EC:2.3.1.20]	82772	128	1142	2540	1440	674	2541	2381	2127	80
K00657	diamine N-acetyltransferase [EC:2.3.1.57]	785	77673	25673	164577	55669	8444	9972	10200	28023	63943
K00836	diaminobutyrate-2-oxoglutarate transaminase [EC:2.6.1.76]	83031	9688	68337	17510	14816	50723	45356	16484	38293	51346
K11752	diaminohydroxyphosphoribosylaminopyrimidine deaminase / 5-amino-6-(5-phosphoribosylamino)uracil reductase [EC:3.5.4.26 1.1.1.193]	168460	285519	166098	248605	188261	140535	126196	59519	118526	78454
K01586	diaminopimelate decarboxylase [EC:4.1.1.20]	84896	141335	105335	126951	100523	99066	74538	33505	63177	54579
K03340	diaminopimelate dehydrogenase [EC:1.4.1.16]	712	8790	1519	87	2957	142	193	344	182	74
K01778	diaminopimelate epimerase [EC:5.1.1.7]	84150	141277	114295	118556	94454	93725	52885	28794	59036	39296
K01751	diaminopropionate ammonia-lyase [EC:4.3.1.15]	253	33599	3644	85172	45096	1606	7614	9463	18860	2884
K08762	diazepam-binding inhibitor (GABA receptor modulator, acyl-CoA-binding protein)	0	0	24	0	2	4	0	0	1	0
K03309	dicarboxylate/amino acid:cation (Na+ or H+) symporter, DAACS family	11	1990	26553	6190	7527	19532	115	1253	374	27
K13590	diguanylate cyclase	248303	39512	66581	96007	81656	51669	4573	10564	26485	35147
K13069	diguanylate cyclase [EC:2.7.7.65]	19	3854	330	2076	2922	157	43	122	456	278
K12239	dihydroaeruginoic acid synthetase	4	3	13776	24	158	10712	4	1	5	4
K00078	dihydrodiol dehydrogenase / D-xylose 1-dehydrogenase (NADP) [EC:1.3.1.20 1.1.1.179]	1	0	2	1	187	0	1	1	4	5
K00215	dihydrodipicolinate reductase [EC:1.3.1.26]	84759	174804	82826	203885	123258	77133	78306	33607	62768	39571
K01714	dihydrodipicolinate synthase [EC:4.2.1.52]	86070	601938	214690	758965	369408	186044	91961	52830	107746	64952
K00091	dihydroflavonol-4-reductase [EC:1.1.1.219]	25	6294	10874	12344	7008	9193	858	1491	1711	1606
K00287	dihydrofolate reductase [EC:1.5.1.3]	84022	140592	81884	117661	93625	76007	34022	22472	53822	50063
K11754	dihydrofolate synthase / folylpolyglutamate synthase [EC:6.3.2.12 6.3.2.17]	169442	282298	159373	262416	196618	168021	149228	63073	120406	79015
K00382	dihydrolipoamide dehydrogenase [EC:1.8.1.4]	168961	470840	226246	511569	278434	197727	103363	65330	128411	71500
K13938	dihydromonapterin reductase / dihydrofolate reductase [EC:1.5.1.- 1.5.1.3]	82781	60	75365	391	4774	55879	471	4657	15763	1037
K13940	dihydroneopterin aldolase / 2-amino-4-hydroxy-6-hydroxymethyldihydropteridine diphosphokinase [EC:4.1.2.25 2.7.6.3]	346	190	371	242	565	3106	97	50	45	18
K01633	dihydroneopterin aldolase [EC:4.1.2.25]	83835	138693	83180	123066	94982	78330	51837	26487	57390	38732
K01465	dihydroorotase [EC:3.5.2.3]	167707	305900	172741	323416	206200	137282	117956	50590	99284	57596
K00254	dihydroorotate dehydrogenase [EC:1.3.5.2]	0	1	0	67	34	0	29	189	5	3
K02823	dihydroorotate dehydrogenase electron transfer subunit	1282	9099	7751	2022	5829	11315	24288	8055	4663	1262
K00226	dihydroorotate oxidase [EC:1.3.3.1];dihydroorotate dehydrogenase (fumarate) [EC:1.3.98.1]	86037	149946	105795	126300	103819	90053	76188	35429	74283	40841
K00796	dihydropteroate synthase [EC:2.5.1.15]	84087	138745	78299	124082	96291	76909	56291	30905	62449	51185
K01464	dihydropyrimidinase [EC:3.5.2.2]	431	78369	55185	181663	78239	32832	4703	6797	12453	1319
K00207	dihydropyrimidine dehydrogenase (NADP+) [EC:1.3.1.2]	45	43319	36803	83723	27442	27156	1332	1403	1180	784
K00863	dihydroxyacetone kinase [EC:2.7.1.29]	43	52771	14711	88764	29357	5184	586	446	695	281
K05879	dihydroxyacetone kinase, C-terminal domain [EC:2.7.1.-]	578	27655	22078	15453	24650	15492	3070	3315	4102	705
K05878	dihydroxyacetone kinase, N-terminal domain [EC:2.7.1.-]	576	27281	22082	16594	24785	15496	3072	3312	4101	706
K01687	dihydroxy-acid dehydratase [EC:4.2.1.9]	84919	383302	127770	278372	186714	107083	79252	36434	68570	46851
K00485	dimethylaniline monooxygenase (N-oxide forming) [EC:1.14.13.8]	82783	64744	12529	163196	51109	9810	5228	5822	9858	736
K01482	dimethylargininase [EC:3.5.3.18]	103	41070	11729	81238	25315	1959	2186	3346	9038	135
K00315	dimethylglycine dehydrogenase [EC:1.5.99.2]	64	81462	630	177164	57352	258	21950	26671	61124	3922
K13042	dimethylglycine N-methyltransferase [EC:2.1.1.161]	0	0	0	2	132	2	12	170	138	4
K08659	dipeptidase A [EC:3.4.-.-];dipeptidase [EC:3.4.-.-]	63	72	777	37	1070	8054	10	19	23	3
K05995	dipeptidase E [EC:3.4.13.21]	388	4687	18842	3692	7021	3482	3827	6676	28448	3324
K12372	dipeptide transport system ATP-binding protein	41	44156	41441	85263	44718	29804	2898	4608	14008	575
K12371	dipeptide transport system ATP-binding protein	61	74599	41643	161537	69392	29822	784	3825	12805	631
K12370	dipeptide transport system permease protein	41	44156	41440	85263	44688	29804	594	3452	12584	566
K12369	dipeptide transport system permease protein	54	43292	52715	82096	44297	31565	638	3529	13462	584
K12368	dipeptide transport system substrate-binding protein	57	77225	50028	171004	74831	36071	682	3548	12671	611
K01282	dipeptidyl aminopeptidase [EC:3.4.14.-]	0	0	18	0	0	7	0	0	0	0
K01278	dipeptidyl-peptidase 4 [EC:3.4.14.5]	1355	22294	10531	9518	18351	4489	8195	13227	39775	4463
K01277	dipeptidyl-peptidase III [EC:3.4.14.4]	685	8658	4469	311	1416	35	3068	2564	15022	2851
K01597	diphosphomevalonate decarboxylase [EC:4.1.1.33]	272	293	7145	1516	2772	10298	3404	4806	15661	2893
K06410	dipicolinate synthase subunit A	266	32371	750	79817	24697	117	728	489	269	83
K06411	dipicolinate synthase subunit B	330	547	485	70	1225	107	621	387	166	47
K03611	disulfide bond formation protein DsbB	82901	80208	86382	25078	51389	57803	39232	12630	32700	35124
K03319	divalent anion:Na+ symporter, DASS family	64	359	4746	630	18386	26329	3451	3861	3420	7329
K04036	divinyl protochlorophyllide a 8-vinyl-reductase [EC:1.-.-.-]	8	11	131	3844	1552	8	166	312	221	45
K00102	D-lactate dehydrogenase (cytochrome) [EC:1.1.2.4]	244	118020	35027	111305	53631	20813	6295	8752	14402	1240
K03777	D-lactate dehydrogenase [EC:1.1.1.28]	31	2296	2300	1617	25350	3806	1129	1504	4417	14234
K03778	D-lactate dehydrogenase [EC:1.1.1.28]	83089	4919	43853	5187	11226	30615	4145	4883	10025	34261
K02071	D-methionine transport system ATP-binding protein	83743	131484	114686	104243	72057	103702	24597	7636	11335	34842
K02072	D-methionine transport system permease protein	83782	132320	127888	104456	72780	113481	26632	7729	11428	34875
K02073	D-methionine transport system substrate-binding protein	83836	218021	194038	126305	115694	155768	25129	9192	15022	36593
K00558	DNA (cytosine-5-)-methyltransferase [EC:2.1.1.37]	84659	168871	59002	206214	127851	33802	96719	31609	57651	18011
K06223	DNA adenine methylase [EC:2.1.1.72]	942	8549	10661	4753	34382	8476	45131	15380	31342	35068
K10979	DNA end-binding protein Ku	82955	153701	52770	117629	57450	25678	4134	4671	3466	503
K10844	DNA excision repair protein ERCC-2 [EC:3.6.4.12];DNA excision repair protein ERCC-2 [EC:3.6.1.-]	1	132	817	15	1120	905	99	557	430	6
K10843	DNA excision repair protein ERCC-3 [EC:3.6.4.12];DNA excision repair protein ERCC-3 [EC:3.6.1.-]	226	1086	14949	757	2959	4883	186	406	299	64
K10848	DNA excision repair protein ERCC-4 [EC:3.1.-.-]	1	2	6354	15	253	3730	2	2	4	1
K01249	DNA glycosylase [EC:3.2.2.-]	4	6655	124	897	552	19	355	877	3083	58
K07470	DNA gyrase inhibitor	2	3	138	35	1928	56	1	5	2	4
K02469	DNA gyrase subunit A [EC:5.99.1.3]	84911	141652	100414	124869	101245	106150	78226	33735	61505	39642
K02470	DNA gyrase subunit B [EC:5.99.1.3]	84912	141653	100486	124861	100307	107824	78114	33643	61557	39656
K03657	DNA helicase II / ATP-dependent DNA helicase PcrA [EC:3.6.4.12];DNA helicase II / ATP-dependent DNA helicase PcrA [EC:3.6.1.-]	168872	300557	141318	317351	172543	147094	137508	47744	74763	40851
K03658	DNA helicase IV [EC:3.6.1.-];DNA helicase IV [EC:3.6.4.12]	22	15	573	64	2643	187	3966	3489	8059	33914
K07067	DNA integrity scanning protein	175	609	6254	359	1684	29506	3154	2522	2121	101
K01971	DNA ligase (ATP) [EC:6.5.1.1]	165969	182937	109692	157776	96191	65284	51438	20788	35294	36710
K01972	DNA ligase (NAD+) [EC:6.5.1.2]	167500	140922	118232	124362	101104	103561	75647	31469	60468	39813
K10747	DNA ligase 1 [EC:6.5.1.1]	0	0	0	0	0	0	10	29	22	4
K07458	DNA mismatch endonuclease, patch repair protein [EC:3.1.-.-]	330	43360	13453	87451	29637	2911	5258	6240	3916	213
K03573	DNA mismatch repair protein MutH	184	16	574	52	3537	188	3060	4020	19766	34137
K03572	DNA mismatch repair protein MutL	84611	140037	64376	125020	95587	46014	35058	24052	54292	39145
K03555	DNA mismatch repair protein MutS	84657	140267	65254	125058	96075	46290	69078	27037	57102	39296
K07456	DNA mismatch repair protein MutS2	1788	9731	9408	12281	14194	10464	61119	15489	22503	3917
K02347	DNA polymerase (family X)	110	105	440	8830	1919	624	4988	5518	3377	100
K02334	DNA polymerase bacteriophage-type [EC:2.7.7.7]	920	178338	21130	210044	111969	11305	48189	20159	26888	1508
K02330	DNA polymerase beta subunit [EC:2.7.7.7 4.2.99.-]	0	6	0	314	74	0	5	56	20	0
K02319	DNA polymerase I [EC:2.7.7.7]	1	0	1	2	54	236	24	22	24	0
K02335	DNA polymerase I [EC:2.7.7.7]	84759	141170	97126	124559	98679	105327	75607	31401	60121	39548
K02336	DNA polymerase II [EC:2.7.7.7]	82768	62	41702	198	3678	30006	3233	4800	9935	34081
K02337	DNA polymerase III subunit alpha [EC:2.7.7.7]	85186	141545	87073	126380	103976	78699	81235	35659	77043	42401
K03763	DNA polymerase III subunit alpha, Gram-positive type [EC:2.7.7.7]	564	777	4100	168	4785	10387	23522	3859	1669	358
K02338	DNA polymerase III subunit beta [EC:2.7.7.7]	84735	143319	83058	124556	97845	69903	75879	31532	60320	39518
K02339	DNA polymerase III subunit chi [EC:2.7.7.7]	82993	130452	55869	110876	80842	35704	9637	13257	35119	35461
K02340	DNA polymerase III subunit delta [EC:2.7.7.7]	84638	140745	82873	124136	97485	76862	75473	31097	60039	39502
K02341	DNA polymerase III subunit delta' [EC:2.7.7.7]	84508	140865	83003	124144	96170	76868	75396	29819	59710	39477
K02342	DNA polymerase III subunit epsilon [EC:2.7.7.7]	333613	280110	205203	234365	180898	172864	214229	73467	154756	197478
K02343	DNA polymerase III subunit gamma/tau [EC:2.7.7.7]	84932	140865	82997	124148	97792	77011	75395	31174	59949	39460
K02344	DNA polymerase III subunit psi [EC:2.7.7.7]	12	15	571	47	2059	186	3034	2146	7423	33834
K02345	DNA polymerase III subunit theta [EC:2.7.7.7]	2	4	562	37	2049	175	1	5	3	5
K02346	DNA polymerase IV [EC:2.7.7.7]	85011	183201	82827	208442	126664	78147	77564	33512	66762	41260
K03502	DNA polymerase V	83141	563	34288	1479	27099	29980	3277	6459	22457	15065
K03503	DNA polymerase V [EC:3.4.21.-]	82912	552	31259	4366	56496	21621	3262	6343	22533	15289
K02316	DNA primase [EC:2.7.7.-]	84730	140866	83028	124150	97389	77105	75059	30762	57058	39491
K04096	DNA processing protein	84925	140869	81810	124100	98184	77181	72920	29999	59804	39455
K09760	DNA recombination protein RmuC	83863	139656	78645	111957	89737	74433	54260	27159	57539	38507
K04485	DNA repair protein RadA/Sms	84623	140865	82619	123015	96593	77111	71042	29154	58661	39438
K03630	DNA repair protein RadC	84629	141505	81161	127039	102487	58768	41028	29074	65306	74524
K03631	DNA repair protein RecN (Recombination protein N)	84698	140866	82611	123437	96566	77105	73472	31213	59930	39471
K03584	DNA repair protein RecO (recombination protein O)	84603	140853	82135	124116	97444	76842	39638	24943	55491	39252
K03629	DNA replication and repair protein RecF	84526	61431	69970	108727	54588	74836	37363	25201	54229	38700
K02086	DNA replication protein	24	511	3291	25	714	10366	20	18	39	8
K02315	DNA replication protein DnaC	560	409	5328	2714	6428	2696	21180	3749	2093	360
K02317	DNA replication protein DnaT	2	3	138	35	1873	56	1	5	2	4
K10748	DNA replication terminus site-binding protein	3	5	6916	50	2292	3905	5	8	86	8
K03466	DNA segregation ATPase FtsK/SpoIIIE, S-DNA-T family	84609	187298	103167	208808	122225	114276	75569	32344	61292	39596
K03168	DNA topoisomerase I [EC:5.99.1.2]	167482	113607	104420	201141	105976	99523	78077	34324	67545	41520
K03169	DNA topoisomerase III [EC:5.99.1.2]	84502	100545	63751	23311	39617	34005	26495	10911	21592	36368
K03166	DNA topoisomerase VI subunit A [EC:5.99.1.3]	0	0	0	29	0	0	0	0	0	0
K03167	DNA topoisomerase VI subunit B [EC:5.99.1.3]	0	0	0	29	0	0	0	0	0	0
K07343	DNA transformation protein and related proteins	479	44396	41698	86340	47426	29834	8341	9593	21674	67853
K01741	DNA-(apurinic or apyrimidinic site) lyase [EC:4.2.99.18]	0	2	0	8	124	0	0	0	0	0
K03652	DNA-3-methyladenine glycosylase [EC:3.2.2.21]	271	11242	62088	32674	16679	62661	3260	5007	3204	353
K01246	DNA-3-methyladenine glycosylase I [EC:3.2.2.20]	83799	141442	81992	113601	85672	100822	15884	21363	53671	38966
K01247	DNA-3-methyladenine glycosylase II [EC:3.2.2.21]	83054	129159	74426	121895	83937	50188	7047	9255	15432	6928
K12961	DnaA initiator-associating protein	14	16	573	51	2074	187	3084	4029	19773	34139
K10763	DnaA-homolog protein	82828	79737	53381	15159	50993	32259	330	3820	14448	853
K03746	DNA-binding protein H-NS	134	159150	25380	22337	78973	5351	9712	9490	22344	36197
K05787	DNA-binding protein HU-alpha	82777	58	41569	198	3698	30012	3382	3731	9775	34330
K03530	DNA-binding protein HU-beta	86070	241977	136025	143187	129595	106908	82081	38430	78466	43434
K11685	DNA-binding protein StpA	2	3	138	35	1849	56	1	4	2	4
K14623	DNA-damage-inducible protein D	204	3	42	608	1770	6	56	165	133	10
K12149	DNA-damage-inducible protein I	2	4	563	37	2026	175	1	6	4	7
K07473	DNA-damage-inducible protein J	83304	12650	6229	7188	6761	2683	24927	6770	6290	12488
K00960	DNA-directed RNA polymerase [EC:2.7.7.6]	0	0	0	0	15	0	84	105	791	20
K03040	DNA-directed RNA polymerase subunit alpha [EC:2.7.7.6]	84736	140867	83058	124156	97718	77475	75537	31358	60145	39511
K03043	DNA-directed RNA polymerase subunit beta [EC:2.7.7.6]	84647	140861	83002	124149	97679	77100	75006	31082	58867	25193
K03046	DNA-directed RNA polymerase subunit beta' [EC:2.7.7.6]	84729	140867	83014	124170	98656	77119	75630	31492	60184	39518
K13797	DNA-directed RNA polymerase subunit beta-beta' [EC:2.7.7.6]	6	0	3	0	2	0	0	0	0	0
K03048	DNA-directed RNA polymerase subunit delta [EC:2.7.7.6];DNA-directed RNA polymerase subunit delta	61	511	3669	34	1383	10366	2069	121	125	40
K03060	DNA-directed RNA polymerase subunit omega [EC:2.7.7.6]	83707	131918	78050	118724	87879	76824	69797	24862	43795	36572
K10908	DNA-directed RNA polymerase, mitochondrial [EC:2.7.7.6]	1	0	0	651	1	0	0	0	0	0
K09539	DnaJ homolog subfamily C member 19	0	0	0	0	2	0	0	0	0	0
K05801	DnaJ like chaperone protein	83441	52384	42941	92668	37571	30082	45767	19867	44670	37385
K06204	DnaK suppressor protein	166171	130650	120166	116405	87731	81380	56327	34652	68159	38507
K00721	dolichol-phosphate mannosyltransferase [EC:2.4.1.83]	1444	24941	39452	36366	29605	40831	11002	14999	29054	5301
K07151	dolichyl-diphosphooligosaccharide--protein glycosyltransferase [EC:2.4.1.119]	112	2	856	4	99	239	2117	2559	1981	541
K00729	dolichyl-phosphate beta-glucosyltransferase [EC:2.4.1.117]	117	0	75	29	42	645	39	234	46	6
K10253	DOPA 4,5-dioxygenase [EC:1.14.99.-]	30	1103	39773	4664	2278	31457	4973	5296	13620	35726
K10793	D-proline reductase (dithiol) PrdA [EC:1.21.4.1]	30	131	222	45	2649	13	20786	3009	1247	173
K10794	D-proline reductase (dithiol) PrdB [EC:1.21.4.1]	2	106	1	0	1067	4	45	277	13	4
K10795	D-proline reductase (dithiol) PrdD [EC:1.21.4.1]	1	113	0	40	4	0	88	301	40	11
K10796	D-proline reductase (dithiol) PrdE [EC:1.21.4.1]	2	106	1	80	1048	1	94	310	51	12
K06726	D-ribose pyranase [EC:5.-.-.-]	41	86	45663	158	4276	31566	3173	3531	9008	34077
K00875	D-ribulokinase [EC:2.7.1.47]	8	1079	42	1329	1642	8	36	35	40	15
K02352	drp35	1	1	2959	7	184	2225	1	1	2	2
K03298	drug/metabolite transporter, DME family	82832	78786	35034	5549	23069	19252	23125	7693	19040	22614
K01753	D-serine dehydratase [EC:4.3.1.18]	73	80951	18616	7753	23409	31173	2774	2092	7372	26519
K13629	D-serine transporter	1	3	3585	41	696	2768	41	60	12	8
K11737	D-serine/D-alanine/glycine transporter	33	5566	12674	1583	7947	30576	56	36	122	48
K13816	DSF synthase	9	591	292	2258	9169	796	1870	2083	1486	19
K08261	D-sorbitol dehydrogenase (acceptor) [EC:1.1.99.21]	41	43159	14966	83894	27757	8692	3106	2420	2152	727
K01790	dTDP-4-dehydrorhamnose 3,5-epimerase [EC:5.1.3.13]	84724	159869	99258	130365	96177	90878	48728	22779	36124	12634
K00067	dTDP-4-dehydrorhamnose reductase [EC:1.1.1.133]	249914	140227	102787	120092	95814	99430	14915	25338	48269	15937
K13318	dTDP-4-keto-6-deoxy-L-hexose 4-reductase	0	0	11	1	0	95	0	0	0	0
K04341	dTDP-dihydrostreptose-streptidine-6-phosphate dihydrostreptosyltransferase [EC:2.4.2.27]	0	0	2	0	0	7	0	0	0	0
K01710	dTDP-glucose 4,6-dehydratase [EC:4.2.1.46]	86228	323235	121352	318967	175205	113423	60683	35875	62806	30792
K14375	dTDP-L-oleandrosyltransferase [EC:2.4.1.-]	0	0	47	2	1	370	0	0	1	0
K00064	D-threo-aldose 1-dehydrogenase [EC:1.1.1.122]	42	26920	31387	19002	7216	19964	3407	4734	5356	721
K00943	dTMP kinase [EC:2.7.4.9]	84109	132428	80171	121622	92431	78995	73720	26458	43649	24055
K11924	DtxR family transcriptional regulator, manganese transport regulator	23	1869	327	8961	5785	312	844	1703	2368	429
K03709	DtxR family transcriptional regulator, Mn-dependent transcriptional regulator	985	5704	44454	13566	11182	97179	6478	10043	18923	3087
K07560	D-tyrosyl-tRNA(Tyr) deacylase [EC:3.1.-.-]	84593	88505	67794	17218	43842	72066	37110	24858	55126	39058
K14165	dual specificity phosphatase [EC:3.1.3.16 3.1.3.48]	3	255	665	502	16493	38	27	15	61	21
K01520	dUTP pyrophosphatase [EC:3.6.1.23]	84656	139649	81698	118140	95032	76737	33834	20637	36009	5075
K14274	D-xylonolactonase	0	0	0	0	114	0	0	0	0	0
K10545	D-xylose transport system ATP-binding protein [EC:3.6.3.17]	34	43847	20823	91528	30253	14455	4200	3500	6440	547
K10544	D-xylose transport system permease protein	39	43868	20872	91553	30524	14799	6889	5469	7941	624
K10543	D-xylose transport system substrate-binding protein	453	48217	20962	91587	32613	15199	7378	5861	8560	689
K05351	D-xylulose reductase [EC:1.1.1.9]	3	6847	34	5054	1606	18	401	405	185	36
K14086	ech hydrogenase subunit A	0	0	805	1	3	0	160	90	118	16
K14087	ech hydrogenase subunit B	3	1	806	2	3	1	166	511	418	458
K14088	ech hydrogenase subunit C	2	1	1	0	3	1	78	445	316	453
K14089	ech hydrogenase subunit D	2	1	1	0	24	6	79	446	316	453
K14090	ech hydrogenase subunit E	2	0	806	1	25	6	161	92	119	17
K14091	ech hydrogenase subunit F	2	1	1	0	1	1	78	445	316	453
K08276	ecotin	25	4542	31258	154	2547	23871	2361	2130	2488	12606
K10674	ectoine hydroxylase [EC:1.14.11.-]	82768	1171	1496	11671	7900	1698	36176	5195	5886	583
K13461	effector protein HopM1	6	2	792	46	42	529	2	2	34	2
K02348	ElaA protein	80	39830	45421	83080	50379	34600	6153	10111	28662	36180
K05594	ElaB protein	2	0	1	1	1359	3	1	3	2	2
K03522	electron transfer flavoprotein alpha subunit	167461	154319	115362	140437	130646	98111	92200	35016	71667	15025
K03521	electron transfer flavoprotein beta subunit	167464	154168	115378	139271	131186	98123	93099	35940	71226	27858
K00313	electron transfer flavoprotein-quinone oxidoreductase [EC:1.5.5.-]	109	8328	830	13277	3052	216	550	325	156	41
K03617	electron transport complex protein RnfA	84228	4660	37846	2096	26779	26522	25575	12500	24995	36919
K03616	electron transport complex protein RnfB	83028	79849	54586	15989	52452	32444	3780	6951	22799	36638
K03615	electron transport complex protein RnfC	84214	9001	5712	2002	26222	1526	25510	11233	23940	36485
K03614	electron transport complex protein RnfD	84159	9040	38573	2098	26744	26848	25575	12502	24995	36920
K03613	electron transport complex protein RnfE	84228	4660	37846	2096	26653	26523	25540	12456	25104	36918
K03612	electron transport complex protein RnfG	84129	4660	37584	2096	26653	26522	25577	12512	25097	36918
K05796	electron transport protein HydN	251	110	566	196	4196	178	160	751	370	462
K00311	electron-transferring-flavoprotein dehydrogenase [EC:1.5.5.1]	82882	136633	57427	112882	95332	36263	8998	12569	33418	23289
K03231	elongation factor EF-1 alpha subunit [EC:3.6.5.3];elongation factor 1-alpha	1	0	1	2	18	236	24	14	2	0
K02355	elongation factor EF-G [EC:3.6.5.3];elongation factor G	86680	270381	99583	221813	159073	85098	110461	49609	88653	94643
K02357	elongation factor EF-Ts;elongation factor Ts	84736	140866	83011	124154	97706	77105	75510	31335	60053	39505
K02358	elongation factor EF-Tu [EC:3.6.5.3];elongation factor Tu	168073	264497	122648	234420	177830	99624	103909	41818	77193	59612
K02356	elongation factor P;elongation factor EF-P	84953	142300	83655	130812	108037	77547	78841	35926	80574	73684
K07739	elongator complex protein 3 [EC:2.3.1.48]	0	0	1	0	5	0	4	10	12	0
K01180	endo-1,3(4)-beta-glucanase [EC:3.2.1.6]	0	0	0	0	0	0	4	3	0	0
K01181	endo-1,4-beta-xylanase [EC:3.2.1.8]	986	28858	891	10305	14435	3038	913	1585	843	153
K01179	endoglucanase [EC:3.2.1.4]	84258	14286	28763	30782	32375	13007	29284	18269	23005	16469
K01173	endonuclease [EC:3.1.30.-];endonuclease G, mitochondrial	21	28	7293	3175	18874	12531	791	1036	1462	5620
K10773	endonuclease III [EC:4.2.99.18]	84891	140921	71614	129522	98189	76168	73552	32793	59866	39546
K07457	endonuclease III related protein	240	7	896	17	328	1140	3011	3246	2859	587
K05522	endonuclease VIII [EC:3.2.2.- 4.2.99.18]	82885	3123	71680	6672	15699	71464	7893	6774	5761	697
K01415	endothelin-converting enzyme [EC:3.4.24.71]	4	70	115	2891	212	149	282	2212	11839	330
K14109	energy-converting hydrogenase A subunit R	0	0	0	0	4	0	5	23	18	0
K06862	energy-converting hydrogenase B subunit Q	0	0	0	0	22	0	0	0	0	0
K01689	enolase [EC:4.2.1.11]	84743	141215	83175	124243	97863	77313	77772	34777	62802	41209
K09880	enolase-phosphatase E1 [EC:3.1.3.77]	26	590	27821	3247	8903	14202	179	1591	1682	316
K11611	enoyl ACP reductase [EC:1.3.1.9]	3	8	5	140	30	6	8	12	27	1
K14628	enoyl reductase	0	0	1	0	0	11	0	0	0	0
K14629	enoyl reductase	0	0	0	0	0	9	0	0	0	0
K02371	enoyl-[acyl carrier protein] reductase II [EC:1.3.1.-]	1290	13597	10518	10474	12785	14385	25030	9862	18373	3168
K10780	enoyl-[acyl carrier protein] reductase III [EC:1.3.1.-]	0	423	15	5	51	88	2435	1969	1347	37
K00208	enoyl-[acyl-carrier protein] reductase I [EC:1.3.1.9]	83858	187191	62244	220104	114246	35239	53435	26531	42983	5686
K00209	enoyl-[acyl-carrier-protein] reductase (NADPH2, B-specific) [EC:1.3.1.10]	0	0	0	0	8	0	0	0	0	0
K13767	enoyl-CoA hydratase [EC:4.2.1.17]	0	424	15	7	83	91	13	12	3	1
K01692	enoyl-CoA hydratase [EC:4.2.1.17]	663825	1310040	554735	1113833	702368	418963	119580	134369	237993	86703
K02363	enterobactin 2,3-dihydroxybenzoate-AMP ligase / S-dihydroxybenzoyltransferase [EC:2.7.7.58 2.3.1.-]	24	3625	728	1019	5737	258	113	3030	12511	679
K01252	enterobactin isochorismatase [EC:3.3.2.1]	20	1054	4199	3220	2696	2971	934	1617	2325	14276
K02362	enterobactin synthetase component D [EC:2.7.8.-]	82766	968	44315	714	3796	32363	2396	2538	5243	32273
K02364	enterobactin synthetase component F [EC:2.7.7.-]	21	1199	231	1430	9143	302	915	1646	2278	14278
K07214	enterochelin esterase and related enzymes	420	17290	1104	9849	4756	822	522	1945	1442	258
K11058	enterotoxin Cpe	0	0	0	0	0	0	2	0	0	0
K12645	epi-isozizaene 5-monooxygenase [EC:1.14.13.106]	0	0	11	1	1	64	0	0	0	0
K10156	epi-isozizaene synthase [EC:4.2.3.37]	0	0	11	1	1	64	0	0	0	0
K14162	error-prone DNA polymerase [EC:2.7.7.7]	82996	162513	71867	190805	86992	65292	8848	11594	21243	23004
K00862	erythritol kinase [EC:2.7.1.27]	5	11199	32	8067	2579	4	20	52	63	21
K14370	erythromycin B/D C-12 hydroxylase [EC:1.14.-.-]	0	0	0	0	1	0	0	0	0	0
K03473	erythronate-4-phosphate dehydrogenase [EC:1.1.1.290]	83226	8715	38764	323	4987	27309	3488	6847	21831	34638
K10817	erythronolide synthase [EC:2.3.1.94]	0	1	50	3	7	397	4	2	13	4
K01066	esterase / lipase [EC:3.1.1.-]	165636	150694	135180	172800	77102	86572	3934	8249	13448	1105
K11750	esterase FrsA [EC:3.1.-.-]	12	15	571	47	2065	186	3034	2145	7500	33835
K00044	estradiol 17beta-dehydrogenase [EC:1.1.1.62]	3	30	0	270	12	4	2	6	24	0
K03735	ethanolamine ammonia-lyase large subunit [EC:4.3.1.7]	83016	2346	45536	7363	21643	32188	57312	10133	9072	2385
K03736	ethanolamine ammonia-lyase small subunit [EC:4.3.1.7]	82935	80430	55451	6718	22456	33281	57236	9985	8992	2379
K04023	ethanolamine transporter	143	695	16741	119	2547	11909	20893	3381	1338	341
K04032	ethanolamine utilization cobalamin adenosyltransferase [EC:2.5.1.17]	33	119	361	80	2169	66	20769	3171	1258	171
K04019	ethanolamine utilization protein EutA	48	562	16335	149	2368	11748	20773	3179	1263	176
K04024	ethanolamine utilization protein EutJ	376	268	785	92	1955	136	21251	3952	2164	2133
K04025	ethanolamine utilization protein EutK	0	3	137	35	540	53	0	2	0	3
K04026	ethanolamine utilization protein EutL	69	559	2830	97	2220	1196	20770	3178	1262	172
K04027	ethanolamine utilization protein EutM	15	428	2612	81	712	1186	221	1716	1237	461
K04028	ethanolamine utilization protein EutN	83127	816	3990	1264	4749	1715	22718	10414	8317	783
K04029	ethanolamine utilization protein EutP	409	686	3104	194	2960	1251	20903	3764	1596	676
K04030	ethanolamine utilization protein EutQ	46	471	2830	109	2224	1198	21194	3521	1831	1686
K04031	ethanolamine utilization protein EutS	384	786	3103	194	2988	1251	20930	4043	1608	678
K14748	ethylbenzene dioxygenase alpha subunit [EC:1.14.12.-]	6	92	525	379	525	2403	12	185	15	7
K14749	ethylbenzene dioxygenase beta subunit [EC:1.14.12.-]	11	224	1087	600	828	5169	23	363	29	14
K14750	ethylbenzene dioxygenase ferredoxin component	6	204	527	380	593	2403	13	186	15	7
K10700	ethylbenzene hydroxylase [EC:1.17.99.2]	0	0	0	640	60	0	0	0	0	0
K14447	ethylmalonyl-CoA mutase	16	996	252	6148	2620	574	8334	8452	13932	735
K12111	evolved beta-galactosidase subunit alpha [EC:3.2.1.23]	20	12	2634	49	536	1133	1614	874	4565	20310
K12112	evolved beta-galactosidase subunit beta	7	11	142	43	473	61	1613	873	4565	20310
K03701	excinuclease ABC subunit A	85494	229203	134842	144361	130105	131971	79307	39130	77648	42663
K03702	excinuclease ABC subunit B	84736	140866	83011	124154	97724	77105	75536	31352	60078	39508
K03703	excinuclease ABC subunit C	84732	140967	83044	124150	98803	77198	75140	31540	59177	26961
K05984	excinuclease Cho [EC:3.1.25.-]	3	6	140	38	1939	278	3	10	12	5
K11041	exfoliative toxin A/B	19	217	3203	52	279	9142	50	292	39	7
K01143	exodeoxyribonuclease (lambda-induced) [EC:3.1.11.3]	0	420	3	1474	242	0	1	1	0	1
K01141	exodeoxyribonuclease I [EC:3.1.11.1]	82987	32515	43607	82100	51582	31240	3420	4477	10467	34394
K01142	exodeoxyribonuclease III [EC:3.1.11.2]	167559	317845	161531	318897	200825	151620	79730	41592	76181	40994
K01144	exodeoxyribonuclease V [EC:3.1.11.5]	865	55377	6050	93750	69152	85	9508	11342	28466	3633
K03581	exodeoxyribonuclease V alpha subunit [EC:3.1.11.5]	83622	2573	50295	10712	18061	42013	65016	16917	24669	48429
K03582	exodeoxyribonuclease V beta subunit [EC:3.1.11.5]	82921	513	45848	2436	10395	30891	39191	9252	15122	34628
K03583	exodeoxyribonuclease V gamma subunit [EC:3.1.11.5]	82867	502	44993	2426	10247	30875	3430	4165	10880	34363
K01145	exodeoxyribonuclease VII [EC:3.1.11.6]	9	21	10	50	37	7	14	7	10	13
K03601	exodeoxyribonuclease VII large subunit [EC:3.1.11.6]	84684	140658	82490	115169	91220	76831	68900	25525	52010	37688
K03602	exodeoxyribonuclease VII small subunit [EC:3.1.11.6]	84672	140646	82424	115059	90546	76809	68711	25525	51661	37663
K10906	exodeoxyribonuclease VIII [EC:3.1.11.-]	2	4	562	35	1721	175	1	5	3	5
K10857	exodeoxyribonuclease X [EC:3.1.11.-]	83	185	268	239	2077	193	3958	4116	3246	117
K03546	exonuclease SbcC	83526	1451	60234	11562	12978	67425	64602	18132	24115	34956
K03547	exonuclease SbcD	83322	1449	59402	11565	11469	67228	62422	16074	22396	34938
K01514	exopolyphosphatase [EC:3.6.1.11]	153	7649	31112	9693	3921	22982	4198	3877	4892	17985
K01147	exoribonuclease II [EC:3.1.13.1]	137	79450	12401	15498	44387	2246	3384	3062	9651	34612
K11945	extradiol dioxygenase [EC:1.13.11.-]	4	128	21	12	11	185	5	2	26	1
K14127	F420-non-reducing hydrogenase iron-sulfur subunit D [EC:1.12.99.-]	6	0	1	0	64	0	556	333	833	34
K14126	F420-non-reducing hydrogenase subunit A [EC:1.12.99.-]	0	0	1	0	71	0	156	235	1303	10
K14128	F420-non-reducing hydrogenase subunit G [EC:1.12.99.-]	0	0	1	0	56	0	80	146	725	6
K14266	FADH2 O2-dependent halogenase I [EC:1.14.14.7]	41	52092	22361	7664	11630	23528	913	4273	13695	474
K14257	FADH2 O2-dependent halogenase II [EC:1.14.14.-]	10	9	31293	64	395	24338	59	1197	815	175
K00801	farnesyl-diphosphate farnesyltransferase [EC:2.5.1.21]	4	2	5	67	703	17	67	182	139	8
K12423	fatty acid CoA ligase FadD21	2	2	4	138	18	2	4	7	26	1
K12427	fatty acid CoA ligase FadD28	0	0	1	0	2	0	0	2	2	0
K12428	fatty acid CoA ligase FadD32	4	9	141	154	115	1794	12	14	29	2
K12429	fatty acid CoA ligase FadD36	3	23	92	145	29	720	9	13	29	3
K12421	fatty acid CoA ligase FadD9	3	5	9	278	38	10	52	25	32	4
K11533	fatty acid synthase, bacteria type [EC:2.3.1.-]	5	7	6	197	84	25	8	15	28	2
K14331	fatty aldehyde decarbonylase	2	0	6	16	945	14	87	21	11	6
K14330	fatty aldehyde-generating acyl-ACP reductase	2	0	6	16	945	14	87	21	11	6
K00666	fatty-acyl-CoA synthase [EC:6.2.1.-]	332609	400577	181777	421596	232738	147237	30632	37798	51222	18570
K02379	FdhD protein	83313	125601	83610	112976	83705	75587	36328	20027	34735	37614
K02380	FdhE protein	167	8894	14185	15126	12464	10437	683	2384	1701	1114
K02381	FdrA protein	11	83	780	16	46	716	2	6	3	3
K07400	Fe/S biogenesis protein NfuA	82792	325	41591	775	9140	30248	3267	5615	21467	34621
K10826	Fe3+-transporting ATPase [EC:3.6.3.30]	12	15	22	18	393	87	185	154	352	278
K05337	ferredoxin	344	899	4992	4570	3266	6464	8786	8960	7670	717
K02639	ferredoxin	8	3	29	76	4643	69	540	313	139	89
K05524	ferredoxin	82917	192925	65329	270236	126968	65852	12681	15573	33557	35545
K11107	ferredoxin	21	18	577	80	2818	189	3053	2254	8487	33857
K00532	ferredoxin hydrogenase [EC:1.12.7.2]	7	20	1	41	1072	1	522	169	99	33
K06441	ferredoxin hydrogenase gamma subunit [EC:1.12.7.2]	117	0	0	665	0	0	4	16	20	2
K00533	ferredoxin hydrogenase large subunit [EC:1.12.7.2]	0	9	1	0	154	1	11	520	316	489
K00534	ferredoxin hydrogenase small subunit [EC:1.12.7.2]	10	13	61	2311	1583	24	239	1007	1144	492
K03855	ferredoxin like protein	109	8328	406	13275	2989	97	550	325	156	39
K05710	ferredoxin subunit of phenylpropionate dioxygenase	180	80169	24351	181354	79072	11493	3419	4546	2808	1749
K04755	ferredoxin, 2Fe-2S	82937	198118	63291	288557	154265	67814	14156	18874	43563	37075
K00529	ferredoxin--NAD+ reductase [EC:1.18.1.3]	82898	247443	28981	351573	131818	18481	11871	13476	17948	2741
K00528	ferredoxin--NADP+ reductase [EC:1.18.1.2]	167546	178227	112101	205902	119594	93381	16049	17333	35570	25715
K02641	ferredoxin--NADP+ reductase [EC:1.18.1.2]	2	0	6	16	952	14	90	25	14	6
K00367	ferredoxin-nitrate reductase [EC:1.7.7.2]	2	0	6	16	945	14	130	80	22	8
K00366	ferredoxin-nitrite reductase [EC:1.7.7.1]	164	823	5422	2742	2036	29078	71711	10232	8620	418
K02572	ferredoxin-type protein NapF	63	6314	491	384	664	144	42347	10734	17646	19868
K02573	ferredoxin-type protein NapG	71	24	2949	29	450	149	41017	10772	16697	20251
K02574	ferredoxin-type protein NapH	70	25	2948	40	440	149	41874	9447	12807	20163
K13255	ferric iron reductase protein FhuF	17	6976	10373	2076	2788	6469	516	162	1002	12595
K02217	ferritin [EC:1.16.3.1]	1515	9337	8814	3533	12316	1104	26307	11111	20684	35721
K02255	ferritin-like protein 2	2	3	138	35	1856	56	1	4	2	4
K01772	ferrochelatase [EC:4.99.1.1]	83813	138647	78179	123689	93379	74644	121328	34868	64722	39153
K04758	ferrous iron transport protein A	2364	84179	22523	14100	63591	15715	119714	26808	28238	23373
K04759	ferrous iron transport protein B	2541	92230	26715	17446	63414	17532	100609	24860	37476	38591
K07490	ferrous iron transport protein C	2	3	562	36	1866	175	1	5	2	5
K13283	ferrous-iron efflux pump FieF	14	160	291	3999	2871	193	5335	3312	8933	33798
K09252	feruloyl esterase [EC:3.1.1.73]	82762	1638	4059	3829	19209	4475	424	483	280	85
K12508	feruloyl-CoA synthase [EC:6.2.1.34]	17	4785	14248	9623	17927	9616	5002	3939	4093	246
K09013	Fe-S cluster assembly ATP-binding protein	84150	61306	30151	109389	49927	46297	49138	22264	34576	4849
K05997	Fe-S cluster assembly protein SufA	2	4	562	38	1933	176	71	213	568	9
K09014	Fe-S cluster assembly protein SufB	83737	61178	30264	108797	49465	46393	48525	21768	36654	4293
K09015	Fe-S cluster assembly protein SufD	83552	61155	29960	109188	49118	45964	48404	21566	36625	4289
K07169	FHA domain-containing protein	3	140	648	451	17730	53	7	6	3	16
K14200	fibrinogen-binding protein	0	0	0	0	19	62	0	1	2	1
K13734	fibronectin-binding protein 1	1	1	2	4	21	1027	3	1	1	3
K13732	fibronectin-binding protein A	0	0	0	0	19	62	0	1	2	1
K13733	fibronectin-binding protein B	0	0	0	0	19	62	0	1	2	1
K07346	fimbrial chaperone protein	380	80857	49049	8180	32321	29033	153	1418	3037	253
K07353	fimbrial chaperone protein	0	0	0	0	2	0	0	0	0	0
K07356	fimbrial protein	2	0	1	0	1294	2	0	2	2	2
K07351	fimbrial protein	2	6	699	70	2279	228	1	7	2	8
K08087	fimbrial protein FimW	0	0	0	1	14	0	0	0	0	0
K08088	fimbrial protein FimY	2	0	1	1	1306	2	0	2	2	2
K07355	fimbrial-like protein	0	0	0	0	2	0	0	0	0	0
K03557	Fis family transcriptional regulator, factor for inversion stimulation protein	82843	79752	53392	15173	51058	32274	5068	7106	24355	47649
K03773	FKBP-type peptidyl-prolyl cis-trans isomerase FklB [EC:5.2.1.8]	166873	17359	88039	3741	30840	60379	4818	8578	32685	36023
K03772	FKBP-type peptidyl-prolyl cis-trans isomerase FkpA [EC:5.2.1.8]	306	79489	13921	5626	66604	3515	3300	4420	21510	34316
K03774	FKBP-type peptidyl-prolyl cis-trans isomerase SlpA [EC:5.2.1.8]	82836	79491	53232	14505	31280	32031	3546	6445	22763	34673
K03775	FKBP-type peptidyl-prolyl cis-trans isomerase SlyD [EC:5.2.1.8]	166404	88030	61880	13286	73753	33904	74300	19032	50946	36939
K02386	flagella basal body P-ring formation protein FlgA	83065	129934	56657	109831	79600	33482	10605	12167	28940	48411
K02399	flagella synthesis protein FlgN	82823	79327	52669	13341	27849	31641	4011	4334	14523	47185
K13626	flagellar assembly factor FliW	516	808	2165	3278	3681	230	37470	7925	6403	881
K02411	flagellar assembly protein FliH	83351	85224	56854	25143	58905	33656	43626	14532	28699	35967
K02389	flagellar basal-body rod modification protein FlgD	83388	131061	61128	116079	83895	36449	81842	22799	36992	50961
K02387	flagellar basal-body rod protein FlgB	83607	131138	58505	113830	83688	36421	48040	19854	34310	50716
K02388	flagellar basal-body rod protein FlgC	83672	131861	61679	115838	84200	38719	48361	20970	35674	51207
K02391	flagellar basal-body rod protein FlgF	82988	130209	56464	111675	80499	36034	10655	11982	28274	49842
K02392	flagellar basal-body rod protein FlgG	83922	131702	63050	115525	86261	39135	101506	26795	39024	51675
K04061	flagellar biosynthesis protein	83269	80358	52889	16260	30762	31116	55614	8586	7939	1068
K02400	flagellar biosynthesis protein FlhA	83638	131102	61822	114114	86532	38831	68796	22735	35599	50895
K02404	flagellar biosynthesis protein FlhF	83419	80423	53891	17603	53149	32178	40156	12117	16547	35202
K04562	flagellar biosynthesis protein FlhG	83255	1067	45001	3815	43561	31235	38472	10663	15955	35385
K02401	flagellar biosynthetic protein FlhB	83289	130929	61068	113943	85626	36368	47989	19868	34249	50714
K02419	flagellar biosynthetic protein FliP	83604	131083	61493	114105	85303	38693	48098	20036	34406	50731
K02420	flagellar biosynthetic protein FliQ	83602	131187	61570	114212	85955	38745	48073	19946	34296	50729
K02421	flagellar biosynthetic protein FliR	83293	130936	61360	113999	85740	38691	48025	20006	34374	50722
K13820	flagellar biosynthetic protein FliR/FlhB	0	27	0	40	1	0	66	28	28	6
K02413	flagellar FliJ protein	83278	84011	54393	16445	53524	32701	4192	5696	11563	34965
K02415	flagellar FliL protein	166092	130954	92422	113075	85076	62358	70435	27304	59864	83665
K02390	flagellar hook protein FlgE	83649	131555	62308	116653	84337	38756	115742	26481	40590	51595
K02396	flagellar hook-associated protein 1 FlgK	83640	130404	58450	116185	84141	36590	81395	22362	36014	50887
K02407	flagellar hook-associated protein 2	83496	80715	58157	20299	55434	36566	75424	16524	35682	50710
K02397	flagellar hook-associated protein 3 FlgL	83296	130887	57900	109248	82624	34194	81491	21234	36426	50821
K02408	flagellar hook-basal body complex protein FliE	83602	131217	62338	114138	84346	39729	48116	20073	34436	50735
K02414	flagellar hook-length control protein FliK	83019	79378	53356	5414	44739	31997	4661	5112	14497	47563
K02393	flagellar L-ring protein precursor FlgH	83118	130225	60369	112172	80839	38308	44959	17170	32855	50577
K02410	flagellar motor switch protein FliG	83636	131227	58804	114183	86441	36590	69084	23039	35768	51023
K02416	flagellar motor switch protein FliM	83587	130995	57838	113566	83273	34001	46078	17800	25200	36013
K02417	flagellar motor switch protein FliN/FliY	83687	135841	61480	120611	85457	36269	102890	25078	38367	51168
K02409	flagellar M-ring protein FliF	83416	131648	61743	114065	86303	38722	68299	21995	33962	50809
K02394	flagellar P-ring protein precursor FlgI	83112	130217	60259	112109	80766	38178	44151	16771	31506	36024
K06602	flagellar protein FlaF	29	50194	414	93498	28488	41	6176	6905	12981	668
K06603	flagellar protein FlaG	83237	83663	53551	16590	30058	31452	25089	8602	13166	35106
K02383	flagellar protein FlbB	7	0	0	0	2	0	18	154	35	19
K02385	flagellar protein FlbD	175	988	999	2939	3350	528	3213	2801	1619	147
K06601	flagellar protein FlbT	30	50523	413	94171	28473	41	6055	7009	12957	642
K02395	flagellar protein FlgJ	83077	80734	55204	15859	53577	35411	4758	5273	15316	47289
K03516	flagellar protein FlhE	12	10	8	9	1488	26	34	109	273	263
K02418	flagellar protein FliO/FliZ	83295	84421	55542	20424	56344	33524	4389	6035	12077	34917
K02422	flagellar protein FliS	166338	80872	58788	21293	57597	34251	62545	14628	22274	50237
K02423	flagellar protein FliT	53	79420	12254	13581	43053	2231	97	214	407	318
K06604	flagellar rod protein FlaI	10	11	8	10	40	11	3032	2140	7381	33780
K02402	flagellar transcriptional activator FlhC	54	79420	12196	14332	43420	2144	75	196	398	317
K02403	flagellar transcriptional activator FlhD	56	79424	12199	15748	43522	2147	1108	908	2602	12241
K02406	flagellin	167085	238481	68450	280635	157504	41599	153365	48874	99924	195617
K02412	flagellum-specific ATP synthase [EC:3.6.3.14]	83600	131204	61522	113808	85848	38709	47748	19732	33952	48775
K14631	flavin reductase ActVB [EC:1.5.1.29]	0	4	11	10	23	100	2	2	1	0
K03839	flavodoxin I	1278	25958	5361	3772	7003	292	72542	9519	23330	36949
K03840	flavodoxin II	13	15	571	49	2070	186	3050	2250	7856	33854
K02425	FliZ protein	2	1	425	2	1403	122	1	3	3	4
K07192	flotillin	199	37046	15441	81170	27197	4156	2879	2120	2573	162
K00299	FMN reductase [EC:1.5.1.29]	130	121987	102799	90798	64741	92010	2957	5137	3391	605
K01118	FMN-dependent NADH-azoreductase [EC:1.7.-.-]	83069	167475	151550	28412	57669	103953	9041	12950	28796	23520
K11779	FO synthase [EC:2.5.1.-]	21	211	11318	601	1170	2201	3978	4562	7518	133
K11780	FO synthase subunit 1 [EC:2.5.1.-];FO synthase subunit 1 [EC:2.5.1.77]	2	0	4	10	680	12	55	21	8	5
K11781	FO synthase subunit 2 [EC:2.5.1.-];FO synthase subunit 2 [EC:2.5.1.77]	2	0	4	10	683	12	56	21	8	5
K07533	foldase protein PrsA [EC:5.2.1.8]	448	676	3552	157	2999	10311	20953	3366	1370	242
K01930	folylpolyglutamate synthase [EC:6.3.2.17]	0	0	0	0	3	5	0	0	0	0
K06318	forespore regulator of the sigma-K checkpoint	3	422	36	3	51	101	8	9	2	1
K10713	formaldehyde-activating enzyme [EC:4.3.-.-]	5	954	2000	3157	33000	1360	102	238	174	59
K01455	formamidase [EC:3.5.1.49]	128	2571	24181	6865	34746	35006	887	794	527	215
K10563	formamidopyrimidine-DNA glycosylase [EC:3.2.2.23 4.2.99.18]	166917	269831	173801	247227	179087	182925	36030	38911	80902	72422
K00538	formate acetyltransferase activating enzyme [EC:1.97.1.4]	0	0	0	0	1	0	40	17	14	5
K00656	formate C-acetyltransferase [EC:2.3.1.54]	1985	9656	6468	6602	19751	12572	48790	12759	19796	71684
K04509	formate dehydrogenase (cytochrome) [EC:1.2.2.1]	0	0	0	31	33	62	0	6	4	1
K05299	formate dehydrogenase (NADP+) [EC:1.2.1.43];formate dehydrogenase alpha subunit [EC:1.2.1.43]	1	0	1	1	55	1	369	365	630	1510
K00122	formate dehydrogenase [EC:1.2.1.2]	102	37885	39441	79012	24602	29055	278	469	714	82
K15022	formate dehydrogenase beta subunit [EC:1.2.1.43]	124	1	849	666	17	2	1956	2087	1613	16
K00123	formate dehydrogenase, alpha subunit [EC:1.2.1.2]	166874	227285	169022	152552	146335	131923	81112	40882	61463	63051
K00124	formate dehydrogenase, beta subunit [EC:1.2.1.2]	83271	130580	49065	114921	76027	53038	44340	16849	26821	36797
K00125	formate dehydrogenase, beta subunit [EC:1.2.1.2]	1	0	0	0	0	0	21	20	13	8
K00126	formate dehydrogenase, delta subunit [EC:1.2.1.2]	79	120643	31707	99254	52524	19565	2664	2031	1916	154
K00127	formate dehydrogenase, gamma subunit [EC:1.2.1.2]	83050	131337	49512	110365	74211	31387	44517	14360	28538	35547
K08348	formate dehydrogenase-N, alpha subunit [EC:1.2.1.2]	2	3	562	36	1846	175	1	5	2	5
K08349	formate dehydrogenase-N, beta subunit [EC:1.2.1.2]	2	3	138	35	1871	56	1	4	2	4
K08350	formate dehydrogenase-N, gamma subunit [EC:1.2.1.2]	2	3	562	38	1894	175	1	5	4	5
K06212	formate transporter	17	18	576	368	2103	192	5423	5176	15753	45809
K03459	formate transporter	0	0	0	0	2	0	0	0	0	0
K04017	formate-dependent nitrite reductase complex subunit NrfF	0	0	0	1	24	0	4	0	4	20
K04018	formate-dependent nitrite reductase complex subunit NrfG	8	8	6	9	147	7	1647	1147	4668	20311
K04014	formate-dependent nitrite reductase, Fe-S protein;protein NrfC	193	10	477	13	356	127	3278	5205	11968	19236
K04013	formate-dependent nitrite reductase, penta-haeme cytochrome c;cytochrome c-type protein NrfB	14	9	432	12	193	127	3463	3583	10667	20383
K04016	formate-dependent nitrite reductase, possible assembly protein;cytochrome c-type protein NrfE	0	0	425	3	137	120	1	1	2	2
K01938	formate--tetrahydrofolate ligase [EC:6.3.4.3]	1251	81413	8694	168721	73036	11716	33461	15108	25091	35016
K05603	formimidoylglutamate deiminase [EC:3.5.3.13]	25	6747	40181	2954	19616	29155	385	2232	11706	477
K01479	formiminoglutamase [EC:3.5.3.8]	135	124607	54074	90215	37197	61845	8062	11452	25073	36629
K01746	formiminotetrahydrofolate cyclodeaminase [EC:4.3.1.4]	57	117	248	8	1657	191	20742	2976	1221	166
K07749	formyl-CoA transferase [EC:2.8.3.16]	83113	281661	109495	133499	116261	43957	10789	13691	18539	1962
K00200	formylmethanofuran dehydrogenase subunit A [EC:1.2.99.5]	3	691	147	2813	17802	17	96	236	173	45
K00201	formylmethanofuran dehydrogenase subunit B [EC:1.2.99.5]	3	691	147	2807	17800	17	66	136	57	41
K00202	formylmethanofuran dehydrogenase subunit C [EC:1.2.99.5]	3	691	147	2807	17800	17	67	138	57	41
K11261	formylmethanofuran dehydrogenase subunit E [EC:1.2.99.5]	568	11	31	1181	1244	2	996	2765	2263	978
K00672	formylmethanofuran--tetrahydromethanopterin N-formyltransferase [EC:2.3.1.101]	3	682	146	2784	17676	17	9	6	11	17
K01433	formyltetrahydrofolate deformylase [EC:3.5.1.10]	166350	152926	119359	115942	90197	99609	47071	22064	42384	38994
K14203	FPRL1 inhibitory protein	0	0	0	0	19	62	0	1	2	1
K03332	fructan beta-fructosidase [EC:3.2.1.80]	2	1	1	1	9	7527	0	1	4	0
K00847	fructokinase [EC:2.7.1.4]	84595	75322	72654	119555	77700	78612	19269	23250	60515	57519
K01622	fructose 1,6-bisphosphate aldolase/phosphatase [EC:4.1.2.13 3.1.3.11]	106	214	268	2834	1088	236	502	237	157	26
K10554	fructose transport system ATP-binding protein	28	43065	1122	85943	43743	794	1465	1737	3772	529
K10553	fructose transport system permease protein	26	42857	1067	85859	43562	432	1387	1696	3693	517
K10552	fructose transport system substrate-binding protein	26	42857	1067	85859	43562	432	1378	1689	3669	517
K03841	fructose-1,6-bisphosphatase I [EC:3.1.3.11]	83336	98520	58753	32269	61515	32878	45386	17442	33213	37817
K11532	fructose-1,6-bisphosphatase II / sedoheptulose-1,7-bisphosphatase [EC:3.1.3.11 3.1.3.37]	3	1	12	31	1890	28	180	49	24	12
K02446	fructose-1,6-bisphosphatase II [EC:3.1.3.11]	656	45581	17746	104267	37220	33807	33416	15547	24293	35384
K04041	fructose-1,6-bisphosphatase III [EC:3.1.3.11]	146	214	3388	62	762	1578	154	332	102	75
K08313	fructose-6-phosphate aldolase 1 [EC:4.1.2.-]	6	8	143	44	1835	60	508	152	973	12567
K08314	fructose-6-phosphate aldolase 2 [EC:4.1.2.-]	2	5	138	76	565	54	475	326	510	1525
K01632	fructose-6-phosphate phosphoketolase [EC:4.1.2.22]	38	24	8	2143	176	13	6	11	32	2
K01623	fructose-bisphosphate aldolase, class I [EC:4.1.2.13]	752	91080	9340	182025	88398	6455	11669	15397	21446	1908
K01624	fructose-bisphosphate aldolase, class II [EC:4.1.2.13]	85347	112819	94122	46683	71351	84036	75572	28879	58871	53725
K10710	fructoselysine 6-kinase [EC:2.7.1.-]	2	6052	69	354	1256	73	78	204	300	11
K10708	fructoselysine 6-phosphate deglycase [EC:3.5.-.-]	0	0	0	0	18	0	0	0	0	0
K00040	fructuronate reductase [EC:1.1.1.57]	413	14805	16118	9974	17277	7833	4039	3861	3749	18468
K02137	F-type H+-transporting ATPase oligomycin sensitivity conferral protein [EC:3.6.3.14]	0	0	0	8	33	0	28	188	5	3
K02108	F-type H+-transporting ATPase subunit a [EC:3.6.3.14]	84828	172703	83660	196455	119100	80549	76093	32001	61070	41134
K02111	F-type H+-transporting ATPase subunit alpha [EC:3.6.3.14]	84821	140881	83486	118967	95661	79519	76565	32287	62049	55432
K02109	F-type H+-transporting ATPase subunit b [EC:3.6.3.14]	85108	191589	85907	215768	126365	83009	119104	45880	81787	56955
K02112	F-type H+-transporting ATPase subunit beta [EC:3.6.3.14]	84814	140812	82757	118998	96577	79193	76751	32843	62792	53716
K02110	F-type H+-transporting ATPase subunit c [EC:3.6.3.14]	84766	140893	83469	118954	95057	79528	76541	32317	62027	53707
K02113	F-type H+-transporting ATPase subunit delta [EC:3.6.3.14]	84578	140871	83009	118582	94597	76880	75670	30771	58297	53859
K02114	F-type H+-transporting ATPase subunit epsilon [EC:3.6.3.14]	84814	140872	82156	119037	95675	77035	76699	32349	62764	53712
K02115	F-type H+-transporting ATPase subunit gamma [EC:3.6.3.14]	84821	140881	83486	118967	95813	79519	76565	32287	62049	55432
K13007	Fuc2NAc and GlcNAc transferase [EC:2.4.1.-]	134	27	34569	886	1113	25847	33836	4214	3806	344
K05305	fucokinase [EC:2.7.1.52]	0	1	0	0	0	0	0	1	0	0
K01677	fumarate hydratase subunit alpha [EC:4.2.1.2]	620	332	1272	1829	4973	243	2883	3628	2905	661
K01678	fumarate hydratase subunit beta [EC:4.2.1.2]	595	235	1271	1829	4952	243	2859	3381	2889	657
K01676	fumarate hydratase, class I [EC:4.2.1.2]	83552	94863	60271	26560	56149	36720	38701	10642	35129	36035
K01679	fumarate hydratase, class II [EC:4.2.1.2]	83396	136227	110702	121129	72953	91977	51038	27982	57073	33605
K00244	fumarate reductase flavoprotein subunit [EC:1.3.99.1]	656	2187	6531	5247	7096	3384	81994	16185	18091	35514
K00245	fumarate reductase iron-sulfur protein [EC:1.3.99.1];fumarate reductase iron-sulfur subunit [EC:1.3.99.1]	162	57	2414	3127	2841	249	74555	12697	17138	35067
K00246	fumarate reductase subunit C;fumarate reductase subunit C [EC:1.3.99.1]	154	42	760	3116	2716	231	38931	7768	12987	34897
K00247	fumarate reductase subunit D [EC:1.3.99.1];fumarate reductase subunit D	23	28	739	3046	2539	212	3130	2375	7897	34199
K01555	fumarylacetoacetase [EC:3.7.1.2]	88	83836	52224	18440	29952	34521	10325	13088	22007	2561
K03711	Fur family transcriptional regulator, ferric uptake regulator	85756	241178	115766	134757	144769	126675	152288	49015	86494	43953
K09826	Fur family transcriptional regulator, iron response regulator	29	46931	494	99903	30516	44	4771	4641	8101	698
K09825	Fur family transcriptional regulator, peroxide stress response regulator	1164	885	5654	3048	6444	10324	55281	7356	5467	552
K09823	Fur family transcriptional regulator, zinc uptake regulator	82855	52683	44261	111015	47235	33965	10627	13687	35786	48134
K02076	Fur family transcriptional regulator, zinc uptake regulator	122	602	3529	21	1401	1606	39	259	34	6
K03110	fused signal recognition particle receptor	84736	140866	83010	124154	97724	77105	75535	31351	60076	39508
K11783	futalosine hydrolase [EC:3.2.2.26]	1	2	88	5	6	719	1	1	1	1
K11735	GABA permease	0	0	0	1	133	0	0	0	0	1
K07170	GAF domain-containing protein	1058	15628	50619	22821	28769	43713	12688	17925	49622	38106
K01708	galactarate dehydratase [EC:4.2.1.42]	215	4685	27086	4434	21118	19192	270	1228	979	252
K00094	galactitol-1-phosphate 5-dehydrogenase [EC:1.1.1.251]	2	4	138	35	1832	56	1	4	1	4
K00849	galactokinase [EC:2.7.1.6]	1496	9403	29195	13810	16699	41703	10865	9830	21767	36726
K01684	galactonate dehydratase [EC:4.2.1.6]	52	15879	27181	10135	22129	19867	1637	2976	2097	5867
K02080	galactosamine-6-phosphate isomerase [EC:5.3.1.-]	0	0	0	2	43	0	583	1212	384	39
K00964	galactose-1-phosphate uridylyltransferase [EC:2.7.7.10]	0	0	0	0	3	4	0	0	0	0
K01819	galactose-6-phosphate isomerase [EC:5.3.1.26]	30	59	5708	20	563	4229	61	22	34	12
K00633	galactoside O-acetyltransferase [EC:2.3.1.18]	512	4691	627	104	1578	244	4012	2812	6220	20638
K13004	galacturonosyltransferase [EC:2.4.1.-]	195	0	2	5	1523	1	1	1	1	3
K00471	gamma-butyrobetaine dioxygenase [EC:1.14.11.1]	32	1176	38836	5503	2703	30896	2342	6887	21357	1383
K14940	gamma-F420-2:alpha-L-glutamate ligase [EC:6.3.2.32]	0	0	0	1	4	0	0	1	615	2
K09472	gamma-glutamyl-gamma-aminobutyraldehyde dehydrogenase [EC:1.2.1.-]	38	8077	20688	11051	5352	15921	6065	6375	14266	2703
K09473	gamma-glutamyl-gamma-aminobutyrate hydrolase [EC:3.5.1.94]	0	3	137	35	575	53	0	2	78	2
K09471	gamma-glutamylputrescine oxidase [EC:1.4.3.-]	82806	25315	81755	14297	14080	59834	7401	13043	32100	5003
K09470	gamma-glutamylputrescine synthase [EC:6.3.1.11]	5	10	143	73	589	59	522	314	806	1655
K00681	gamma-glutamyltranspeptidase [EC:2.3.2.2]	165965	309249	141935	186979	140942	109304	55489	36388	80976	66252
K13583	GcrA cell cycle regulator	35	51200	2042	98617	29763	927	6629	7394	13356	779
K01308	g-D-glutamyl-meso-diaminopimelate peptidase [EC:3.4.19.11]	54	10	98	17	979	188	85	301	61	59
K10046	GDP-D-mannose 3', 5'-epimerase [EC:5.1.3.18 5.1.3.-]	0	0	0	33	756	1	139	478	305	6
K02377	GDP-L-fucose synthase [EC:1.1.1.271]	667	20866	22631	14036	29992	30814	10502	12979	20332	8504
K01711	GDPmannose 4,6-dehydratase [EC:4.2.1.47]	730	27551	67693	36301	40133	60987	14180	18090	24468	20863
K00066	GDP-mannose 6-dehydrogenase [EC:1.1.1.132]	82756	182	41148	2831	1943	30336	99	43	116	41
K12945	GDP-mannose pyrophosphatase NudK [EC:3.6.1.-]	2	3	138	35	1886	56	1	5	2	4
K03285	general bacterial porin, GBP family	9	12	140	2784	2137	11	1525	849	3291	26249
K09972	general L-amino acid transport system ATP-binding protein [EC:3.6.3.-]	82901	81923	42958	187590	61699	31502	10718	13482	37479	50171
K09970	general L-amino acid transport system permease protein	82837	108967	43148	261099	100802	30753	9619	12400	33453	35410
K09971	general L-amino acid transport system permease protein	82837	109729	43149	266908	101325	30753	9447	12361	33440	35402
K09969	general L-amino acid transport system substrate-binding protein	82896	227143	55687	352580	132381	33243	9793	12651	34063	35754
K02450	general secretion pathway protein A	82821	48	2448	506	18751	1102	3238	4390	20319	34182
K02451	general secretion pathway protein B	10	26	283	54	743	73	2633	2229	7960	28285
K02452	general secretion pathway protein C	165566	80365	54146	13735	30327	32142	38996	11366	25803	34655
K02453	general secretion pathway protein D	83140	86231	79267	34920	87918	49854	42370	14831	30682	47542
K02454	general secretion pathway protein E	165750	86696	113941	27076	108954	75714	76024	21453	46005	48236
K02455	general secretion pathway protein F	82880	86237	78883	23718	70307	49802	75500	17353	32533	47580
K02456	general secretion pathway protein G	83410	165483	100316	35352	123307	58961	76771	19929	35226	48086
K02457	general secretion pathway protein H	82822	82112	65484	23010	37064	40667	3718	6617	22427	34620
K02458	general secretion pathway protein I	82826	85061	65515	23012	37250	40657	3771	6973	22829	34466
K02459	general secretion pathway protein J	82831	81839	65500	22701	37000	40662	3760	6688	22946	34618
K02460	general secretion pathway protein K	82835	82919	65519	23127	37157	40675	4350	7414	24088	47203
K02461	general secretion pathway protein L	82831	82099	65498	22576	36963	40668	3538	6371	22151	34602
K02462	general secretion pathway protein M	82822	81101	65478	18554	35925	40653	3576	6434	22301	34451
K02463	general secretion pathway protein N	65	80058	19697	15890	31786	7048	3327	4834	20064	34229
K02464	general secretion pathway protein O [EC:3.4.23.43 2.1.1.-]	0	9	836	115	1609	312	0	7	0	8
K02465	general secretion pathway protein S	0	6	274	68	956	106	0	4	0	4
K07570	general stress protein 13	96	88	3234	20	340	10241	69	26	81	19
K03395	gentamicin 3'-N-acetyltransferase [EC:2.3.1.60]	6	2	774	46	49	522	2	3	36	2
K00450	gentisate 1,2-dioxygenase [EC:1.13.11.4]	20	3149	13531	16121	25324	2350	2487	1883	1830	77
K13777	geranyl-CoA carboxylase alpha subunit [EC:6.4.1.5]	82754	62	41763	4491	1689	30617	166	344	639	43
K13778	geranyl-CoA carboxylase beta subunit [EC:6.4.1.5]	82754	74	41763	4491	1689	30617	165	343	637	43
K13787	geranylgeranyl diphosphate synthase, type I [EC:2.5.1.1 2.5.1.10 2.5.1.29]	164	2205	53028	6440	8188	100023	10582	8663	6489	364
K13789	geranylgeranyl diphosphate synthase, type II [EC:2.5.1.1 2.5.1.10 2.5.1.29]	335661	32385	173960	49425	47595	174871	82618	42198	64813	12283
K10960	geranylgeranyl reductase [EC:1.3.1.83]	11	499	144	3967	2665	25	2371	2434	2411	93
K00795	geranyltranstransferase [EC:2.5.1.10];farnesyl diphosphate synthase [EC:2.5.1.1 2.5.1.10]	359	269572	31429	232111	161783	11618	90841	34337	77292	71065
K10187	germacradienol/geosmin synthase [EC:4.2.3.22 4.2.3.75 4.1.99.16];germacradienol/germacrene-D synthase [EC:4.2.3.22]	1	3	128	8	11	1063	3	2	2	2
K06298	germination protein M	152	521	327	23	1002	105	94	400	62	61
K07212	GGDEF domain	4	4	3	4	14	5	1493	931	2948	17488
K08589	gingipain R [EC:3.4.22.37]	0	0	0	0	0	0	0	1	1	0
K11477	glc operon protein GlcG	82769	61	38960	974	2182	29694	589	1433	2069	13029
K02441	GlpG protein	82778	57	35216	209	3467	26283	3234	5588	21390	34601
K01210	glucan 1,3-beta-glucosidase [EC:3.2.1.58]	12	144	36469	2579	16389	26901	24	20	46	27
K01215	glucan 1,6-alpha-glucosidase [EC:3.2.1.70]	13	20	2473	9	144	9737	5	2	3	6
K01199	glucan endo-1,3-beta-D-glucosidase [EC:3.2.1.39]	5	296	29	213	511	129	1218	1476	1380	5745
K11941	glucans biosynthesis protein C [EC:2.1.-.-]	2	3271	161	726	2247	66	6	15	5	7
K01706	glucarate dehydratase [EC:4.2.1.40]	82998	80096	65682	10021	24568	42739	120	1365	895	299
K13918	glucarate dehydratase-related protein	2	3	138	35	1891	56	1	5	2	4
K02466	glucitol operon activator protein	21	36248	1068	83065	25699	390	93	141	112	44
K01178	glucoamylase [EC:3.2.1.3]	4	6150	146	10995	2180	20	195	1428	1149	194
K00845	glucokinase [EC:2.7.1.2]	85331	121796	92683	207179	128287	56326	17984	25593	30487	17305
K00090	gluconate 2-dehydrogenase [EC:1.1.1.215]	75	78742	74505	13871	33694	49539	489	1388	1023	271
K06151	gluconate 2-dehydrogenase alpha chain [EC:1.1.99.3]	17	4177	36318	3800	1578	26912	2349	2332	2222	187
K06152	gluconate 2-dehydrogenase gamma chain [EC:1.1.99.3]	17	4209	36322	3839	1596	26974	2350	2333	2230	189
K00046	gluconate 5-dehydrogenase [EC:1.1.1.69]	852	144637	33315	108349	76039	12786	4708	6589	8418	957
K03299	gluconate:H+ symporter, GntP family	111	81456	123156	3705	21225	102106	2969	4354	8739	34108
K00851	gluconokinase [EC:2.7.1.12]	82920	156971	75691	177524	81963	66140	6328	7080	15965	37828
K01053	gluconolactonase [EC:3.1.1.17]	46	24779	34328	27224	30992	18038	2463	5631	2807	845
K02564	glucosamine-6-phosphate deaminase [EC:3.5.99.6]	2274	22965	25066	4899	19921	13092	30481	14295	26243	35496
K01504	glucosamine-6-phosphate isomerase [EC:3.5.99.6]	23	37304	33068	81383	25078	25319	438	230	239	65
K00820	glucosamine--fructose-6-phosphate aminotransferase (isomerizing) [EC:2.6.1.16]	84872	161536	83690	153763	110119	80035	76956	36617	67222	40849
K00034	glucose 1-dehydrogenase [EC:1.1.1.47]	41	1895	39935	6218	3169	30573	748	3666	12767	571
K00115	glucose dehydrogenase (acceptor) [EC:1.1.99.10]	0	0	0	14	2	0	0	0	0	0
K03495	glucose inhibited division protein A;tRNA uridine 5-carboxymethylaminomethyl modification enzyme	84704	140102	65652	121562	95071	46292	73019	29450	58860	39429
K03501	glucose inhibited division protein B [EC:2.1.-.-];ribosomal RNA small subunit methyltransferase G [EC:2.1.1.170]	84735	140867	82944	123361	97380	77104	75486	31331	60085	39506
K05340	glucose uptake protein	25	391	4057	3604	1335	1860	49	173	144	8
K01085	glucose-1-phosphatase [EC:3.1.3.10]	2	3	563	38	1880	175	1	5	3	5
K00975	glucose-1-phosphate adenylyltransferase [EC:2.7.7.27]	1056	42740	22513	106484	60000	51229	36713	18154	35182	82540
K00978	glucose-1-phosphate cytidylyltransferase [EC:2.7.7.33]	289	17245	31765	12724	22197	24793	7811	8127	8350	798
K05344	glucose-1-phosphate phosphodismutase [EC:2.7.1.41]	0	0	0	0	7	4	0	0	0	0
K00973	glucose-1-phosphate thymidylyltransferase [EC:2.7.7.24]	85187	174518	98651	202165	123138	61221	15823	21273	46441	29476
K00036	glucose-6-phosphate 1-dehydrogenase [EC:1.1.1.49]	166502	141729	125075	117664	89538	124048	16183	20345	41873	37681
K01792	glucose-6-phosphate 1-epimerase [EC:5.1.3.15]	82791	456	49213	3539	36625	57071	3321	3831	10034	34365
K01810	glucose-6-phosphate isomerase [EC:5.3.1.9]	84928	142134	94338	121621	100866	78663	77490	31532	50606	39498
K06859	glucose-6-phosphate isomerase, archaeal [EC:5.3.1.9]	93	6177	11200	1706	4027	1099	87	153	83	28
K00118	glucose-fructose oxidoreductase [EC:1.1.99.28]	21	38283	4078	82160	25943	26763	207	1429	564	76
K13693	glucosyl-3-phosphoglycerate synthase [EC:2.4.1.-]	6	39	129	176	268	2715	2437	1953	1356	37
[truncated: 3,789 more rows]

## Sheet: Sheet2
1. Spermidine
t-Test: Two-Sample Assuming Unequal Variances
	Variable 1	Variable 2
Mean	410667	45290.2
Variance	5.01671e+10	3.92515e+08
Observations	6	4
Hypothesized Mean Difference	0
df	5
t Stat	3.97259
P(T<=t) one-tail	0.00530438
t Critical one-tail	2.01505
P(T<=t) two-tail	0.0106088
t Critical two-tail	2.57058
2. ABC transpoters
t-Test: Two-Sample Assuming Unequal Variances
	Variable 1	Variable 2
Mean	76263.7	933
Variance	2.11065e+09	428429
Observations	6	4
Hypothesized Mean Difference	0
df	5
t Stat	4.01581
P(T<=t) one-tail	0.00508141
t Critical one-tail	2.01505
P(T<=t) two-tail	0.0101628
t Critical two-tail	2.57058
3. TonB proteins
t-Test: Two-Sample Assuming Unequal Variances
	Variable 1	Variable 2
Mean	193316	102898
Variance	4.10569e+09	1925766353
Observations	6	4
Hypothesized Mean Difference	0
df	8
t Stat	2.64826
P(T<=t) one-tail	0.0146674
t Critical one-tail	1.85955
P(T<=t) two-tail	0.0293347
t Critical two-tail	2.306
